# Supplementary material for: ARID1A Is Essential for Endometrial Function during Early Pregnancy
Source: PubMed Central journal article supplement (PMC4574948; doi:10.1371/journal.pgen.1005537), 2015-09-17
Supplement: pgen.1005537.s001.pdf [file pgen.1005537.s001.pdf]

**Supplemental Table 1.** *Arid1a*<sup>d/d</sup> mice were sterile.

| <b>Genotype</b>              | <b>Number of Mice Tested</b> | <b>Number of Litters</b> | <b>Number of Pups</b> | <b>Average Pups / Litter</b> | <b>Average Number of Litters /Mouse</b> |
|------------------------------|------------------------------|--------------------------|-----------------------|------------------------------|-----------------------------------------|
| <i>Arid1a</i> <sup>ff</sup>  | 9                            | 52                       | 375                   | 7.21 ± 0.29                  | 5.78 ± 0.15                             |
| <i>Arid1a</i> <sup>d/d</sup> | 9                            | 0                        | 0                     | 0                            | 0                                       |
