# Supplementary material for: ARID1A Is Essential for Endometrial Function during Early Pregnancy
Source: PubMed Central journal article supplement (PMC4574948; doi:10.1371/journal.pgen.1005537), 2015-09-17
Supplement: pgen.1005537.s002.pdf [file pgen.1005537.s002.pdf]

**Supplemental Table 2.** *Arid1a*<sup>d/d</sup> has normal ovulation and fertilization.

| <b>Genotype</b>                    | <b>Total Eggs</b> | <b>Average Eggs/ Female</b> |
|------------------------------------|-------------------|-----------------------------|
| <i>Arid1a</i> <sup>ff</sup> (n=4)  | 78                | 19.50 ± 1.85                |
| <i>Arid1a</i> <sup>d/d</sup> (n=7) | 139               | 19.86 ± 0.99                |

| <b>Genotype</b>                    | <b>Fertilized Eggs/ Total Eggs</b> | <b>Fertilization Rate</b> |
|------------------------------------|------------------------------------|---------------------------|
| <i>Arid1a</i> <sup>ff</sup> (n=3)  | 33 / 62                            | 53.16 %                   |
| <i>Arid1a</i> <sup>d/d</sup> (n=3) | 24 / 59                            | 40.92 %                   |
