# Supplementary material for: ARID1A Is Essential for Endometrial Function during Early Pregnancy
Source: PubMed Central journal article supplement (PMC4574948; doi:10.1371/journal.pgen.1005537), 2015-09-17
Supplement: pgen.1005537.s003.pdf [file pgen.1005537.s003.pdf]

**Supplemental Table 3.** List of regulated genes by *Arid1a* ablation

| Probe Set ID | Accession_ID | Gene    | Description                                                                     | Fold   |
|--------------|--------------|---------|---------------------------------------------------------------------------------|--------|
| 1415938_at   | NM_009258    | Spink3  | serine peptidase inhibitor, Kazal type 3                                        | -89.74 |
| 1420282_s_at | NM_053260    | Prss29  | protease, serine, 29                                                            | -30.70 |
| 1449992_at   | NM_053260    | Prss29  | protease, serine, 29                                                            | -25.54 |
| 1450802_at   | NM_053259    | Prss28  | protease, serine, 28                                                            | -20.69 |
| 1455898_x_at | NM_011401    | Slc2a3  | solute carrier family 2 (facilitated glucose transporter), member 3             | -12.16 |
| 1437052_s_at | NM_011401    | Slc2a3  | solute carrier family 2 (facilitated glucose transporter), member 3             | -10.64 |
| 1454608_x_at | NM_013697    | Ttr     | transthyretin                                                                   | -8.34  |
| 1423285_at   | NM_001198835 | Coch    | coagulation factor C homolog (Limulus polyphemus)                               | -7.68  |
| 1420338_at   | NM_009660    | Alox15  | arachidonate 15-lipoxygenase                                                    | -7.56  |
| 1452320_at   | NM_001081088 | Lrp2    | low density lipoprotein receptor-related protein 2                              | -7.50  |
| 1426526_s_at | NM_007696    | Ovgp1   | oviductal glycoprotein 1                                                        | -7.27  |
| 1427133_s_at | NM_001081088 | Lrp2    | low density lipoprotein receptor-related protein 2                              | -7.20  |
| 1421404_at   | NM_011339    | Cxcl15  | chemokine (C-X-C motif) ligand 15                                               | -6.00  |
| 1420678_a_at | NM_019583    | Il17rb  | interleukin 17 receptor B                                                       | -5.91  |
| 1417094_at   | NM_001146057 | Acot7   | acyl-CoA thioesterase 7                                                         | -5.89  |
| 1439543_at   | XM_622231    |         | RIKEN cDNA 1110064A23 gene                                                      | -5.70  |
| 1427514_at   | XM_888832    |         | hypothetical protein LOC624295                                                  | -5.56  |
| 1438377_x_at | NM_054055    | Slc13a3 | solute carrier family 13 (sodium-dependent dicarboxylate transporter), member 3 | -5.04  |
| 1451502_at   | NM_011987    | Pla2g10 | phospholipase A2, group X                                                       | -5.04  |
| 1426039_a_at | NM_145684    | Alox12e | arachidonate lipoxygenase, epidermal                                            | -4.98  |
| 1456335_at   | NM_001033288 | Gm106   | predicted gene 106                                                              | -4.94  |
| 1418697_at   | NM_009349    | Inmt    | indolethylamine N-methyltransferase                                             | -4.94  |
| 1457429_s_at | NM_001033288 | Gm106   | predicted gene 106                                                              | -4.72  |
| 1416953_at   | NM_010217    | Ctgf    | connective tissue growth factor                                                 | -4.68  |
| 1433529_at   | NM_173749    | Pamr1   | peptidase domain containing associated with muscle regeneration 1               | -4.64  |
| 1448891_at   | NM_030707    | Fcrls   | Fc receptor-like S, scavenger receptor                                          | -4.59  |
| 1419606_a_at | NM_011618    | Tnnt1   | troponin T1, skeletal, slow                                                     | -4.49  |
| 1427963_s_at | NM_153133    | Rdh9    | retinol dehydrogenase 9                                                         | -4.30  |
| 1416612_at   | NM_009994    | Cyp1b1  | cytochrome P450, family 1, subfamily b, polypeptide 1                           | -4.29  |
| 1456428_at   | NM_011339    | Cxcl15  | chemokine (C-X-C motif) ligand 15                                               | -4.22  |
| 1448964_at   | NM_009789    | S100g   | S100 calcium binding protein G                                                  | -4.18  |
| 1420940_x_at | NM_009063    | Rgs5    | regulator of G-protein signaling 5                                              | -4.09  |
| 1418259_a_at | NM_009849    | Entpd2  | ectonucleoside triphosphate diphosphohydrolase 2                                | -4.06  |
| 1421134_at   | NM_009704    | Areg    | amphiregulin                                                                    | -3.97  |
| 1423100_at   | NM_010234    | Fos     | FBJ osteosarcoma oncogene                                                       | -3.91  |
| 1420942_s_at | NM_009063    | Rgs5    | regulator of G-protein signaling 5                                              | -3.89  |
| 1437361_at   | NM_001105561 |         | predicted gene 11545                                                            | -3.87  |
| 1427492_at   | NM_181579    | Pof1b   | premature ovarian failure 1B                                                    | -3.83  |
| 1416560_at   | NM_054055    | Slc13a3 | solute carrier family 13 (sodium-dependent dicarboxylate transporter), member 3 | -3.83  |
| 1456084_x_at | NM_021355    | Fmod    | fibromodulin                                                                    | -3.78  |
| 1436124_at   | NM_177546    | Pcyt1b  | phosphate cytidyltransferase 1, choline, beta isoform                           | -3.71  |
| 1459737_s_at | NM_013697    | Ttr     | transthyretin                                                                   | -3.63  |
| 1455561_at   | NM_177450    | Cndp1   | carnosine dipeptidase 1 (metallopeptidase M20 family)                           | -3.58  |
| 1416505_at   | NM_010444    | Nr4a1   | nuclear receptor subfamily 4, group A, member 1                                 | -3.57  |
| 1453801_at   | NM_025416    | Them5   | thioesterase superfamily member 5                                               | -3.56  |
| 1417290_at   | NM_029796    | Lrg1    | leucine-rich alpha-2-glycoprotein 1                                             | -3.53  |
| 1417065_at   | NM_007913    | Egr1    | early growth response 1                                                         | -3.49  |
| 1418753_at   | NM_013529    | Gfpt2   | glutamine fructose-6-phosphate transaminase 2                                   | -3.48  |
| 1423858_a_at | NM_008256    | Hmgcs2  | 3-hydroxy-3-methylglutaryl-Coenzyme A synthase 2                                | -3.46  |
| 1425417_x_at | NM_001101620 | Klra8   | killer cell lectin-like receptor, subfamily A, member 8                         | -3.44  |

| Probe Set ID | Accession_ID | Gene     | Description                                                                                                        | Fold  |
|--------------|--------------|----------|--------------------------------------------------------------------------------------------------------------------|-------|
| 1417466_at   | NM_009063    | Rgs5     | regulator of G-protein signaling 5                                                                                 | -3.44 |
| 1428074_at   | NM_001002267 | Tmem158  | transmembrane protein 158                                                                                          | -3.42 |
| 1435465_at   | NM_029116    | Kbtbd11  | kelch repeat and BTB (POZ) domain containing 11                                                                    | -3.39 |
| 1425436_x_at | NM_010648    |          | killer cell lectin-like receptor, subfamily A, member 3 /// killer cell lectin-like receptor subfamily A, member 9 | -3.34 |
| 1452652_at   | NM_001002267 | Tmem158  | transmembrane protein 158                                                                                          | -3.34 |
| 1416321_s_at | NM_054077    | Prelp    | proline arginine-rich end leucine-rich repeat                                                                      | -3.32 |
| 1438796_at   | NM_015743    | Nr4a3    | nuclear receptor subfamily 4, group A, member 3                                                                    | -3.31 |
| 1453003_at   | NM_011436    | Sorl1    | sortilin-related receptor, LDLR class A repeats-containing                                                         | -3.28 |
| 1415939_at   | NM_021355    | Fmod     | fibromodulin                                                                                                       | -3.28 |
| 1448729_a_at | NM_011129    |          | septin 4                                                                                                           | -3.25 |
| 1460012_at   | NM_027961    | Wfdc3    | WAP four-disulfide core domain 3                                                                                   | -3.24 |
| 1449279_at   | NM_030677    | Gpx2     | glutathione peroxidase 2                                                                                           | -3.23 |
| 1418723_at   | NM_022983    | Lpar3    | lysophosphatidic acid receptor 3                                                                                   | -3.22 |
| 1420941_at   | NM_009063    | Rgs5     | regulator of G-protein signaling 5                                                                                 | -3.18 |
| 1429235_at   | NM_030166    | Galnt12  | UDP-N-acetyl-alpha-D-galactosamine:polypeptide N-acetylgalactosaminyltransferase-like 2                            | -3.12 |
| 1424683_at   | NM_001034851 | Fam134b  | family with sequence similarity 134, member B                                                                      | -3.07 |
| 1448194_a_at | NR_001592    | H19      | H19 fetal liver mRNA                                                                                               | -3.06 |
| 1431833_a_at | NM_008256    | Hmgcs2   | 3-hydroxy-3-methylglutaryl-Coenzyme A synthase 2                                                                   | -3.04 |
| 1448949_at   | NM_007607    | Car4     | carbonic anhydrase 4                                                                                               | -3.03 |
| 1458268_s_at | NM_008343    | Igfbp3   | insulin-like growth factor binding protein 3                                                                       | -3.03 |
| 1426112_a_at | NM_001110320 | Cd72     | CD72 antigen                                                                                                       | -2.98 |
| 1436332_at   | NM_001012401 | Hspb6    | heat shock protein, alpha-crystallin-related, B6                                                                   | -2.97 |
| 1426258_at   | NM_011436    | Sorl1    | sortilin-related receptor, LDLR class A repeats-containing                                                         | -2.97 |
| 1450505_a_at | NM_001034851 | Fam134b  | family with sequence similarity 134, member B                                                                      | -2.96 |
| 1418213_at   | NM_033373    | Krt23    | keratin 23                                                                                                         | -2.93 |
| 1451478_at   | NM_001039554 | Angptl7  | angiopoietin-like 7                                                                                                | -2.92 |
| 1450976_at   | NM_008681    | Ndrp1    | N-myc downstream regulated gene 1                                                                                  | -2.91 |
| 1433434_at   | NM_178737    | AW551984 | expressed sequence AW551984                                                                                        | -2.91 |
| 1422975_at   | NM_008604    | Mme      | membrane metallo endopeptidase                                                                                     | -2.90 |
| 1448021_at   | NM_001142952 | Fam46c   | family with sequence similarity 46, member C                                                                       | -2.90 |
| 1429236_at   | NM_030166    | Galnt12  | UDP-N-acetyl-alpha-D-galactosamine:polypeptide N-acetylgalactosaminyltransferase-like 2                            | -2.88 |
| 1455610_at   | NM_183312    | Synm     | synemin, intermediate filament protein                                                                             | -2.88 |
| 1428909_at   | NR_002860    |          | RIKEN cDNA A130040M12 gene                                                                                         | -2.85 |
| 1433933_s_at | NM_175316    | Slco2b1  | solute carrier organic anion transporter family, member 2b1                                                        | -2.83 |
| 1420664_s_at | NM_011171    | Procr    | protein C receptor, endothelial                                                                                    | -2.82 |
| 1449091_at   | NM_018778    | Cldn8    | claudin 8                                                                                                          | -2.82 |
| 1450872_s_at | NM_001111100 | Lipa     | lysosomal acid lipase A                                                                                            | -2.82 |
| 1427455_x_at | BI107286     |          | immunoglobulin kappa chain variable 28 (V28)                                                                       | -2.81 |
| 1449106_at   | NM_001083929 | Gpx3     | glutathione peroxidase 3                                                                                           | -2.81 |
| 1419060_at   | NM_013542    | Gzmb     | granzyme B                                                                                                         | -2.80 |
| 1418726_a_at | NM_001130174 | Tnnt2    | troponin T2, cardiac                                                                                               | -2.79 |
| 1418858_at   | NM_023617    | Aox3     | aldehyde oxidase 3                                                                                                 | -2.79 |
| 1435560_at   | NM_008400    | Itgal    | integrin alpha L                                                                                                   | -2.78 |
| 1429843_at   | NM_001099296 | Grrp1    | glycine/arginine rich protein 1                                                                                    | -2.78 |
| 1438651_a_at | NM_011784    | Aplnr    | apelin receptor                                                                                                    | -2.78 |
| 1437718_x_at | NM_021355    | Fmod     | fibromodulin                                                                                                       | -2.76 |
| 1422637_at   | NM_018750    | Rassf5   | Ras association (RalGDS/AF-6) domain family member 5                                                               | -2.76 |
| 1451204_at   | NM_001168318 | Scara5   | scavenger receptor class A, member 5 (putative)                                                                    | -2.76 |
| 1419411_at   | NM_009312    | Tac2     | tachykinin 2                                                                                                       | -2.75 |
| 1419759_at   | NM_011076    | Abcb1a   | ATP-binding cassette, sub-family B (MDR/TAP), member 1A                                                            | -2.75 |
| 1455587_at   | NM_182783    | Fam167b  | family with sequence similarity 167, member B                                                                      | -2.74 |

| Probe Set ID | Accession_ID | Gene     | Description                                                              | Fold  |
|--------------|--------------|----------|--------------------------------------------------------------------------|-------|
| 1435386_at   | NM_011708    | Vwf      | Von Willebrand factor homolog                                            | -2.74 |
| 1447808_s_at | NM_001145899 | Slc15a2  | solute carrier family 15 (H+/peptide transporter), member 2              | -2.74 |
| 1427521_a_at | NM_001164263 |          | RIKEN cDNA 9930023K05 gene                                               | -2.73 |
| 1427345_a_at | NM_133670    | Sult1a1  | sulfotransferase family 1A, phenol-preferring, member 1                  | -2.73 |
| 1425548_a_at | NM_010734    | Lst1     | leukocyte specific transcript 1                                          | -2.72 |
| 1423062_at   | NM_008343    | Igfbp3   | insulin-like growth factor binding protein 3                             | -2.70 |
| 1418674_at   | NM_011019    | Osmr     | oncostatin M receptor                                                    | -2.70 |
| 1455050_at   | NM_178791    |          | RIKEN cDNA E130203B14 gene                                               | -2.70 |
| 1433956_at   | NM_009868    | Cdh5     | cadherin 5                                                               | -2.69 |
| 1424967_x_at | NM_001130174 | Tnnt2    | troponin T2, cardiac                                                     | -2.69 |
| 1460259_s_at | NM_009899    | Clca1    | chloride channel calcium activated 1                                     | -2.69 |
| 1436739_at   | NM_177322    | Agtr1a   | angiotensin II receptor, type 1a                                         | -2.69 |
| 1460245_at   | NM_010654    | Klrd1    | killer cell lectin-like receptor, subfamily D, member 1                  | -2.69 |
| 1419309_at   | NM_010329    | Pdpr     | podoplanin                                                               | -2.66 |
| 1421653_a_at | NM_134051    |          | immunoglobulin heavy chain 2 (serum IgA)                                 | -2.65 |
| 1418204_s_at | NM_019467    | Aif1     | allograft inflammatory factor 1                                          | -2.65 |
| 1427660_x_at | BC013496     |          | immunoglobulin kappa chain variable 28 (V28)                             | -2.64 |
| 1424730_a_at | NM_001145899 | Slc15a2  | solute carrier family 15 (H+/peptide transporter), member 2              | -2.64 |
| 1434647_at   | NM_178748    | Egflam   | EGF-like, fibronectin type III and laminin G domains                     | -2.63 |
| 1420760_s_at | NM_008681    | Ndrp1    | N-myc downstream regulated gene 1                                        | -2.63 |
| 1415996_at   | NM_001009935 | Txnip    | thioredoxin interacting protein                                          | -2.62 |
| 1450731_s_at | NM_178589    | Tnfrsf21 | tumor necrosis factor receptor superfamily, member 21                    | -2.61 |
| 1417481_at   | NM_001168392 | Ramp1    | receptor (calcitonin) activity modifying protein 1                       | -2.60 |
| 1452308_a_at | NM_178405    | Atp1a2   | ATPase, Na+/K+ transporting, alpha 2 polypeptide                         | -2.60 |
| 1443823_s_at | NM_178405    | Atp1a2   | ATPase, Na+/K+ transporting, alpha 2 polypeptide                         | -2.60 |
| 1448323_a_at | NM_007542    | Bgn      | biglycan                                                                 | -2.60 |
| 1438602_s_at | NM_008555    | Masp1    | mannan-binding lectin serine peptidase 1                                 | -2.59 |
| 1425644_at   | NM_001122899 | Lepr     | leptin receptor                                                          | -2.59 |
| 1419647_a_at | NM_133662    | Ier3     | immediate early response 3                                               | -2.59 |
| 1434893_at   | NM_178405    | Atp1a2   | ATPase, Na+/K+ transporting, alpha 2 polypeptide                         | -2.59 |
| 1455452_x_at | NM_001010826 | Kctd14   | potassium channel tetramerisation domain containing 14                   | -2.58 |
| 1448433_a_at | NM_008788    | Pcolce   | procollagen C-endopeptidase enhancer protein                             | -2.58 |
| 1425763_x_at | BC019425     |          | immunoglobulin heavy chain 2 (serum IgA)                                 | -2.57 |
| 1452514_a_at | NM_001122733 | Kit      | kit oncogene                                                             | -2.57 |
| 1437685_x_at | NM_021355    | Fmod     | fibromodulin                                                             | -2.56 |
| 1424613_at   | NM_001195774 | Gprc5b   | G protein-coupled receptor, family C, group 5, member B                  | -2.56 |
| 1460632_at   | NM_133832    | Rdh10    | retinol dehydrogenase 10 (all-trans)                                     | -2.53 |
| 1423233_at   | NM_007679    | Cebpd    | CCAAT/enhancer binding protein (C/EBP), delta                            | -2.52 |
| 1437123_at   | NM_153127    | Mmrn2    | multimerin 2                                                             | -2.52 |
| 1427465_at   | NM_178405    | Atp1a2   | ATPase, Na+/K+ transporting, alpha 2 polypeptide                         | -2.51 |
| 1455271_at   | NM_001145034 |          | predicted gene 13889                                                     | -2.51 |
| 1426633_s_at | NM_001010826 | Kctd14   | potassium channel tetramerisation domain containing 14                   | -2.50 |
| 1451161_a_at | NM_010130    | Emr1     | EGF-like module containing, mucin-like, hormone receptor-like sequence 1 | -2.49 |
| 1460356_at   | NM_027102    | Esam     | endothelial cell-specific adhesion molecule                              | -2.49 |
| 1456174_x_at | NM_008681    | Ndrp1    | N-myc downstream regulated gene 1                                        | -2.48 |
| 1418059_at   | NM_133222    | Eltf1    | EGF, latrophilin seven transmembrane domain containing 1                 | -2.47 |
| 1428332_at   | NM_178149    | Pik3ip1  | phosphoinositide-3-kinase interacting protein 1                          | -2.47 |
| 1417852_x_at | NM_009899    | Clca1    | chloride channel calcium activated 1                                     | -2.47 |
| 1424034_at   | NM_013646    | Rora     | RAR-related orphan receptor alpha                                        | -2.46 |
| 1449591_at   | NM_007609    | Casp4    | caspase 4, apoptosis-related cysteine peptidase                          | -2.46 |
| 1455451_at   | NM_001010826 | Kctd14   | potassium channel tetramerisation domain containing 14                   | -2.45 |
| 1421287_a_at | NM_001032378 | Pecam1   | platelet/endothelial cell adhesion molecule 1                            | -2.44 |

| Probe Set ID | Accession_ID | Gene     | Description                                                                            | Fold  |
|--------------|--------------|----------|----------------------------------------------------------------------------------------|-------|
| 1425985_s_at | NM_008555    | Masp1    | mannan-binding lectin serine peptidase 1                                               | -2.44 |
| 1424737_at   | NM_009381    | Thrsp    | thyroid hormone responsive SPOT14 homolog (Rattus)                                     | -2.43 |
| 1450627_at   | NM_020332    | Ank      | progressive ankylosis                                                                  | -2.43 |
| 1425603_at   | NM_001098271 |          | transmembrane protein 176A                                                             | -2.43 |
| 1443937_at   | BE634648     |          |                                                                                        | -2.43 |
| 1428136_at   | NM_013834    | Sfrp1    | secreted frizzled-related protein 1                                                    | -2.42 |
| 1432579_at   | NM_025789    | Rsph3a   | radial spoke 3A homolog (Chlamydomonas)                                                | -2.42 |
| 1437378_x_at | NM_016741    | Scarb1   | scavenger receptor class B, member 1                                                   | -2.42 |
| 1423037_at   | NM_011784    | Aplnr    | apelin receptor                                                                        | -2.42 |
| 1436941_at   | NM_001134457 | Fam55c   | family with sequence similarity 55, member C                                           | -2.41 |
| 1450276_a_at | NM_001146196 | Scin     | scinderin                                                                              | -2.41 |
| 1424067_at   | NM_010493    | Icam1    | intercellular adhesion molecule 1                                                      | -2.41 |
| 1418945_at   | NM_010809    | Mmp3     | matrix metalloproteinase 3                                                             | -2.40 |
| 1422625_at   | NM_001135688 | Ly6h     | lymphocyte antigen 6 complex, locus H                                                  | -2.40 |
| 1419569_a_at | NM_001113527 | Isg20    | interferon-stimulated protein                                                          | -2.40 |
| 1420994_at   | NM_001159407 | B3gnt5   | UDP-GlcNAc:betaGal beta-1,3-N-acetylglucosaminyltransferase 5                          | -2.40 |
| 1452202_at   | NM_001008548 | Pde2a    | phosphodiesterase 2A, cGMP-stimulated                                                  | -2.39 |
| 1459989_at   | AV271189     |          |                                                                                        | -2.38 |
| 1428016_a_at | NM_028544    | Rasip1   | Ras interacting protein 1                                                              | -2.38 |
| 1455582_at   | BI156044     |          |                                                                                        | -2.37 |
| 1420788_at   | NM_016970    | Klrg1    | killer cell lectin-like receptor subfamily G, member 1                                 | -2.37 |
| 1435361_at   | NM_001025379 | Sema3g   | sema domain, immunoglobulin domain (Ig), short basic domain, secreted, (semaphorin) 3G | -2.36 |
| 1419272_at   | NM_010851    | Myd88    | myeloid differentiation primary response gene 88                                       | -2.36 |
| 1460218_at   | NM_013706    | Cd52     | CD52 antigen                                                                           | -2.36 |
| 1415856_at   | NM_010330    | Emb      | embigin                                                                                | -2.36 |
| 1429381_x_at | AK007826     |          | immunoglobulin heavy chain 2 (serum IgA)                                               | -2.35 |
| 1426171_x_at | NM_001110323 | Klra7    | killer cell lectin-like receptor, subfamily A, member 7                                | -2.35 |
| 1422632_at   | NM_009985    | Ctsw     | cathepsin W                                                                            | -2.35 |
| 1451411_at   | NM_001195774 | Gprc5b   | G protein-coupled receptor, family C, group 5, member B                                | -2.35 |
| 1416411_at   | NM_008183    | Gstm2    | glutathione S-transferase, mu 2                                                        | -2.34 |
| 1422638_s_at | NM_018750    | Rassf5   | Ras association (RalGDS/AF-6) domain family member 5                                   | -2.34 |
| 1456156_at   | NM_001122899 | Lepr     | leptin receptor                                                                        | -2.34 |
| 1420484_a_at | NM_011707    | Vtn      | vitronectin                                                                            | -2.34 |
| 1417620_at   | NM_009008    | Rac2     | RAS-related C3 botulinum substrate 2                                                   | -2.33 |
| 1440911_at   | NM_153393    | Col23a1  | collagen, type XXIII, alpha 1                                                          | -2.33 |
| 1428776_at   | NM_029415    | Slc10a6  | solute carrier family 10 (sodium/bile acid cotransporter family), member 6             | -2.33 |
| 1455961_at   | AV174022     |          |                                                                                        | -2.33 |
| 1434202_a_at | NM_183187    | Fam107a  | family with sequence similarity 107, member A                                          | -2.33 |
| 1423319_at   | NM_008245    | Hhex     | hematopoietically expressed homeobox                                                   | -2.33 |
| 1440830_at   | NM_001081178 | Gpr116   | G protein-coupled receptor 116                                                         | -2.32 |
| 1422973_a_at | NM_009381    | Thrsp    | thyroid hormone responsive SPOT14 homolog (Rattus)                                     | -2.32 |
| 1450855_at   | NM_033474    | Arvcf    | armadillo repeat gene deleted in velo-cardio-facial syndrome                           | -2.32 |
| 1455447_at   | NR_015481    |          | RIKEN cDNA D430019H16 gene                                                             | -2.32 |
| 1416405_at   | NM_007542    | Bgn      | biglycan                                                                               | -2.31 |
| 1418004_a_at | NM_001164207 | Tmem176b | transmembrane protein 176B                                                             | -2.30 |
| 1415997_at   | NM_001009935 | Txnip    | thioredoxin interacting protein                                                        | -2.30 |
| 1448562_at   | NM_001159401 | Upp1     | uridine phosphorylase 1                                                                | -2.30 |
| 1448669_at   | NM_015814    | Dkk3     | dickkopf homolog 3 (Xenopus laevis)                                                    | -2.29 |
| 1429761_at   | NM_001007596 | Rtn1     | reticulon 1                                                                            | -2.29 |
| 1418021_at   | NM_009780    | C4b      | complement component 4B (Childo blood group)                                           | -2.29 |
| 1447410_at   | BB712583     |          |                                                                                        | -2.29 |

| Probe Set ID | Accession_ID | Gene     | Description                                                                         | Fold  |
|--------------|--------------|----------|-------------------------------------------------------------------------------------|-------|
| 1434141_at   | NM_021896    | Gucy1a3  | guanylate cyclase 1, soluble, alpha 3                                               | -2.29 |
| 1434800_at   | NM_001109753 | Sv2b     | synaptic vesicle glycoprotein 2 b                                                   | -2.29 |
| 1449131_s_at | NM_007639    | Cd1d1    | CD1d1 antigen                                                                       | -2.29 |
| 1419836_at   | AU040583     |          |                                                                                     | -2.29 |
| 1426640_s_at | NM_144551    | Trib2    | tribbles homolog 2 (Drosophila)                                                     | -2.28 |
| 1452400_a_at | NR_015348    | Hoxa11as | HOXA11 antisense RNA (non-protein coding)                                           | -2.28 |
| 1417590_at   | NM_024264    | Cyp27a1  | cytochrome P450, family 27, subfamily a, polypeptide 1                              | -2.28 |
| 1448759_at   | NM_008368    | Il2rb    | interleukin 2 receptor, beta chain                                                  | -2.28 |
| 1455913_x_at | NM_013697    | Ttr      | transthyretin                                                                       | -2.28 |
| 1418340_at   | NM_010185    | Fcer1g   | Fc receptor, IgE, high affinity I, gamma polypeptide                                | -2.28 |
| 1419758_at   | NM_011076    | Abcb1a   | ATP-binding cassette, sub-family B (MDR/TAP), member 1A                             | -2.28 |
| 1437418_at   | XR_105368    | Gm3515   | predicted gene 3515                                                                 | -2.27 |
| 1427381_at   | NM_008392    | Irg1     | immunoresponsive gene 1                                                             | -2.27 |
| 1455467_at   | NM_001142781 | Fam188b  | family with sequence similarity 188, member B                                       | -2.27 |
| 1428896_at   | NM_026840    | Pdgfrr1  | platelet-derived growth factor receptor-like                                        | -2.27 |
| 1416121_at   | NM_010728    | Lox      | lysyl oxidase                                                                       | -2.25 |
| 1451031_at   | NM_016687    | Sfrp4    | secreted frizzled-related protein 4                                                 | -2.25 |
| 1436515_at   | NM_001109661 | Bach2    | BTB and CNC homology 2                                                              | -2.25 |
| 1453839_a_at | NM_023734    | Pi16     | peptidase inhibitor 16                                                              | -2.24 |
| 1416811_s_at | NM_001145799 | Ctla2a   | cytotoxic T lymphocyte-associated protein 2 alpha                                   | -2.23 |
| 1449135_at   | NM_009236    | Sox18    | SRY-box containing gene 18                                                          | -2.23 |
| 1442012_at   | AV381755     |          | expressed sequence AU015791                                                         | -2.23 |
| 1450769_s_at | NM_023377    | Stard5   | StAR-related lipid transfer (START) domain containing 5                             | -2.23 |
| 1426852_x_at | NM_010930    | Nov      | nephroblastoma overexpressed gene                                                   | -2.23 |
| 1426851_a_at | NM_010930    | Nov      | nephroblastoma overexpressed gene                                                   | -2.23 |
| 1418058_at   | NM_133222    | Eltf1    | EGF, latrophilin seven transmembrane domain containing 1                            | -2.22 |
| 1418932_at   | NM_017373    | Nfil3    | nuclear factor, interleukin 3, regulated                                            | -2.22 |
| 1418788_at   | NM_013690    | Tek      | endothelial-specific receptor tyrosine kinase                                       | -2.22 |
| 1426632_at   | NM_001010826 | Kctd14   | potassium channel tetramerisation domain containing 14                              | -2.22 |
| 1436713_s_at | NR_003633    | Meg3     | maternally expressed 3                                                              | -2.22 |
| 1428455_at   | NM_181277    | Col14a1  | collagen, type XIV, alpha 1                                                         | -2.22 |
| 1437165_a_at | NM_008788    | Pcolce   | procollagen C-endopeptidase enhancer protein                                        | -2.22 |
| 1416576_at   | NM_007707    | Socs3    | suppressor of cytokine signaling 3                                                  | -2.22 |
| 1449360_at   | NM_007781    | Csf2rb2  | colony stimulating factor 2 receptor, beta 2, low-affinity (granulocyte-macrophage) | -2.21 |
| 1447707_s_at | NM_001008548 | Pde2a    | phosphodiesterase 2A, cGMP-stimulated                                               | -2.21 |
| 1437889_x_at | NM_007542    | Bgn      | biglycan                                                                            | -2.21 |
| 1436544_at   | NM_153389    | Atp10d   | ATPase, class V, type 10D                                                           | -2.21 |
| 1419442_at   | NM_016762    | Matn2    | matrilin 2                                                                          | -2.21 |
| 1426766_at   | NM_134022    |          | RIKEN cDNA 6330403K07 gene                                                          | -2.20 |
| 1454646_at   | NM_146008    | Tcp11l2  | t-complex 11 (mouse) like 2                                                         | -2.20 |
| 1419476_at   | NM_021475    | Adamdec1 | ADAM-like, decysin 1                                                                | -2.20 |
| 1434354_at   | NM_172778    | Maob     | monoamine oxidase B                                                                 | -2.19 |
| 1423585_at   | NM_001159518 | Igfbp7   | insulin-like growth factor binding protein 7                                        | -2.19 |
| 1436279_at   | NM_145947    | Slc26a7  | solute carrier family 26, member 7                                                  | -2.19 |
| 1437324_x_at | NM_021355    | Fmod     | fibromodulin                                                                        | -2.19 |
| 1422833_at   | NM_010446    | Foxa2    | forkhead box A2                                                                     | -2.18 |
| 1452417_x_at | AV057155     |          | immunoglobulin kappa chain variable 28 (V28)                                        | -2.18 |
| 1427298_at   | NR_002870    | Dnm3os   | dynamamin 3, opposite strand                                                        | -2.18 |
| 1455422_x_at | NM_011129    |          | septin 4                                                                            | -2.17 |
| 1424596_s_at | NM_144799    | Lmcd1    | LIM and cysteine-rich domains 1                                                     | -2.17 |
| 1428394_at   | NM_172267    | Phyhd1   | phytanoyl-CoA dioxygenase domain containing 1                                       | -2.17 |
| 1460412_at   | NM_024237    | Fbln7    | fibulin 7                                                                           | -2.17 |

| Probe Set ID | Accession_ID | Gene     | Description                                                                       | Fold  |
|--------------|--------------|----------|-----------------------------------------------------------------------------------|-------|
| 1449466_at   | NM_011606    | Clec3b   | C-type lectin domain family 3, member b                                           | -2.17 |
| 1447623_s_at | NM_008858    | Prkd1    | protein kinase D1                                                                 | -2.17 |
| 1433600_at   | NM_007417    | Adra2a   | adrenergic receptor, alpha 2a                                                     | -2.17 |
| 1456014_s_at | NM_153795    | Fermt3   | fermitin family homolog 3 (Drosophila)                                            | -2.16 |
| 1417234_at   | NM_008606    | Mmp11    | matrix metalloproteinase 11                                                       | -2.16 |
| 1440343_at   | NM_153587    | Rps6ka5  | ribosomal protein S6 kinase, polypeptide 5                                        | -2.16 |
| 1417343_at   | NM_022004    | Fxyd6    | FXID domain-containing ion transport regulator 6                                  | -2.16 |
| 1419435_at   | NM_009676    | Aox1     | aldehyde oxidase 1                                                                | -2.16 |
| 1418094_s_at | NM_007607    | Car4     | carbonic anhydrase 4                                                              | -2.15 |
| 1449403_at   | NM_001163748 | Pde9a    | phosphodiesterase 9A                                                              | -2.15 |
| 1448390_a_at | NM_001172424 | Dhrs3    | dehydrogenase/reductase (SDR family) member 3                                     | -2.15 |
| 1435148_at   | NM_013415    | Atp1b2   | ATPase, Na <sup>+</sup> /K <sup>+</sup> transporting, beta 2 polypeptide          | -2.15 |
| 1458324_x_at | BB208251     |          |                                                                                   | -2.15 |
| 1440355_at   | NM_175429    | Kctd12b  | potassium channel tetramerisation domain containing 12b                           | -2.14 |
| 1427168_a_at | NM_181277    | Col14a1  | collagen, type XIV, alpha 1                                                       | -2.13 |
| 1436329_at   | NM_018781    | Egr3     | early growth response 3                                                           | -2.13 |
| 1416211_a_at | NM_008973    | Ptn      | pleiotrophin                                                                      | -2.13 |
| 1435026_at   | NM_052994    | Spock2   | sparc/osteonectin, cwcv and kazal-like domains proteoglycan 2                     | -2.13 |
| 1428922_at   | NM_025817    |          | RIKEN cDNA 1200009O22 gene                                                        | -2.13 |
| 1454880_s_at | NM_138313    | Bmf      | BCL2 modifying factor                                                             | -2.13 |
| 1435040_at   | NM_028679    | Irak3    | interleukin-1 receptor-associated kinase 3                                        | -2.13 |
| 1454967_at   | NM_029870    |          | RIKEN cDNA A930001N09 gene                                                        | -2.12 |
| 1449065_at   | NM_012006    | Acot1    | acyl-CoA thioesterase 1                                                           | -2.12 |
| 1419706_a_at | NM_031185    | Akap12   | A kinase (PRKA) anchor protein (gravin) 12                                        | -2.11 |
| 1460444_at   | NM_177231    | Arrb1    | arrestin, beta 1                                                                  | -2.11 |
| 1423915_at   | NM_177068    | Olfml2b  | olfactomedin-like 2B                                                              | -2.11 |
| 1425400_a_at | NM_019563    | Cited4   | Cbp/p300-interacting transactivator, with Glu/Asp-rich carboxy-terminal domain, 4 | -2.11 |
| 1431213_a_at | XM_001477842 | Gm3579   | predicted gene 3579                                                               | -2.11 |
| 1419040_at   | NM_001163472 | Cyp2d22  | cytochrome P450, family 2, subfamily d, polypeptide 22                            | -2.11 |
| 1457825_x_at | NM_001130458 | Tcn2     | transcobalamin 2                                                                  | -2.10 |
| 1455251_at   | NM_001033228 | Itga1    | integrin alpha 1                                                                  | -2.10 |
| 1419589_at   | NM_010740    | Cd93     | CD93 antigen                                                                      | -2.10 |
| 1451978_at   | NM_010729    | Loxl1    | lysyl oxidase-like 1                                                              | -2.10 |
| 1416050_a_at | NM_016741    | Scarb1   | scavenger receptor class B, member 1                                              | -2.10 |
| 1427351_s_at | BB226392     | Igh-6    | immunoglobulin heavy chain 6 (heavy chain of IgM)                                 | -2.10 |
| 1434140_at   | NM_001159485 | Mcf2l    | mcf.2 transforming sequence-like                                                  | -2.09 |
| 1447725_at   | BE948505     |          | RIKEN cDNA C030034E14 gene                                                        | -2.09 |
| 1456768_a_at | NM_153127    | Mmrn2    | multimerin 2                                                                      | -2.09 |
| 1452264_at   | NM_153533    | Tenc1    | tensin like C1 domain-containing phosphatase                                      | -2.09 |
| 1428651_at   | NM_029436    | Klhl24   | kelch-like 24 (Drosophila)                                                        | -2.09 |
| 1449368_at   | NM_001190451 | Dcn      | decorin                                                                           | -2.09 |
| 1449528_at   | NM_010216    | Figf     | c-fos induced growth factor                                                       | -2.09 |
| 1419833_s_at | NM_139206    | Arap3    | ArfGAP with RhoGAP domain, ankyrin repeat and PH domain 3                         | -2.08 |
| 1424305_at   | NM_152839    | Igj      | immunoglobulin joining chain                                                      | -2.08 |
| 1453486_a_at | NM_020052    | Scube2   | signal peptide, CUB domain, EGF-like 2                                            | -2.07 |
| 1421571_a_at | NM_001099217 |          | lymphocyte antigen 6 complex, locus C1                                            | -2.07 |
| 1460255_at   | NM_033622    | Tnfsf13b | tumor necrosis factor (ligand) superfamily, member 13b                            | -2.07 |
| 1426886_at   | NM_001033242 | Cln5     | ceroid-lipofuscinosis, neuronal 5                                                 | -2.07 |
| 1428988_at   | NM_029600    | Abcc3    | ATP-binding cassette, sub-family C (CFTR/MRP), member 3                           | -2.07 |
| 1455137_at   | NM_175930    | Rapgef5  | Rap guanine nucleotide exchange factor (GEF) 5                                    | -2.07 |
| 1455820_x_at | NM_016741    | Scarb1   | scavenger receptor class B, member 1                                              | -2.07 |
| 1460163_at   | NM_001135172 | C1qtnf7  | C1q and tumor necrosis factor related protein 7                                   | -2.06 |

| Probe Set ID | Accession_ID | Gene      | Description                                                                       | Fold  |
|--------------|--------------|-----------|-----------------------------------------------------------------------------------|-------|
| 1431050_at   | NM_153587    | Rps6ka5   | ribosomal protein S6 kinase, polypeptide 5                                        | -2.06 |
| 1428460_at   | NM_001111015 | Syn2      | synapsin II                                                                       | -2.06 |
| 1459557_at   | BM115255     |           |                                                                                   | -2.06 |
| 1417898_a_at | NM_010370    | Gzma      | granzyme A                                                                        | -2.06 |
| 1453285_at   | NM_025915    | Tmem88    | transmembrane protein 88                                                          | -2.06 |
| 1436196_at   | BE691546     |           | hypothetical protein C030046G05                                                   | -2.05 |
| 1415855_at   | NM_013598    | Kitl      | kit ligand                                                                        | -2.05 |
| 1415857_at   | NM_010330    | Emb       | embigin                                                                           | -2.05 |
| 1424824_at   | NM_198014    | Slain1    | SLAIN motif family, member 1                                                      | -2.05 |
| 1422997_s_at | NM_012006    |           | acyl-CoA thioesterase 1                                                           | -2.05 |
| 1433942_at   | NM_001039546 | Myo6      | myosin VI                                                                         | -2.05 |
| 1437967_at   | NM_001025576 | Ccdc141   | coiled-coil domain containing 141                                                 | -2.05 |
| 1429022_at   | NM_001025372 | Adcyap1r1 | adenylate cyclase activating polypeptide 1 receptor 1                             | -2.05 |
| 1429097_at   | NM_177378    | Rnf150    | ring finger protein 150                                                           | -2.05 |
| 1454866_s_at | NM_172469    | Clic6     | chloride intracellular channel 6                                                  | -2.05 |
| 1447806_s_at | NM_019684    | Srpk3     | serine/arginine-rich protein specific kinase 3                                    | -2.05 |
| 1416164_at   | NM_011812    | Fbln5     | fibulin 5                                                                         | -2.05 |
| 1447936_at   | NR_030738    |           | RIKEN cDNA 2410006H16 gene                                                        | -2.04 |
| 1456111_at   | NM_172921    | Fam55d    | family with sequence similarity 55, member D                                      | -2.04 |
| 1435459_at   | NM_018881    | Fmo2      | flavin containing monooxygenase 2                                                 | -2.04 |
| 1419182_at   | NM_022814    | Svep1     | sushi, von Willebrand factor type A, EGF and pentraxin domain containing 1        | -2.04 |
| 1419132_at   | NM_011905    | Tlr2      | toll-like receptor 2                                                              | -2.04 |
| 1426968_a_at | NM_133832    | Rdh10     | retinol dehydrogenase 10 (all-trans)                                              | -2.04 |
| 1419315_at   | NM_029612    | Slamf9    | SLAM family member 9                                                              | -2.03 |
| 1423140_at   | NM_001111100 | Lipa      | lysosomal acid lipase A                                                           | -2.03 |
| 1433907_at   | NM_001029838 | Pknox2    | Pbx/knotted 1 homeobox 2                                                          | -2.03 |
| 1441506_at   | NM_001190451 | Dcn       | decorin                                                                           | -2.03 |
| 1448862_at   | NM_010494    | Icam2     | intercellular adhesion molecule 2                                                 | -2.03 |
| 1436501_at   | NM_001005863 | Mtus1     | mitochondrial tumor suppressor 1                                                  | -2.03 |
| 1416255_at   | NM_008120    | Gja4      | gap junction protein, alpha 4                                                     | -2.03 |
| 1417220_at   | NM_010176    | Fah       | fumarylacetoacetate hydrolase                                                     | -2.02 |
| 1425582_a_at | NM_001163522 | Emcn      | endomucin                                                                         | -2.02 |
| 1448737_at   | NM_019634    | Tspan7    | tetraspanin 7                                                                     | -2.02 |
| 1418186_at   | NM_008185    | Gstt1     | glutathione S-transferase, theta 1                                                | -2.01 |
| 1435547_at   | NM_001122667 | Mkl2      | MKL/myocardin-like 2                                                              | -2.01 |
| 1431211_s_at | NM_025416    | Them5     | thioesterase superfamily member 5                                                 | -2.01 |
| 1426285_at   | NM_008481    | Lama2     | laminin, alpha 2                                                                  | -2.01 |
| 1458642_at   | NM_153590    | Klre1     | killer cell lectin-like receptor family E member 1                                | -2.01 |
| 1435603_at   | NM_172463    | Sned1     | sushi, nidogen and EGF-like domains 1                                             | -2.01 |
| 1456532_at   | NM_027924    | Pdgfd     | platelet-derived growth factor, D polypeptide                                     | -2.01 |
| 1436312_at   | NM_001025597 | Ikzf1     | IKAROS family zinc finger 1                                                       | -2.01 |
| 1435701_at   | NM_144853    | Cypr1     | cysteine and tyrosine-rich protein 1                                              | -2.01 |
| 1450770_at   | NM_026142    |           | RIKEN cDNA 3632451O06 gene                                                        | -2.00 |
| 1455869_at   | BG862223     |           |                                                                                   | -2.00 |
| 1450698_at   | NM_010090    | Dusp2     | dual specificity phosphatase 2                                                    | -1.99 |
| 1449037_at   | NM_001110850 | Crem      | cAMP responsive element modulator                                                 | -1.99 |
| 1457094_at   | NM_172530    | She       | src homology 2 domain-containing transforming protein E                           | -1.99 |
| 1422622_at   | NM_008713    | Nos3      | nitric oxide synthase 3, endothelial cell                                         | -1.99 |
| 1421326_at   | NM_007780    | Csf2rb    | colony stimulating factor 2 receptor, beta, low-affinity (granulocyte-macrophage) | -1.99 |
| 1426251_at   | NM_153107    | Cpz       | carboxypeptidase Z                                                                | -1.99 |
| 1448823_at   | NM_001012477 | Cxcl12    | chemokine (C-X-C motif) ligand 12                                                 | -1.98 |
| 1451428_x_at | NM_001164564 | Egfl7     | EGF-like domain 7                                                                 | -1.98 |

| Probe Set ID | Accession_ID | Gene     | Description                                                                                   | Fold  |
|--------------|--------------|----------|-----------------------------------------------------------------------------------------------|-------|
| 1416101_a_at | NM_015786    | Hist1h1c | histone cluster 1, H1c                                                                        | -1.98 |
| 1455542_at   | NR_027923    |          | RIKEN cDNA C630043F03 gene                                                                    | -1.98 |
| 1436555_at   | NM_001044740 | Slc7a2   | solute carrier family 7 (cationic amino acid transporter, y+ system), member 2                | -1.98 |
| 1452244_at   | NM_027519    |          | RIKEN cDNA 6330406115 gene                                                                    | -1.97 |
| 1449079_s_at | NM_018784    | St3gal6  | ST3 beta-galactoside alpha-2,3-sialyltransferase 6                                            | -1.97 |
| 1418796_at   | NM_009131    | Clec11a  | C-type lectin domain family 11, member a                                                      | -1.97 |
| 1437785_at   | NM_175314    | Adamts9  | a disintegrin-like and metallopeptidase (reprolysin type) with thrombospondin type 1 motif, 9 | -1.97 |
| 1415935_at   | NM_022315    | Smoc2    | SPARC related modular calcium binding 2                                                       | -1.97 |
| 1448883_at   | NM_011175    | Lgmn     | legumain                                                                                      | -1.97 |
| 1451453_at   | NM_010019    | Dapk2    | death-associated protein kinase 2                                                             | -1.97 |
| 1455090_at   | NM_011923    | Angptl2  | angiopoietin-like 2                                                                           | -1.97 |
| 1449475_at   | NM_138652    | Atp12a   | ATPase, H+/K+ transporting, nongastric, alpha polypeptide                                     | -1.96 |
| 1437308_s_at | NM_010169    | F2r      | coagulation factor II (thrombin) receptor                                                     | -1.96 |
| 1429831_at   | NM_031376    | Pik3ap1  | phosphoinositide-3-kinase adaptor protein 1                                                   | -1.96 |
| 1438954_x_at | NM_010216    | Figf     | c-fos induced growth factor                                                                   | -1.96 |
| 1451332_at   | NM_145492    | Zfp521   | zinc finger protein 521                                                                       | -1.96 |
| 1418162_at   | NM_021297    | Tlr4     | toll-like receptor 4                                                                          | -1.96 |
| 1435385_at   | NM_080455    | Tshz2    | teashirt zinc finger family member 2                                                          | -1.96 |
| 1429178_at   | NM_001145937 | Odz3     | odd Oz/ten-m homolog 3 (Drosophila)                                                           | -1.96 |
| 1442077_at   | BB197581     |          | RIKEN cDNA 2310076G05 gene                                                                    | -1.96 |
| 1424807_at   | NM_010681    | Lama4    | laminin, alpha 4                                                                              | -1.95 |
| 1426235_a_at | NM_008131    | Glul     | glutamate-ammonia ligase (glutamine synthetase)                                               | -1.95 |
| 1423061_at   | NM_033474    | Arvcf    | armadillo repeat gene deleted in velo-cardio-facial syndrome                                  | -1.95 |
| 1438966_x_at | NM_021355    | Fmod     | fibromodulin                                                                                  | -1.95 |
| 1452191_at   | NM_028243    | Prpc     | prolylcarboxypeptidase (angiotensinase C)                                                     | -1.95 |
| 1422952_at   | NM_023893    | Ng23     | Ng23 protein                                                                                  | -1.95 |
| 1449078_at   | NM_018784    | St3gal6  | ST3 beta-galactoside alpha-2,3-sialyltransferase 6                                            | -1.95 |
| 1427891_at   | NM_153175    | Gimap6   | GTPase, IMAP family member 6                                                                  | -1.95 |
| 1433741_at   | NM_007646    | Cd38     | CD38 antigen                                                                                  | -1.94 |
| 1457156_at   | NM_146241    | Trhde    | TRH-degrading enzyme                                                                          | -1.94 |
| 1454086_a_at | NM_001142335 | Lmo2     | LIM domain only 2                                                                             | -1.94 |
| 1416203_at   | NM_007472    | Aqp1     | aquaporin 1                                                                                   | -1.94 |
| 1450753_at   | NM_024253    | Nkg7     | natural killer cell group 7 sequence                                                          | -1.93 |
| 1438672_at   | NM_133167    | Parvb    | parvin, beta                                                                                  | -1.93 |
| 1427371_at   | NM_153145    | Abca8a   | ATP-binding cassette, sub-family A (ABC1), member 8a                                          | -1.93 |
| 1449805_at   | NM_053260    | Prss29   | Protease, serine, 29                                                                          | -1.93 |
| 1457141_at   | BB229969     |          |                                                                                               | -1.93 |
| 1452352_at   | NM_001145801 | Ctla2b   | cytotoxic T lymphocyte-associated protein 2 beta                                              | -1.92 |
| 1455660_at   | NM_007780    | Csf2rb   | colony stimulating factor 2 receptor, beta, low-affinity (granulocyte-macrophage)             | -1.92 |
| 1436939_at   | NM_178680    | Unc45b   | unc-45 homolog B (C. elegans)                                                                 | -1.92 |
| 1420388_at   | NM_008939    | Prss12   | protease, serine, 12 neurotrypsin (motopsin)                                                  | -1.92 |
| 1418483_a_at | NM_001145821 | Ggta1    | glycoprotein galactosyltransferase alpha 1, 3                                                 | -1.92 |
| 1455899_x_at | NM_007707    | Socs3    | suppressor of cytokine signaling 3                                                            | -1.92 |
| 1423844_s_at | NM_144855    | Cbs      | cystathionine beta-synthase                                                                   | -1.92 |
| 1437360_at   | NM_001105245 | Pcdh19   | protocadherin 19                                                                              | -1.92 |
| 1427074_at   | NM_153594    | Pcmt2    | protein-L-isoaspartate (D-aspartate) O-methyltransferase domain containing 2                  | -1.92 |
| 1449169_at   | NM_008216    | Has2     | hyaluronan synthase 2                                                                         | -1.92 |
| 1423909_at   | NM_001098271 | Tmem176a | transmembrane protein 176A                                                                    | -1.92 |
| 1418981_at   | NM_009808    | Casp12   | caspase 12                                                                                    | -1.91 |
| 1444260_at   | BF661746     |          |                                                                                               | -1.91 |



| Probe Set ID | Accession_ID | Gene    | Description                                              | Fold  |
|--------------|--------------|---------|----------------------------------------------------------|-------|
| 1426624_a_at | NM_025347    | Ypel3   | yippee-like 3 (Drosophila)                               | -1.91 |
| 1418098_at   | NM_080435    | Adcy4   | adenylate cyclase 4                                      | -1.91 |
| 1423467_at   | NM_021718    | Ms4a4b  | membrane-spanning 4-domains, subfamily A, member 4B      | -1.91 |
| 1435823_x_at | NM_001164564 | Egfl7   | EGF-like domain 7                                        | -1.91 |
| 1456629_at   | NM_030697    | Kank3   | KN motif and ankyrin repeat domains 3                    | -1.91 |
| 1435805_at   | NM_001033223 | Lin7a   | lin-7 homolog A (C. elegans)                             | -1.90 |
| 1450798_at   | NM_031176    | Tnxb    | tenascin XB                                              | -1.90 |
| 1433939_at   | NM_010678    | Aff3    | AF4/FMR2 family, member 3                                | -1.90 |
| 1437595_at   | NM_183160    |         | RIKEN cDNA E030010A14 gene                               | -1.90 |
| 1435559_at   | NM_001039546 | Myo6    | myosin VI                                                | -1.90 |
| 1429159_at   | NM_172471    | Itih5   | inter-alpha (globulin) inhibitor H5                      | -1.90 |
| 1434939_at   | NM_010426    | Foxf1a  | forkhead box F1a                                         | -1.89 |
| 1452937_s_at | NM_025455    | Ccdc28b | coiled coil domain containing 28B                        | -1.89 |
| 1456061_at   | NM_001077410 | Gimap8  | GTPase, IMAP family member 8                             | -1.89 |
| 1424375_s_at | NM_174990    | Gimap4  | GTPase, IMAP family member 4                             | -1.89 |
| 1452905_at   | NR_003633    | Meg3    | maternally expressed 3                                   | -1.89 |
| 1431413_at   | NM_001168392 | Ramp1   | receptor (calcitonin) activity modifying protein 1       | -1.89 |
| 1449389_at   | NM_011527    | Tal1    | T-cell acute lymphocytic leukemia 1                      | -1.89 |
| 1419358_at   | NM_030889    | Sorcs2  | sortilin-related VPS10 domain containing receptor 2      | -1.89 |
| 1448529_at   | NM_009378    | Thbd    | thrombomodulin                                           | -1.88 |
| 1451019_at   | NM_019861    | Ctsf    | cathepsin F                                              | -1.88 |
| 1426758_s_at | NR_003633    | Meg3    | maternally expressed 3                                   | -1.88 |
| 1435060_at   | NM_001038710 | Tmod2   | tropomodulin 2                                           | -1.88 |
| 1450958_at   | NM_008536    | Tm4sf1  | transmembrane 4 superfamily member 1                     | -1.88 |
| 1426206_at   | NM_028783    | Robo4   | roundabout homolog 4 (Drosophila)                        | -1.88 |
| 1427038_at   | NM_001002927 | Penk    | preproenkephalin                                         | -1.88 |
| 1424265_at   | NM_028749    | Npl     | N-acetylneuraminate pyruvate lyase                       | -1.87 |
| 1450663_at   | NM_011581    | Thbs2   | thrombospondin 2                                         | -1.87 |
| 1442025_a_at | AI467657     |         |                                                          | -1.87 |
| 1424763_at   | NM_029338    | Rsph9   | radial spoke head 9 homolog (Chlamydomonas)              | -1.87 |
| 1456046_at   | NM_010740    | Cd93    | CD93 antigen                                             | -1.87 |
| 1426734_at   | NM_177632    | Fam43a  | family with sequence similarity 43, member A             | -1.87 |
| 1419292_at   | NM_001042615 | Htra3   | HtrA serine peptidase 3                                  | -1.87 |
| 1429185_at   | NM_001081295 |         | RIKEN cDNA 4631416L12 gene                               | -1.87 |
| 1427240_at   | NM_177030    | Dock6   | dedicator of cytokinesis 6                               | -1.87 |
| 1433455_at   | NM_008507    | Sh2b3   | SH2B adaptor protein 3                                   | -1.87 |
| 1423555_a_at | NM_133871    | Ifi44   | interferon-induced protein 44                            | -1.87 |
| 1450044_at   | NM_008057    | Fzd7    | frizzled homolog 7 (Drosophila)                          | -1.86 |
| 1421037_at   | NM_008719    | Npas2   | neuronal PAS domain protein 2                            | -1.86 |
| 1435511_at   | NM_001111015 | Syn2    | synapsin II                                              | -1.86 |
| 1450641_at   | NM_011701    | Vim     | vimentin                                                 | -1.86 |
| 1428547_at   | NM_011851    | Nt5e    | 5' nucleotidase, ecto                                    | -1.86 |
| 1428942_at   | NM_008630    | Mt2     | metallothionein 2                                        | -1.86 |
| 1434873_a_at | NM_153788    | Acap1   | ArfGAP with coiled-coil, ankyrin repeat and PH domains 1 | -1.86 |
| 1434457_at   | NM_013673    | Sp100   | nuclear antigen Sp100                                    | -1.86 |
| 1449988_at   | NM_008376    | Gimap1  | GTPase, IMAP family member 1                             | -1.86 |
| 1439096_at   | NM_027442    | Ddo     | D-aspartate oxidase                                      | -1.85 |
| 1427329_a_at | AI326478     | Igh-6   | immunoglobulin heavy chain 6 (heavy chain of IgM)        | -1.85 |
| 1449852_a_at | NM_133838    | Ehd4    | EH-domain containing 4                                   | -1.85 |
| 1420459_at   | NM_133229    | Ripply3 | rippy3 homolog (zebrafish)                               | -1.85 |
| 1452330_a_at | NM_024263    | Mxra8   | matrix-remodelling associated 8                          | -1.85 |
| 1451069_at   | NM_145478    | Pim3    | proviral integration site 3                              | -1.85 |
| 1421840_at   | NM_013454    | Abca1   | ATP-binding cassette, sub-family A (ABC1), member 1      | -1.85 |

| Probe Set ID | Accession_ID | Gene     | Description                                                                             | Fold  |
|--------------|--------------|----------|-----------------------------------------------------------------------------------------|-------|
| 1438684_at   | NM_001004363 | Nuak1    | NUAK family, SNF1-like kinase, 1                                                        | -1.85 |
| 1455466_at   | NM_001081342 | Gpr133   | G protein-coupled receptor 133                                                          | -1.85 |
| 1424289_at   | NM_145950    | Osgin2   | oxidative stress induced growth inhibitor family member 2                               | -1.85 |
| 1436044_at   | NM_009135    | Scn7a    | sodium channel, voltage-gated, type VII, alpha                                          | -1.85 |
| 1450678_at   | NM_008404    | Itgb2    | integrin beta 2                                                                         | -1.85 |
| 1451500_at   | NM_181418    | Ushbp1   | Usher syndrome 1C binding protein 1                                                     | -1.85 |
| 1428393_at   | NM_153529    | Nrn1     | neuritin 1                                                                              | -1.85 |
| 1423946_at   | NM_145978    | Pdlim2   | PDZ and LIM domain 2                                                                    | -1.85 |
| 1436324_at   | XM_001004201 | Stard9   | START domain containing 9                                                               | -1.84 |
| 1439789_at   | NM_007897    | Ebf1     | early B-cell factor 1                                                                   | -1.84 |
| 1432517_a_at | NM_010924    | Nnmt     | nicotinamide N-methyltransferase                                                        | -1.84 |
| 1429987_at   | NM_030728    |          | RIKEN cDNA 9930013L23 gene                                                              | -1.84 |
| 1426743_at   | NM_145220    | Appl2    | adaptor protein, phosphotyrosine interaction, PH domain and leucine zipper containing 2 | -1.84 |
| 1416371_at   | NM_007470    | Apod     | apolipoprotein D                                                                        | -1.84 |
| 1438972_x_at | NR_030682    |          | RIKEN cDNA 2810410L24 gene                                                              | -1.84 |
| 1449878_a_at | NM_133648    | Slc12a6  | solute carrier family 12, member 6                                                      | -1.84 |
| 1418207_at   | NM_001173372 | Fxyd4    | FXDY domain-containing ion transport regulator 4                                        | -1.84 |
| 1421006_at   | NM_053185    | Col4a6   | collagen, type IV, alpha 6                                                              | -1.84 |
| 1423135_at   | NM_009382    | Thy1     | thymus cell antigen 1, theta                                                            | -1.83 |
| 1422557_s_at | NM_013602    | Mt1      | metallothionein 1                                                                       | -1.83 |
| 1452834_at   | NM_001083810 | Prr5l    | proline rich 5 like                                                                     | -1.83 |
| 1437181_at   | NM_033602    | Peli2    | pellino 2                                                                               | -1.83 |
| 1451611_at   | NM_139269    | Pla2g16  | phospholipase A2, group XVI                                                             | -1.83 |
| 1418257_at   | NM_011390    | Slc12a7  | solute carrier family 12, member 7                                                      | -1.83 |
| 1417801_a_at | NM_001163557 | Ppfibp2  | PTPRF interacting protein, binding protein 2 (liprin beta 2)                            | -1.83 |
| 1449146_at   | NM_010929    | Notch4   | Notch gene homolog 4 (Drosophila)                                                       | -1.83 |
| 1437241_at   | NM_178357    | Klf11    | Kruppel-like factor 11                                                                  | -1.83 |
| 1434248_at   | NM_008856    | Prkch    | protein kinase C, eta                                                                   | -1.83 |
| 1432176_a_at | NM_001146348 | Eng      | endoglin                                                                                | -1.82 |
| 1451604_a_at | NM_009612    | Acvr1l   | activin A receptor, type II-like 1                                                      | -1.82 |
| 1434188_at   | NM_172838    | Slc16a12 | solute carrier family 16 (monocarboxylic acid transporters), member 12                  | -1.82 |
| 1419128_at   | NM_021334    | Itgax    | integrin alpha X                                                                        | -1.82 |
| 1429954_at   | NM_153197    | Clec4a3  | C-type lectin domain family 4, member a3                                                | -1.82 |
| 1416246_a_at | NM_009898    | Coro1a   | coronin, actin binding protein 1A                                                       | -1.82 |
| 1430302_at   | NM_029861    | Cnrip1   | cannabinoid receptor interacting protein 1                                              | -1.82 |
| 1422673_at   | NM_008858    | Prkd1    | protein kinase D1                                                                       | -1.82 |
| 1416069_at   | NM_019703    | Pfkip    | phosphofructokinase, platelet                                                           | -1.81 |
| 1451336_at   | NM_010706    | Lgals4   | lectin, galactose binding, soluble 4                                                    | -1.81 |
| 1453022_at   | NM_026730    | Gpihbp1  | GPI-anchored HDL-binding protein 1                                                      | -1.81 |
| 1416111_at   | NM_009856    | Cd83     | CD83 antigen                                                                            | -1.81 |
| 1437197_at   | NM_172752    | Sorbs2   | sorbin and SH3 domain containing 2                                                      | -1.81 |
| 1432566_at   | NM_030106    | Tmsb15a  | thymosin beta 15a                                                                       | -1.81 |
| 1422545_at   | NM_009324    | Tbx2     | T-box 2                                                                                 | -1.81 |
| 1433762_at   | NR_027923    |          | RIKEN cDNA C630043F03 gene                                                              | -1.81 |
| 1439622_at   | NM_178045    | Rassf4   | Ras association (RalGDS/AF-6) domain family member 4                                    | -1.81 |
| 1449408_at   | NM_023844    | Jam2     | junction adhesion molecule 2                                                            | -1.81 |
| 1440527_at   | BI440542     |          |                                                                                         | -1.81 |
| 1426127_x_at | NM_053153    | Klra18   | killer cell lectin-like receptor, subfamily A, member 18                                | -1.81 |
| 1417148_at   | NM_001146268 | Pdgrfb   | platelet derived growth factor receptor, beta polypeptide                               | -1.81 |
| 1416625_at   | NM_009776    | Serping1 | serine (or cysteine) peptidase inhibitor, clade G, member 1                             | -1.80 |
| 1457321_at   | XM_001474094 |          | RIKEN cDNA D130037M23 gene                                                              | -1.80 |
| 1421899_a_at | NM_008209    | Mr1      | major histocompatibility complex, class I-related                                       | -1.80 |

| Probe Set ID | Accession_ID | Gene      | Description                                                                                   | Fold  |
|--------------|--------------|-----------|-----------------------------------------------------------------------------------------------|-------|
| 1436948_a_at | NM_172930    | Fam70a    | family with sequence similarity 70, member A                                                  | -1.80 |
| 1420617_at   | NM_026252    | Cpeb4     | cytoplasmic polyadenylation element binding protein 4                                         | -1.80 |
| 1454699_at   | NM_001013370 | Sesn1     | sestrin 1                                                                                     | -1.80 |
| 1417185_at   | NM_010738    | Ly6a      | lymphocyte antigen 6 complex, locus A                                                         | -1.80 |
| 1434411_at   | NM_007730    | Col12a1   | collagen, type XII, alpha 1                                                                   | -1.80 |
| 1423584_at   | NM_001159518 | Igfbp7    | insulin-like growth factor binding protein 7                                                  | -1.80 |
| 1435265_at   | XR_105720    |           | hypothetical LOC100504698                                                                     | -1.79 |
| 1454942_at   | NM_022018    | Fam129a   | family with sequence similarity 129, member A                                                 | -1.79 |
| 1437661_at   | NM_001033220 | AU021092  | expressed sequence AU021092                                                                   | -1.79 |
| 1421007_at   | NM_053185    | Col4a6    | collagen, type IV, alpha 6                                                                    | -1.79 |
| 1416416_x_at | NM_010358    | Gstm1     | glutathione S-transferase, mu 1                                                               | -1.79 |
| 1433711_s_at | NM_001013370 | Sesn1     | sestrin 1                                                                                     | -1.79 |
| 1459903_at   | NM_011352    | Sema7a    | sema domain, immunoglobulin domain (Ig), and GPI membrane anchor, (semaphorin) 7A             | -1.79 |
| 1422710_a_at | NM_001163691 | Cacna1h   | calcium channel, voltage-dependent, T type, alpha 1H subunit                                  | -1.79 |
| 1424010_at   | NM_029568    | Mfap4     | microfibrillar-associated protein 4                                                           | -1.79 |
| 1456295_at   | BB304874     |           | RIKEN cDNA B230114P17 gene                                                                    | -1.79 |
| 1441584_at   | BB555654     |           |                                                                                               | -1.79 |
| 1427005_at   | NM_152804    | Plk2      | polo-like kinase 2 (Drosophila)                                                               | -1.78 |
| 1433525_at   | NM_010332    | Ednra     | endothelin receptor type A                                                                    | -1.78 |
| 1460227_at   | NM_001044384 | Timp1     | tissue inhibitor of metalloproteinase 1                                                       | -1.78 |
| 1427405_s_at | NM_001003955 | Rab11fip5 | RAB11 family interacting protein 5 (class I)                                                  | -1.78 |
| 1435435_at   | NM_080285    | Cttnbp2   | cortactin binding protein 2                                                                   | -1.78 |
| 1448293_at   | NM_007897    | Ebf1      | early B-cell factor 1                                                                         | -1.78 |
| 1439518_at   | NM_153127    | Mmrn2     | multimerin 2                                                                                  | -1.78 |
| 1417066_at   | NM_001163290 | Adck3     | aarF domain containing kinase 3                                                               | -1.78 |
| 1417312_at   | NM_015814    | Dkk3      | dickkopf homolog 3 (Xenopus laevis)                                                           | -1.78 |
| 1435254_at   | NM_172775    | Plxnb1    | plexin B1                                                                                     | -1.78 |
| 1420819_at   | NM_001029841 | Sla       | src-like adaptor                                                                              | -1.78 |
| 1438648_x_at | NM_026860    | Gkn3      | gastrokine 3                                                                                  | -1.78 |
| 1452595_at   | NM_172845    | Adamts4   | a disintegrin-like and metallopeptidase (reprolysin type) with thrombospondin type 1 motif, 4 | -1.78 |
| 1423890_x_at | NM_009721    | Atp1b1    | ATPase, Na <sup>+</sup> /K <sup>+</sup> transporting, beta 1 polypeptide                      | -1.78 |
| 1460700_at   | NM_011486    | Stat3     | signal transducer and activator of transcription 3                                            | -1.78 |
| 1449461_at   | NM_022020    | Rbp7      | retinol binding protein 7, cellular                                                           | -1.78 |
| 1435600_s_at | NM_145536    |           | cDNA sequence BC020535                                                                        | -1.78 |
| 1455269_a_at | NM_009898    | Coro1a    | coronin, actin binding protein 1A                                                             | -1.78 |
| 1416318_at   | NM_025429    | Serpib1a  | serine (or cysteine) peptidase inhibitor, clade B, member 1a                                  | -1.77 |
| 1455398_at   | NM_133897    | Lrrc8c    | leucine rich repeat containing 8 family, member C                                             | -1.77 |
| 1457025_at   | NM_001080710 | Sdr16c6   | short chain dehydrogenase/reductase family 16C, member 6                                      | -1.77 |
| 1456144_at   | NM_001081035 | Nav3      | neuron navigator 3                                                                            | -1.77 |
| 1417933_at   | NM_008344    | Igfbp6    | insulin-like growth factor binding protein 6                                                  | -1.77 |
| 1418478_at   | NM_057173    | Lmo1      | LIM domain only 1                                                                             | -1.77 |
| 1434997_at   | NM_001168304 | Cdk19     | cyclin-dependent kinase 19                                                                    | -1.77 |
| 1436367_at   | NM_029928    | Ptprb     | protein tyrosine phosphatase, receptor type, B                                                | -1.77 |
| 1425822_a_at | NM_008052    | Dtx1      | deltex 1 homolog (Drosophila)                                                                 | -1.77 |
| 1441975_at   | NM_019807    | Acpp      | acid phosphatase, prostate                                                                    | -1.77 |
| 1451355_at   | NM_139306    | Acer2     | alkaline ceramidase 2                                                                         | -1.77 |
| 1415983_at   | NM_008879    | Lcp1      | lymphocyte cytosolic protein 1                                                                | -1.77 |
| 1433902_at   | NM_001008785 | Kbtbd8    | kelch repeat and BTB (POZ) domain containing 8                                                | -1.77 |
| 1418163_at   | NM_021297    | Tlr4      | toll-like receptor 4                                                                          | -1.77 |
| 1416194_at   | NM_007823    | Cyp4b1    | cytochrome P450, family 4, subfamily b, polypeptide 1                                         | -1.77 |
| 1435935_at   | NM_001081236 |           | RIKEN cDNA 2410131K14 gene                                                                    | -1.77 |
| 1450065_at   | NM_001037723 | Adcy7     | adenylate cyclase 7                                                                           | -1.77 |

| Probe Set ID | Accession_ID | Gene      | Description                                                                                     | Fold  |
|--------------|--------------|-----------|-------------------------------------------------------------------------------------------------|-------|
| 1460011_at   | NM_001177713 | Cyp26b1   | cytochrome P450, family 26, subfamily b, polypeptide 1                                          | -1.77 |
| 1428479_at   | NM_001164109 | Nfatc1    | nuclear factor of activated T-cells, cytoplasmic, calcineurin-dependent 1                       | -1.77 |
| 1434756_at   | AV292354     |           | hypothetical protein 5430421B17                                                                 | -1.77 |
| 1449310_at   | NM_008964    | Ptger2    | prostaglandin E receptor 2 (subtype EP2)                                                        | -1.77 |
| 1449297_at   | NM_009808    | Casp12    | caspase 12                                                                                      | -1.77 |
| 1436448_a_at | NM_008969    | Ptgs1     | prostaglandin-endoperoxide synthase 1                                                           | -1.77 |
| 1451340_at   | NM_001172205 | Arid5a    | AT rich interactive domain 5A (MRF1-like)                                                       | -1.77 |
| 1428426_s_at | NM_001013025 | Tgfbra1   | transforming growth factor, beta receptor associated protein 1                                  | -1.77 |
| 1449455_at   | NM_001172117 | Hck       | hemopoietic cell kinase                                                                         | -1.76 |
| 1460180_at   | NM_010422    | Hexb      | hexosaminidase B                                                                                | -1.76 |
| 1460578_at   | NM_172731    | Fgd5      | FYVE, RhoGEF and PH domain containing 5                                                         | -1.76 |
| 1416136_at   | NM_008610    | Mmp2      | matrix metalloproteinase 2                                                                      | -1.76 |
| 1440244_at   | NM_133659    | Erg       | avian erythroblastosis virus E-26 (v-ets) oncogene related                                      | -1.76 |
| 1450429_at   | NM_007603    | Capn6     | calpain 6                                                                                       | -1.76 |
| 1416488_at   | NM_007635    | Ccng2     | cyclin G2                                                                                       | -1.76 |
| 1428750_at   | NM_026772    | Cdc42ep2  | CDC42 effector protein (Rho GTPase binding) 2                                                   | -1.76 |
| 1427944_at   | NM_181541    | Caprin2   | caprin family member 2                                                                          | -1.76 |
| 1428662_a_at | NM_001159900 | Hopx      | HOP homeobox                                                                                    | -1.76 |
| 1419056_at   | NM_001025364 | Rtn2      | reticulon 2 (Z-band associated protein)                                                         | -1.76 |
| 1448617_at   | NM_007651    | Cd53      | CD53 antigen                                                                                    | -1.75 |
| 1421965_s_at | NM_008716    | Notch3    | Notch gene homolog 3 (Drosophila)                                                               | -1.75 |
| 1415949_at   | NM_013494    | Cpe       | carboxypeptidase E                                                                              | -1.75 |
| 1416926_at   | NM_021897    | Trp53inp1 | transformation related protein 53 inducible nuclear protein 1                                   | -1.75 |
| 1418758_a_at | NM_001163548 | Cyth3     | cytohesin 3                                                                                     | -1.75 |
| 1423718_at   | NM_021299    | Ak3       | adenylate kinase 3                                                                              | -1.75 |
| 1460302_at   | NM_011580    | Thbs1     | thrombospondin 1                                                                                | -1.75 |
| 1454824_s_at | NM_001005863 | Mtus1     | mitochondrial tumor suppressor 1                                                                | -1.75 |
| 1422906_at   | NM_011920    | Abcg2     | ATP-binding cassette, sub-family G (WHITE), member 2                                            | -1.75 |
| 1424699_at   | NM_145574    | Ccdc136   | coiled-coil domain containing 136                                                               | -1.74 |
| 1428391_at   | NM_144538    | Rab3il1   | RAB3A interacting protein (rabin3)-like 1                                                       | -1.74 |
| 1448681_at   | NM_008358    | Il15ra    | interleukin 15 receptor, alpha chain                                                            | -1.74 |
| 1452183_a_at | NR_003633    | Meg3      | maternally expressed 3                                                                          | -1.74 |
| 1455965_at   | NM_172845    | Adamts4   | a disintegrin-like and metalloproteinase (reprolysin type) with thrombospondin type 1 motif, 4  | -1.74 |
| 1432332_a_at | NM_033080    | Nudt19    | nudix (nucleoside diphosphate linked moiety X)-type motif 19                                    | -1.74 |
| 1427007_at   | NM_028773    | Sash3     | SAM and SH3 domain containing 3                                                                 | -1.74 |
| 1448715_x_at | NM_009834    |           | SH3-domain GRB2-like (endophilin) interacting protein 1                                         | -1.74 |
| 1417291_at   | NM_011609    | Tnfrsf1a  | tumor necrosis factor receptor superfamily, member 1a                                           | -1.74 |
| 1436568_at   | NM_023844    | Jam2      | junction adhesion molecule 2                                                                    | -1.74 |
| 1423484_at   | NM_031397    | Bicc1     | bicaudal C homolog 1 (Drosophila)                                                               | -1.74 |
| 1433780_at   | NM_026666    | Ubn1      | ubinuclein 1                                                                                    | -1.74 |
| 1418109_at   | NM_008179    | Gspt2     | G1 to S phase transition 2                                                                      | -1.74 |
| 1460242_at   | NM_010016    | Cd55      | CD55 antigen                                                                                    | -1.74 |
| 1426708_at   | NM_133738    | Antxr2    | anthrax toxin receptor 2                                                                        | -1.74 |
| 1417816_s_at | NM_012032    | Serinc3   | serine incorporator 3                                                                           | -1.74 |
| 1435059_at   | BM937495     |           |                                                                                                 | -1.74 |
| 1437451_at   | NM_001033141 | Ecscr     | endothelial cell-specific chemotaxis regulator                                                  | -1.74 |
| 1427056_at   | NM_001024139 | Adamts15  | a disintegrin-like and metalloproteinase (reprolysin type) with thrombospondin type 1 motif, 15 | -1.74 |
| 1449141_at   | NM_001163256 | Fblim1    | filamin binding LIM protein 1                                                                   | -1.74 |
| 1442033_at   | NM_183175    | C1qtnf9   | C1q and tumor necrosis factor related protein 9                                                 | -1.74 |
| 1458933_at   | NM_001039371 | Slc22a15  | solute carrier family 22 (organic anion/cation transporter), member 15                          | -1.74 |

| Probe Set ID | Accession_ID | Gene      | Description                                                                   | Fold  |
|--------------|--------------|-----------|-------------------------------------------------------------------------------|-------|
| 1422124_a_at | NM_001111316 | Ptpnc     | protein tyrosine phosphatase, receptor type, C                                | -1.73 |
| 1448688_at   | NM_013723    | Podxl     | podocalyxin-like                                                              | -1.73 |
| 1438705_at   | NM_001109873 | Cbfa2t3   | core-binding factor, runt domain, alpha subunit 2, translocated to, 3 (human) | -1.73 |
| 1419380_at   | NM_033327    | Zfp423    | zinc finger protein 423                                                       | -1.73 |
| 1448321_at   | NM_001146217 | Smoc1     | SPARC related modular calcium binding 1                                       | -1.73 |
| 1429286_at   | NM_026860    | Gkn3      | gastrokine 3                                                                  | -1.73 |
| 1449130_at   | NM_007639    | Cd1d1     | CD1d1 antigen                                                                 | -1.73 |
| 1422562_at   | NM_019662    | Rrad      | Ras-related associated with diabetes                                          | -1.73 |
| 1449363_at   | NM_007498    | Atf3      | activating transcription factor 3                                             | -1.73 |
| 1424443_at   | NM_145375    | Tm6sf1    | transmembrane 6 superfamily member 1                                          | -1.73 |
| 1459679_s_at | NM_001161817 | Myo1b     | myosin IB                                                                     | -1.73 |
| 1443870_at   | NM_001033336 | Abcc4     | ATP-binding cassette, sub-family C (CFTR/MRP), member 4                       | -1.73 |
| 1441305_at   | NM_001114386 | Nedd4l    | neural precursor cell expressed, developmentally down-regulated gene 4-like   | -1.73 |
| 1419674_a_at | NM_007876    | Dpep1     | dipeptidase 1 (renal)                                                         | -1.73 |
| 1436819_at   | NM_001177323 |           | septin 6                                                                      | -1.73 |
| 1433501_at   | NM_177662    | Ctso      | cathepsin O                                                                   | -1.73 |
| 1422822_at   | NM_023377    | Stard5    | StAR-related lipid transfer (START) domain containing 5                       | -1.73 |
| 1449533_at   | NM_026433    | Tmem100   | transmembrane protein 100                                                     | -1.73 |
| 1443906_at   | NM_010016    | Cd55      | CD55 antigen                                                                  | -1.73 |
| 1439380_x_at | NR_003633    | Meg3      | maternally expressed 3                                                        | -1.72 |
| 1445597_s_at | NM_139269    | Pla2g16   | phospholipase A2, group XVI                                                   | -1.72 |
| 1426063_a_at | NM_010276    | Gem       | GTP binding protein (gene overexpressed in skeletal muscle)                   | -1.72 |
| 1436346_at   | NM_153098    | Cd109     | CD109 antigen                                                                 | -1.72 |
| 1428452_at   | NR_027984    |           | RIKEN cDNA 2810025M15 gene                                                    | -1.72 |
| 1434115_at   | NM_019707    | Cdh13     | cadherin 13                                                                   | -1.72 |
| 1434501_at   | NM_001005342 | Ypel4     | yippee-like 4 (Drosophila)                                                    | -1.72 |
| 1448557_at   | NM_001143776 | Fam13c    | family with sequence similarity 13, member C                                  | -1.72 |
| 1430520_at   | NM_001033851 | Cpne8     | copine VIII                                                                   | -1.72 |
| 1450852_s_at | NM_010169    | F2r       | coagulation factor II (thrombin) receptor                                     | -1.72 |
| 1451691_at   | NM_010332    | Ednra     | endothelin receptor type A                                                    | -1.72 |
| 1426510_at   | NM_178653    | Sccpdh    | saccharopine dehydrogenase (putative)                                         | -1.72 |
| 1418651_at   | NM_026470    | Spata6    | spermatogenesis associated 6                                                  | -1.72 |
| 1416978_at   | NM_010189    | Fcgrt     | Fc receptor, IgG, alpha chain transporter                                     | -1.72 |
| 1451152_a_at | NM_009721    | Atp1b1    | ATPase, Na <sup>+</sup> /K <sup>+</sup> transporting, beta 1 polypeptide      | -1.72 |
| 1428334_at   | NM_172416    | Ostm1     | osteopetrosis associated transmembrane protein 1                              | -1.72 |
| 1434474_at   | NM_147219    | Abca5     | ATP-binding cassette, sub-family A (ABC1), member 5                           | -1.72 |
| 1442051_at   | NM_178216    | Hist2h3c1 | histone cluster 2, H3c1                                                       | -1.72 |
| 1434069_at   | NM_177782    | Prex1     | phosphatidylinositol-3,4,5-trisphosphate-dependent Rac exchange factor 1      | -1.72 |
| 1439866_at   | NM_001081335 | Cul9      | cullin 9                                                                      | -1.72 |
| 1426937_at   | NM_027519    |           | RIKEN cDNA 6330406115 gene                                                    | -1.71 |
| 1449314_at   | NM_011766    | Zfpm2     | zinc finger protein, multitype 2                                              | -1.71 |
| 1418983_at   | NM_001005784 | Inadl     | InaD-like (Drosophila)                                                        | -1.71 |
| 1448117_at   | NM_013598    | Kitl      | kit ligand                                                                    | -1.71 |
| 1441972_at   | BE949277     |           | RIKEN cDNA 6230424C14 gene                                                    | -1.71 |
| 1427287_s_at | NM_010586    | Itpr2     | inositol 1,4,5-triphosphate receptor 2                                        | -1.71 |
| 1434478_at   | NM_001033432 | Heca      | headcase homolog (Drosophila)                                                 | -1.71 |
| 1436101_at   | NM_178607    | Rnf24     | ring finger protein 24                                                        | -1.71 |
| 1417780_at   | NM_026058    | Lass4     | LAG1 homolog, ceramide synthase 4                                             | -1.71 |
| 1438532_at   | NM_001024720 | Hmcn1     | hemicentin 1                                                                  | -1.71 |
| 1439117_at   | NM_001040682 | Clmn      | calmin                                                                        | -1.71 |
| 1434033_at   | NM_011599    | Tle1      | transducin-like enhancer of split 1, homolog of Drosophila E(spl)             | -1.71 |

| Probe Set ID | Accession_ID | Gene     | Description                                                                                       | Fold  |
|--------------|--------------|----------|---------------------------------------------------------------------------------------------------|-------|
| 1431777_a_at | NM_026122    | Hmgn3    | high mobility group nucleosomal binding domain 3                                                  | -1.71 |
| 1416053_at   | NM_008516    | Lrrn1    | leucine rich repeat protein 1, neuronal                                                           | -1.71 |
| 1426724_at   | NM_028044    | Cnn3     | calponin 3, acidic                                                                                | -1.71 |
| 1434283_at   | NM_023598    | Arid5b   | AT rich interactive domain 5B (MRF1-like)                                                         | -1.71 |
| 1426221_at   | NM_001145957 | Vwa5a    | von Willebrand factor A domain containing 5A                                                      | -1.71 |
| 1418417_at   | NM_010827    | Msc      | musculin                                                                                          | -1.71 |
| 1454727_at   | NM_178928    | Afap111  | actin filament associated protein 1-like 1                                                        | -1.71 |
| 1426368_at   | NM_028724    | Rin2     | Ras and Rab interactor 2                                                                          | -1.71 |
| 1418762_at   | NM_010016    | Cd55     | CD55 antigen                                                                                      | -1.70 |
| 1418406_at   | NM_008803    | Pde8a    | phosphodiesterase 8A                                                                              | -1.70 |
| 1454613_at   | NM_001136086 | Dpysl3   | dihydropyrimidinase-like 3                                                                        | -1.70 |
| 1415776_at   | NM_007437    | Aldh3a2  | aldehyde dehydrogenase family 3, subfamily A2                                                     | -1.70 |
| 1455316_x_at | XM_915804    |          | cDNA sequence BC094435                                                                            | -1.70 |
| 1448330_at   | NM_010358    | Gstm1    | glutathione S-transferase, mu 1                                                                   | -1.70 |
| 1424383_at   | NM_145402    | Tmem51   | transmembrane protein 51                                                                          | -1.70 |
| 1454708_at   | NM_001103177 | Ablim1   | actin-binding LIM protein 1                                                                       | -1.70 |
| 1448200_at   | NM_001130458 | Tcn2     | transcobalamin 2                                                                                  | -1.70 |
| 1456220_at   | NM_176959    | Fbxl7    | F-box and leucine-rich repeat protein 7                                                           | -1.70 |
| 1451353_at   | NM_145375    | Tm6sf1   | transmembrane 6 superfamily member 1                                                              | -1.70 |
| 1434903_s_at | NM_133193    | Il1rl2   | interleukin 1 receptor-like 2                                                                     | -1.70 |
| 1416759_at   | NM_001164433 | Mical1   | microtubule associated monooxygenase, calponin and LIM domain containing 1                        | -1.70 |
| 1418181_at   | NM_001166388 | Ptp4a3   | protein tyrosine phosphatase 4a3                                                                  | -1.69 |
| 1449025_at   | NM_010501    | Ifit3    | interferon-induced protein with tetratricopeptide repeats 3                                       | -1.69 |
| 1448709_at   | NM_001080819 | Arid1a   | AT rich interactive domain 1A (SWI-like)                                                          | -1.69 |
| 1449124_at   | NM_016846    | Rgl1     | ral guanine nucleotide dissociation stimulator,-like 1                                            | -1.69 |
| 1456934_at   | NM_009788    | Calb1    | calbindin 1                                                                                       | -1.69 |
| 1435084_at   | BB200607     |          | RIKEN cDNA C730049O14 gene                                                                        | -1.69 |
| 1460580_at   | NM_018814    | Pcnx     | pecanex homolog (Drosophila)                                                                      | -1.69 |
| 1441811_x_at | NM_001098271 | Tmem176a | transmembrane protein 176A                                                                        | -1.69 |
| 1418511_at   | NM_019759    | Dpt      | dermatopontin                                                                                     | -1.69 |
| 1439827_at   | NM_175501    | Adamts12 | a disintegrin-like and metallopeptidase (reprolysin type) with thrombospondin type 1 motif, 12    | -1.69 |
| 1422013_at   | NM_001170332 | Clec4a2  | C-type lectin domain family 4, member a2                                                          | -1.69 |
| 1417702_a_at | NM_080462    | Hnmt     | histamine N-methyltransferase                                                                     | -1.69 |
| 1427054_s_at | NM_001014399 | Abi3bp   | ABI gene family, member 3 (NESH) binding protein                                                  | -1.69 |
| 1436029_at   | NM_031397    | Bicc1    | bicaudal C homolog 1 (Drosophila)                                                                 | -1.69 |
| 1437498_at   | BB327336     | Gm9971   | predicted gene 9971                                                                               | -1.69 |
| 1427996_at   | NM_153513    | BC028528 | cDNA sequence BC028528                                                                            | -1.69 |
| 1451229_at   | NM_144919    | Hdac11   | histone deacetylase 11                                                                            | -1.69 |
| 1430526_a_at | NM_011416    | Smarca2  | SWI/SNF related, matrix associated, actin dependent regulator of chromatin, subfamily a, member 2 | -1.69 |
| 1449491_at   | NM_130859    | Card10   | caspase recruitment domain family, member 10                                                      | -1.69 |
| 1428508_at   | NM_194334    | Tbc1d2b  | TBC1 domain family, member 2B                                                                     | -1.69 |
| 1436223_at   | NM_177290    | Itgb8    | integrin beta 8                                                                                   | -1.69 |
| 1417785_at   | NM_134102    | Pla1a    | phospholipase A1 member A                                                                         | -1.68 |
| 1450816_at   | NM_015810    | Polg2    | polymerase (DNA directed), gamma 2, accessory subunit                                             | -1.68 |
| 1449027_at   | NM_133955    | Rhou     | ras homolog gene family, member U                                                                 | -1.68 |
| 1456307_s_at | NM_001037723 | Adcy7    | adenylate cyclase 7                                                                               | -1.68 |
| 1417174_at   | NM_025464    | Tmem218  | transmembrane protein 218                                                                         | -1.68 |
| 1435943_at   | NM_007876    | Dpep1    | dipeptidase 1 (renal)                                                                             | -1.68 |
| 1456978_s_at | NM_027559    |          | DNA segment, Chr 19, ERATO Doi 652, expressed                                                     | -1.68 |
| 1446014_at   | AU067791     |          |                                                                                                   | -1.68 |
| 1421217_a_at | NM_001159301 | Lgals9   | lectin, galactose binding, soluble 9                                                              | -1.68 |

| Probe Set ID | Accession_ID | Gene     | Description                                                         | Fold  |
|--------------|--------------|----------|---------------------------------------------------------------------|-------|
| 1456890_at   | NM_172689    | Ddx58    | DEAD (Asp-Glu-Ala-Asp) box polypeptide 58                           | -1.68 |
| 1429351_at   | NM_029436    | Klhl24   | kelch-like 24 (Drosophila)                                          | -1.68 |
| 1453070_at   | NM_001013753 | Pcdh17   | protocadherin 17                                                    | -1.68 |
| 1424968_at   | NM_197999    | Ces2g    | carboxylesterase 2G                                                 | -1.67 |
| 1423326_at   | NM_009848    | Entpd1   | ectonucleoside triphosphate diphosphohydrolase 1                    | -1.67 |
| 1420362_a_at | NM_007546    | Bik      | BCL2-interacting killer                                             | -1.67 |
| 1433787_at   | NM_001037906 | Nell1    | NEL-like 1 (chicken)                                                | -1.67 |
| 1424834_s_at | NM_010586    | Itpr2    | inositol 1,4,5-triphosphate receptor 2                              | -1.67 |
| 1452014_a_at | NM_001111274 | Igf1     | insulin-like growth factor 1                                        | -1.67 |
| 1442026_at   | AI467657     |          |                                                                     | -1.67 |
| 1435902_at   | NM_153136    | Nudt18   | nudix (nucleoside diphosphate linked moiety X)-type motif 18        | -1.67 |
| 1434548_at   | NM_012032    | Serinc3  | serine incorporator 3                                               | -1.67 |
| 1448559_at   | NM_008027    | Flot1    | flotillin 1                                                         | -1.67 |
| 1417277_at   | NM_024442    | Cyp4f16  | cytochrome P450, family 4, subfamily f, polypeptide 16              | -1.67 |
| 1436755_at   | NM_172471    | Itih5    | inter-alpha (globulin) inhibitor H5                                 | -1.67 |
| 1435880_at   | NM_001167883 | Ankrd50  | ankyrin repeat domain 50                                            | -1.67 |
| 1436520_at   | XM_003085583 | Ahnak2   | AHNAK nucleoprotein 2                                               | -1.67 |
| 1426236_a_at | NM_008131    | Glul     | glutamate-ammonia ligase (glutamine synthetase)                     | -1.66 |
| 1439537_at   | BG071024     |          |                                                                     | -1.66 |
| 1435911_s_at | NM_178934    | Slc2a12  | solute carrier family 2 (facilitated glucose transporter), member12 | -1.66 |
| 1451475_at   | NM_026376    | Plxnd1   | plexin D1                                                           | -1.66 |
| 1433632_at   | NM_001164598 | Irf2bp2  | interferon regulatory factor 2 binding protein 2                    | -1.66 |
| 1423450_a_at | NM_010474    | Hs3st1   | heparan sulfate (glucosamine) 3-O-sulfotransferase 1                | -1.66 |
| 1436171_at   | NM_001005508 | Arhgap30 | Rho GTPase activating protein 30                                    | -1.66 |
| 1422645_at   | NM_010424    | Hfe      | hemochromatosis                                                     | -1.66 |
| 1428284_at   | NM_001001986 |          | RIKEN cDNA 8430427H17 gene                                          | -1.66 |
| 1416195_at   | NM_008916    | Inpp5k   | inositol polyphosphate 5-phosphatase K                              | -1.66 |
| 1435195_at   | NM_177354    | Vash1    | vasohibin 1                                                         | -1.66 |
| 1439925_at   | BQ031166     |          |                                                                     | -1.66 |
| 1452657_at   | NM_026887    | Ap1s2    | adaptor-related protein complex 1, sigma 2 subunit                  | -1.66 |
| 1416766_at   | NM_133684    | Mosc2    | MOCO sulphurase C-terminal domain containing 2                      | -1.66 |
| 1451782_a_at | NM_022880    | Slc29a1  | solute carrier family 29 (nucleoside transporters), member 1        | -1.66 |
| 1458659_at   | NM_207229    |          | predicted gene 10393 /// placenta specific 9                        | -1.66 |
| 1433745_at   | NM_001081302 | Trio     | triple functional domain (PTPRF interacting)                        | -1.66 |
| 1443250_at   | NM_009061    | Rgs2     | regulator of G-protein signaling 2                                  | -1.66 |
| 1434931_at   | NM_001042752 | Neo1     | neogenin                                                            | -1.66 |
| 1434581_at   | NM_026629    |          | RIKEN cDNA 2410066E13 gene                                          | -1.66 |
| 1448118_a_at | NM_009983    | Ctsd     | cathepsin D                                                         | -1.66 |
| 1435771_at   | NM_013829    | Plcb4    | phospholipase C, beta 4                                             | -1.66 |
| 1452952_at   | NM_001081289 |          | RIKEN cDNA 9030418K01 gene                                          | -1.65 |
| 1425646_at   | NM_145497    |          | cDNA sequence BC016495                                              | -1.65 |
| 1438704_at   | NM_001039048 | Trim63   | tripartite motif-containing 63                                      | -1.65 |
| 1425594_at   | NM_011836    | Lamc3    | laminin gamma 3                                                     | -1.65 |
| 1452296_at   | NM_011412    | Slit3    | slit homolog 3 (Drosophila)                                         | -1.65 |
| 1426818_at   | NM_001042592 | Arrdc4   | arrestin domain containing 4                                        | -1.65 |
| 1455164_at   | NM_020260    | Arhgap31 | Rho GTPase activating protein 31                                    | -1.65 |
| 1457038_at   | NM_172862    | Frem2    | Fras1 related extracellular matrix protein 2                        | -1.65 |
| 1423717_at   | NM_021299    | Ak3      | adenylate kinase 3                                                  | -1.65 |
| 1426971_at   | NM_023738    | Uba7     | ubiquitin-like modifier activating enzyme 7                         | -1.65 |
| 1435221_at   | NM_001197321 | Foxp1    | forkhead box P1                                                     | -1.65 |
| 1456603_at   | NM_029658    | Fam101b  | family with sequence similarity 101, member B                       | -1.65 |
| 1460367_at   | NM_153198    | Hbp1     | high mobility group box transcription factor 1                      | -1.65 |
| 1438886_at   | NM_013905    | Heyl     | hairy/enhancer-of-split related with YRPW motif-like                | -1.65 |

| Probe Set ID | Accession_ID | Gene     | Description                                                         | Fold  |
|--------------|--------------|----------|---------------------------------------------------------------------|-------|
| 1416302_at   | NM_007897    | Ebf1     | early B-cell factor 1                                               | -1.65 |
| 1416238_at   | NM_011587    | Tie1     | tyrosine kinase with immunoglobulin-like and EGF-like domains 1     | -1.65 |
| 1434856_at   | NM_001081433 | Ankrd44  | ankyrin repeat domain 44                                            | -1.64 |
| 1448525_a_at | NM_009761    | Bnip3l   | BCL2/adenovirus E1B interacting protein 3-like                      | -1.64 |
| 1434067_at   | NR_015519    | AI662270 | expressed sequence AI662270                                         | -1.64 |
| 1420919_at   | NM_001037759 | Sgk3     | serum/glucocorticoid regulated kinase 3                             | -1.64 |
| 1448754_at   | NM_011254    | Rbp1     | retinol binding protein 1, cellular                                 | -1.64 |
| 1425678_a_at | NM_001164572 | Snrk     | SNF related kinase                                                  | -1.64 |
| 1436913_at   | NM_001080818 | Cdc14a   | CDC14 cell division cycle 14 homolog A (S. cerevisiae)              | -1.64 |
| 1442698_at   | BB252728     |          |                                                                     | -1.64 |
| 1428717_at   | NM_027268    | Scrn1    | secernin 1                                                          | -1.64 |
| 1457170_at   | NM_001033371 | Lrrc36   | leucine rich repeat containing 36                                   | -1.64 |
| 1438756_at   | NM_001190371 | Ankrd29  | ankyrin repeat domain 29                                            | -1.64 |
| 1449022_at   | NM_016701    | Nes      | nestin                                                              | -1.64 |
| 1426238_at   | NM_009755    | Bmp1     | bone morphogenetic protein 1                                        | -1.64 |
| 1425475_at   | NM_001163155 | Col4a5   | collagen, type IV, alpha 5                                          | -1.64 |
| 1434500_at   | NM_053273    | Ttyh2    | tweety homolog 2 (Drosophila)                                       | -1.64 |
| 1448201_at   | NM_009144    | Sfrp2    | secreted frizzled-related protein 2                                 | -1.64 |
| 1457052_at   | NM_001081134 | Kcng1    | potassium voltage-gated channel, subfamily G, member 1              | -1.64 |
| 1450792_at   | NM_011662    | Tyrobp   | TYRO protein tyrosine kinase binding protein                        | -1.64 |
| 1451174_at   | NM_146069    | Lrrc33   | leucine rich repeat containing 33                                   | -1.64 |
| 1423805_at   | NM_001008702 | Dab2     | disabled homolog 2 (Drosophila)                                     | -1.64 |
| 1423586_at   | NM_001190974 | Axl      | AXL receptor tyrosine kinase                                        | -1.64 |
| 1418400_at   | NM_026235    | Larp6    | La ribonucleoprotein domain family, member 6                        | -1.64 |
| 1435668_at   | NM_024203    | Fam120b  | family with sequence similarity 120, member B                       | -1.64 |
| 1430522_a_at | NM_001080742 | Vamp5    | vesicle-associated membrane protein 5                               | -1.63 |
| 1435387_at   | NM_001033633 | Slc2a13  | solute carrier family 2 (facilitated glucose transporter), member13 | -1.63 |
| 1416708_a_at | NM_027898    | Gramd1a  | GRAM domain containing 1A                                           | -1.63 |
| 1428211_at   | NM_028944    | P4htm    | prolyl 4-hydroxylase, transmembrane (endoplasmic reticulum)         | -1.63 |
| 1448839_at   | NM_030697    | Kank3    | KN motif and ankyrin repeat domains 3                               | -1.63 |
| 1437113_s_at | NM_001164056 | Plid1    | phospholipase D1                                                    | -1.63 |
| 1427301_at   | NM_007649    | Cd48     | CD48 antigen                                                        | -1.63 |
| 1456212_x_at | NM_007707    | Socs3    | suppressor of cytokine signaling 3                                  | -1.63 |
| 1433512_at   | NM_008026    | Fli1     | Friend leukemia integration 1                                       | -1.63 |
| 1417601_at   | NM_015811    | Rgs1     | regulator of G-protein signaling 1                                  | -1.63 |
| 1429181_at   | NM_001081275 |          | RIKEN cDNA 1700009P17 gene                                          | -1.63 |
| 1421335_a_at | NM_001164564 | Egfl7    | EGF-like domain 7                                                   | -1.63 |
| 1416554_at   | NM_016861    | Pdlim1   | PDZ and LIM domain 1 (elfin)                                        | -1.63 |
| 1452418_at   | BF719154     |          | RIKEN cDNA 1200016E24 gene                                          | -1.63 |
| 1437584_at   | BE685667     |          |                                                                     | -1.63 |
| 1449514_at   | NM_018869    | Grk5     | G protein-coupled receptor kinase 5                                 | -1.63 |
| 1448864_at   | NM_001164572 | Snrk     | SNF related kinase                                                  | -1.63 |
| 1451139_at   | NM_028064    | Slc39a4  | solute carrier family 39 (zinc transporter), member 4               | -1.63 |
| 1434010_at   | NM_001037725 | Fam117b  | family with sequence similarity 117, member B                       | -1.63 |
| 1420295_x_at | NM_016691    | Clcn5    | chloride channel 5                                                  | -1.63 |
| 1451758_at   | NM_011836    | Lamc3    | laminin gamma 3                                                     | -1.63 |
| 1418322_at   | NM_001110850 | Crem     | cAMP responsive element modulator                                   | -1.63 |
| 1416895_at   | NM_001162425 | Efna1    | ephrin A1                                                           | -1.62 |
| 1451121_a_at | NM_133831    | Gltscr2  | glioma tumor suppressor candidate region gene 2                     | -1.62 |
| 1437100_x_at | NM_145478    | Pim3     | proviral integration site 3                                         | -1.62 |
| 1435343_at   | NM_175291    | Dock10   | dedicator of cytokinesis 10                                         | -1.62 |
| 1454048_a_at | NM_027627    |          | RIKEN cDNA 4931408A02 gene                                          | -1.62 |
| 1459348_at   | BB454472     |          |                                                                     | -1.62 |



| Probe Set ID | Accession_ID | Gene     | Description                                                               | Fold  |
|--------------|--------------|----------|---------------------------------------------------------------------------|-------|
| 1424549_at   | NM_001171002 | Degs2    | degenerative spermatocyte homolog 2 (Drosophila), lipid desaturase        | -1.62 |
| 1439787_at   | NM_001038839 | P2rx7    | purinergic receptor P2X, ligand-gated ion channel, 7                      | -1.62 |
| 1420872_at   | NM_001161796 | Gucy1b3  | guanylate cyclase 1, soluble, beta 3                                      | -1.62 |
| 1422079_at   | NM_008856    | Prkch    | protein kinase C, eta                                                     | -1.62 |
| 1428375_at   | NR_015524    |          | RIKEN cDNA 4932415G12 gene                                                | -1.62 |
| 1423994_at   | NM_008441    | Kif1b    | kinesin family member 1B                                                  | -1.62 |
| 1428769_at   | NM_001163421 | Tatdn3   | TatD DNase domain containing 3                                            | -1.62 |
| 1428954_at   | NM_023055    | Slc9a3r2 | solute carrier family 9 (sodium/hydrogen exchanger), member 3 regulator 2 | -1.62 |
| 1416125_at   | NM_010220    | Fkbp5    | FK506 binding protein 5                                                   | -1.62 |
| 1455010_at   | NM_001081005 |          | RIKEN cDNA 1500012F01 gene                                                | -1.62 |
| 1437364_at   | NM_172687    | Coq3     | coenzyme Q3 homolog, methyltransferase (yeast)                            | -1.62 |
| 1435348_at   | BQ177188     |          | RIKEN cDNA D930009K15 gene                                                | -1.62 |
| 1422479_at   | NM_019811    | Acss2    | acyl-CoA synthetase short-chain family member 2                           | -1.62 |
| 1428083_at   | NR_003513    | Neat1    | nuclear paraspeckle assembly transcript 1 (non-protein coding)            | -1.62 |
| 1435172_at   | NM_001164789 | Eomes    | eomesodermin homolog (Xenopus laevis)                                     | -1.62 |
| 1452666_a_at | NM_178874    | Tmcc2    | transmembrane and coiled-coil domains 2                                   | -1.62 |
| 1423893_x_at | NM_009685    | Apbb1    | amyloid beta (A4) precursor protein-binding, family B, member 1           | -1.62 |
| 1448538_a_at | NM_023665    | D4Wsu53e | DNA segment, Chr 4, Wayne State University 53, expressed                  | -1.62 |
| 1425140_at   | NM_145381    | Lactb2   | lactamase, beta 2                                                         | -1.62 |
| 1426587_a_at | NM_011486    | Stat3    | signal transducer and activator of transcription 3                        | -1.61 |
| 1439364_a_at | NM_008610    | Mmp2     | matrix metalloproteinase 2                                                | -1.61 |
| 1458969_at   | BG069506     |          | expressed sequence AU019559                                               | -1.61 |
| 1420558_at   | NM_011347    | Selp     | selectin, platelet                                                        | -1.61 |
| 1448181_at   | NM_023184    | Klf15    | Kruppel-like factor 15                                                    | -1.61 |
| 1454748_at   | NM_172607    | Naprt1   | nicotinate phosphoribosyltransferase domain containing 1                  | -1.61 |
| 1429030_at   | NM_001135172 | C1qtnf7  | C1q and tumor necrosis factor related protein 7                           | -1.61 |
| 1435342_at   | NM_001033525 | Kcnk6    | potassium inwardly-rectifying channel, subfamily K, member 6              | -1.61 |
| 1425396_a_at | NM_001162432 | Lck      | lymphocyte protein tyrosine kinase                                        | -1.61 |
| 1433801_at   | NM_001004155 |          | RIKEN cDNA 9930012K11 gene                                                | -1.61 |
| 1423695_at   | NM_145537    | Edem2    | ER degradation enhancer, mannosidase alpha-like 2                         | -1.61 |
| 1435144_at   | BM243379     |          |                                                                           | -1.61 |
| 1418471_at   | NM_008827    | Pgf      | placental growth factor                                                   | -1.61 |
| 1436043_at   | NM_009135    | Scn7a    | sodium channel, voltage-gated, type VII, alpha                            | -1.61 |
| 1425109_at   | NM_145394    | Slc44a3  | solute carrier family 44, member 3                                        | -1.61 |
| 1446812_at   | XM_001474844 | Gm2818   | Predicted gene 2818                                                       | -1.61 |
| 1454711_at   | NM_001081302 | Trio     | triple functional domain (PTPRF interacting)                              | -1.61 |
| 1434413_at   | NM_001111274 | Igf1     | insulin-like growth factor 1                                              | -1.61 |
| 1416432_at   | NM_001177752 | Pfkfb3   | 6-phosphofructo-2-kinase/fructose-2,6-biphosphatase 3                     | -1.61 |
| 1435748_at   | NM_010266    | Gda      | guanine deaminase                                                         | -1.61 |
| 1435256_at   | NM_001081114 | Clip3    | CAP-GLY domain containing linker protein 3                                | -1.61 |
| 1424186_at   | NM_026439    | Ccdc80   | coiled-coil domain containing 80                                          | -1.61 |
| 1452382_at   | NR_002870    | Dnm3os   | dynamamin 3, opposite strand                                              | -1.61 |
| 1429144_at   | NM_001042671 | Gpcpd1   | glycerophosphocholine phosphodiesterase GDE1 homolog (S. cerevisiae)      | -1.61 |
| 1434216_a_at | NM_033080    | Nudt19   | nudix (nucleoside diphosphate linked moiety X)-type motif 19              | -1.61 |
| 1434360_s_at | NM_008981    | Ptprg    | protein tyrosine phosphatase, receptor type, G                            | -1.61 |
| 1417273_at   | NM_013743    | Pdk4     | pyruvate dehydrogenase kinase, isoenzyme 4                                | -1.61 |
| 1431335_a_at | NM_023395    | Wfdc1    | WAP four-disulfide core domain 1                                          | -1.61 |
| 1452985_at   | NM_028283    | Uaca     | uveal autoantigen with coiled-coil domains and ankyrin repeats            | -1.61 |
| 1427053_at   | NM_001014399 | Abi3bp   | ABI gene family, member 3 (NESH) binding protein                          | -1.61 |
| 1436562_at   | NM_172689    | Ddx58    | DEAD (Asp-Glu-Ala-Asp) box polypeptide 58                                 | -1.60 |
| 1433993_at   | NM_172741    |          | RIKEN cDNA 4931406P16 gene                                                | -1.60 |

| Probe Set ID | Accession_ID | Gene     | Description                                                                                    | Fold  |
|--------------|--------------|----------|------------------------------------------------------------------------------------------------|-------|
| 1435941_at   | NM_139228    | Rhbdl3   | rhomboid, veinlet-like 3 (Drosophila)                                                          | -1.60 |
| 1422474_at   | NM_001177980 | Pde4b    | phosphodiesterase 4B, cAMP specific                                                            | -1.60 |
| 1456640_at   | NM_001146299 | Sh3rf2   | SH3 domain containing ring finger 2                                                            | -1.60 |
| 1416007_at   | NM_001163630 | Satb1    | special AT-rich sequence binding protein 1                                                     | -1.60 |
| 1440339_at   | NM_008813    | Enpp1    | ectonucleotide pyrophosphatase/phosphodiesterase 1                                             | -1.60 |
| 1455333_at   | NM_001083587 | Tns3     | tensin 3                                                                                       | -1.60 |
| 1452832_s_at | NM_138651    | Cds2     | CDP-diacylglycerol synthase (phosphatidate cytidyltransferase) 2                               | -1.60 |
| 1421917_at   | NM_001083316 | Pdgfra   | platelet derived growth factor receptor, alpha polypeptide                                     | -1.60 |
| 1436650_at   | NM_001081243 | Filip1   | filamin A interacting protein 1                                                                | -1.60 |
| 1419470_at   | NM_013531    | Gnb4     | guanine nucleotide binding protein (G protein), beta 4                                         | -1.60 |
| 1424988_at   | NM_153789    | Myliip   | myosin regulatory light chain interacting protein                                              | -1.60 |
| 1423689_a_at | NM_153410    | Gpsm1    | G-protein signalling modulator 1 (AGS3-like, C. elegans)                                       | -1.60 |
| 1424123_at   | NM_145447    | Mfsd7c   | major facilitator superfamily domain containing 7C                                             | -1.60 |
| 1457139_at   | NM_177047    | Auts2    | autism susceptibility candidate 2                                                              | -1.60 |
| 1417862_at   | NM_021427    | Fam181b  | family with sequence similarity 181, member B                                                  | -1.60 |
| 1429893_at   | NM_134437    | Il17rd   | interleukin 17 receptor D                                                                      | -1.60 |
| 1451427_a_at | NM_001164564 | Egfl7    | EGF-like domain 7                                                                              | -1.60 |
| 1452351_at   | NM_001145978 | Parp4    | poly (ADP-ribose) polymerase family, member 4                                                  | -1.60 |
| 1454685_at   | NM_001038703 | Gpr146   | G protein-coupled receptor 146                                                                 | -1.60 |
| 1436098_at   | NM_009738    | Bche     | butyrylcholinesterase                                                                          | -1.60 |
| 1455741_a_at | NM_199307    | Ece1     | endothelin converting enzyme 1                                                                 | -1.60 |
| 1424208_at   | NM_001136079 | Ptger4   | prostaglandin E receptor 4 (subtype EP4)                                                       | -1.60 |
| 1448409_at   | NM_008511    | Lrmp     | lymphoid-restricted membrane protein                                                           | -1.60 |
| 1422571_at   | NM_011581    | Thbs2    | thrombospondin 2                                                                               | -1.60 |
| 1415975_at   | NM_025821    | Carhsp1  | calcium regulated heat stable protein 1                                                        | -1.60 |
| 1439632_at   | NM_013531    | Gnb4     | guanine nucleotide binding protein (G protein), beta 4                                         | -1.59 |
| 1435133_at   | NM_011673    | Ugcg     | UDP-glucose ceramide glucosyltransferase                                                       | -1.59 |
| 1455145_at   | NM_001105245 | Pcdh19   | protocadherin 19                                                                               | -1.59 |
| 1444734_at   | BB183877     |          | RIKEN cDNA A330001L22 gene                                                                     | -1.59 |
| 1454974_at   | NM_008744    | Ntn1     | netrin 1                                                                                       | -1.59 |
| 1421141_a_at | NM_001197321 | Foxp1    | forkhead box P1                                                                                | -1.59 |
| 1416008_at   | NM_001163630 | Satb1    | special AT-rich sequence binding protein 1                                                     | -1.59 |
| 1421964_at   | NM_008716    | Notch3   | Notch gene homolog 3 (Drosophila)                                                              | -1.59 |
| 1423551_at   | NM_019707    | Cdh13    | cadherin 13                                                                                    | -1.59 |
| 1440849_at   | NM_009027    | Rasgrf2  | RAS protein-specific guanine nucleotide-releasing factor 2                                     | -1.59 |
| 1417676_a_at | NM_001164401 | Ptpro    | protein tyrosine phosphatase, receptor type, O                                                 | -1.59 |
| 1460596_at   | NM_009642    | Agtrap   | angiotensin II, type I receptor-associated protein                                             | -1.59 |
| 1452106_at   | NM_001029836 | Npnt     | nephronectin                                                                                   | -1.59 |
| 1455274_at   | BI076807     | Gm14226  | predicted gene 14226                                                                           | -1.59 |
| 1419572_a_at | NM_008992    | Abcd4    | ATP-binding cassette, sub-family D (ALD), member 4                                             | -1.59 |
| 1436178_at   | NM_173379    | Leprel1  | leprecan-like 1                                                                                | -1.59 |
| 1423753_at   | NM_026505    | Bambi    | BMP and activin membrane-bound inhibitor, homolog (Xenopus laevis)                             | -1.59 |
| 1426100_a_at | NM_021028    | Tk2      | thymidine kinase 2, mitochondrial                                                              | -1.59 |
| 1422697_s_at | NM_021878    | Jarid2   | jumonji, AT rich interactive domain 2                                                          | -1.59 |
| 1419412_at   | NM_008510    | Xcl1     | chemokine (C motif) ligand 1                                                                   | -1.59 |
| 1421824_at   | NM_001145947 | Bace1    | beta-site APP cleaving enzyme 1                                                                | -1.59 |
| 1439604_at   | NM_172053    | Adamts16 | a disintegrin-like and metallopeptidase (reprolysin type) with thrombospondin type 1 motif, 16 | -1.59 |
| 1453173_at   | NM_172398    | Akr1b10  | aldo-keto reductase family 1, member B10 (aldose reductase)                                    | -1.59 |
| 1437874_s_at | NM_010422    | Hexb     | hexosaminidase B                                                                               | -1.59 |
| 1430352_at   | NM_175314    | Adamts9  | a disintegrin-like and metallopeptidase (reprolysin type) with thrombospondin type 1 motif, 9  | -1.59 |

| Probe Set ID | Accession_ID | Gene     | Description                                                                          | Fold  |
|--------------|--------------|----------|--------------------------------------------------------------------------------------|-------|
| 1439847_s_at | NM_010636    | Klf12    | Kruppel-like factor 12                                                               | -1.59 |
| 1434334_at   | NM_178900    | Prkd2    | protein kinase D2                                                                    | -1.59 |
| 1442187_at   | NM_009747    | Bdkrb2   | Bradykinin receptor, beta 2                                                          | -1.58 |
| 1454777_at   | NM_175316    | Slco2b1  | solute carrier organic anion transporter family, member 2b1                          | -1.58 |
| 1417501_at   | NM_001163704 | Fbxo6    | F-box protein 6                                                                      | -1.58 |
| 1424359_at   | NM_153122    | Oplah    | 5-oxoprolinase (ATP-hydrolysing)                                                     | -1.58 |
| 1435436_at   | NM_010137    | Epas1    | endothelial PAS domain protein 1                                                     | -1.58 |
| 1422821_s_at | NM_023377    | Stard5   | StAR-related lipid transfer (START) domain containing 5                              | -1.58 |
| 1452474_a_at | NM_181728    | Art3     | ADP-ribosyltransferase 3                                                             | -1.58 |
| 1452792_at   | NM_025943    | Dzip1    | DAZ interacting protein 1                                                            | -1.58 |
| 1426348_at   | NM_009931    | Col4a1   | collagen, type IV, alpha 1                                                           | -1.58 |
| 1429543_at   | AI553459     |          | RIKEN cDNA 6230424C14 gene                                                           | -1.58 |
| 1459840_s_at | NM_025455    | Ccdc28b  | coiled coil domain containing 28B                                                    | -1.58 |
| 1440116_at   | NM_194061    |          | RIKEN cDNA D630045J12 gene                                                           | -1.58 |
| 1417477_at   | NM_025294    | Gm16515  | predicted gene, Gm16515                                                              | -1.58 |
| 1427943_at   | NM_029344    | Acyp2    | acylphosphatase 2, muscle type                                                       | -1.58 |
| 1454766_at   | NM_001113424 | Amn1     | antagonist of mitotic exit network 1 homolog ( <i>S. cerevisiae</i> )                | -1.58 |
| 1451939_a_at | NM_016911    | Srpx     | sushi-repeat-containing protein                                                      | -1.58 |
| 1421074_at   | NM_007825    | Cyp7b1   | cytochrome P450, family 7, subfamily b, polypeptide 1                                | -1.58 |
| 1416511_a_at | NM_001163346 | Cdc42ep4 | CDC42 effector protein (Rho GTPase binding) 4                                        | -1.58 |
| 1436425_at   | NM_172872    | Kank4    | KN motif and ankyrin repeat domains 4                                                | -1.58 |
| 1415758_at   | NM_028194    | Fryl     | furry homolog-like ( <i>Drosophila</i> )                                             | -1.58 |
| 1423570_at   | NM_009593    | Abcg1    | ATP-binding cassette, sub-family G (WHITE), member 1                                 | -1.58 |
| 1448830_at   | NM_013642    | Dusp1    | dual specificity phosphatase 1                                                       | -1.58 |
| 1438953_at   | NM_010216    | Figf     | c-fos induced growth factor                                                          | -1.58 |
| 1425788_a_at | NM_026728    | Echdc2   | enoyl Coenzyme A hydratase domain containing 2                                       | -1.58 |
| 1423613_at   | NM_080558    | Ssfa2    | sperm specific antigen 2                                                             | -1.58 |
| 1447830_s_at | NM_009061    | Rgs2     | regulator of G-protein signaling 2                                                   | -1.57 |
| 1447849_s_at | NM_001025577 | Maf      | avian musculoaponeurotic fibrosarcoma (v-maf) AS42 oncogene homolog                  | -1.57 |
| 1437401_at   | NM_001111274 | Igf1     | insulin-like growth factor 1                                                         | -1.57 |
| 1451036_at   | NM_138584    | Spg21    | spastic paraplegia 21 homolog (human)                                                | -1.57 |
| 1422903_at   | NM_010745    | Ly86     | lymphocyte antigen 86                                                                | -1.57 |
| 1434735_at   | NM_172563    | Hlf      | hepatic leukemia factor                                                              | -1.57 |
| 1438667_at   | NM_001032727 | Sybu     | syntabulin (syntaxin-interacting)                                                    | -1.57 |
| 1448890_at   | NM_008452    | Klf2     | Kruppel-like factor 2 (lung)                                                         | -1.57 |
| 1428490_at   | NM_052993    | C1galt1  | core 1 synthase, glycoprotein-N-acetylgalactosamine 3-beta-galactosyltransferase, 1  | -1.57 |
| 1418250_at   | NM_025404    | Arl4d    | ADP-ribosylation factor-like 4D                                                      | -1.57 |
| 1416286_at   | NM_009062    | Rgs4     | regulator of G-protein signaling 4                                                   | -1.57 |
| 1437392_at   | NM_001085521 | Tmem90b  | transmembrane protein 90B                                                            | -1.57 |
| 1417464_at   | NM_009394    | Tnnc2    | troponin C2, fast                                                                    | -1.57 |
| 1419874_x_at | NM_001033324 | Zbtb16   | zinc finger and BTB domain containing 16                                             | -1.57 |
| 1435464_at   | NM_133697    |          | RIKEN cDNA 1110003E01 gene                                                           | -1.57 |
| 1434372_at   | NM_001177351 |          | expressed sequence AW112010                                                          | -1.57 |
| 1434470_at   | NM_030725    | Syt13    | synaptotagmin XIII                                                                   | -1.57 |
| 1436294_at   | NM_001190371 | Ankrd29  | ankyrin repeat domain 29                                                             | -1.57 |
| 1435865_at   | NM_031172    |          | histone cluster 3, H2a /// tripartite motif-containing 17                            | -1.57 |
| 1429399_at   | NM_026301    | Rnf125   | ring finger protein 125                                                              | -1.57 |
| 1425267_a_at | NM_001032413 | Pear1    | platelet endothelial aggregation receptor 1                                          | -1.57 |
| 1435867_at   | NM_001033430 | Jhdm1d   | jumonji C domain-containing histone demethylase 1 homolog D ( <i>S. cerevisiae</i> ) | -1.57 |
| 1435714_x_at | NM_145837    | Il17d    | interleukin 17D                                                                      | -1.57 |
| 1454731_at   | NM_019472    | Myo10    | myosin X                                                                             | -1.57 |

| Probe Set ID | Accession_ID | Gene     | Description                                                                   | Fold  |
|--------------|--------------|----------|-------------------------------------------------------------------------------|-------|
| 1423803_s_at | NM_133831    | Gltscr2  | glioma tumor suppressor candidate region gene 2                               | -1.57 |
| 1460197_a_at | NM_054098    | Steap4   | STEAP family member 4                                                         | -1.57 |
| 1441946_at   | NM_172471    | Itih5    | inter-alpha (globulin) inhibitor H5                                           | -1.57 |
| 1439496_at   | NM_029858    | Ston1    | Stonin 1                                                                      | -1.57 |
| 1426539_at   | NM_145628    | Usp11    | ubiquitin specific peptidase 11                                               | -1.57 |
| 1423989_at   | NM_027410    | Tecpr1   | tectonin beta-propeller repeat containing 1                                   | -1.57 |
| 1435467_at   | NM_053072    | Fgd6     | FYVE, RhoGEF and PH domain containing 6                                       | -1.57 |
| 1429400_at   | NM_016691    | Clcn5    | chloride channel 5                                                            | -1.57 |
| 1436325_at   | NM_013646    | Rora     | RAR-related orphan receptor alpha                                             | -1.57 |
| 1416301_a_at | NM_007897    | Ebf1     | early B-cell factor 1                                                         | -1.56 |
| 1423414_at   | NM_008969    | Ptgs1    | prostaglandin-endoperoxide synthase 1                                         | -1.56 |
| 1455342_at   | NM_181348    | Prune2   | prune homolog 2 (Drosophila)                                                  | -1.56 |
| 1426731_at   | NM_010043    | Des      | desmin                                                                        | -1.56 |
| 1453238_s_at | NR_002860    |          | RIKEN cDNA 3930401B19 gene                                                    | -1.56 |
| 1416322_at   | NM_054077    | Prelp    | proline arginine-rich end leucine-rich repeat                                 | -1.56 |
| 1423415_at   | NM_010287    | Gpr83    | G protein-coupled receptor 83                                                 | -1.56 |
| 1424051_at   | NM_009932    | Col4a2   | collagen, type IV, alpha 2                                                    | -1.56 |
| 1424374_at   | NM_174990    | Gimap4   | GTPase, IMAP family member 4                                                  | -1.56 |
| 1455840_at   | NM_175930    | Rapgef5  | Rap guanine nucleotide exchange factor (GEF) 5                                | -1.56 |
| 1439500_at   | NM_027268    | Scrn1    | secernin 1                                                                    | -1.56 |
| 1455031_at   | NM_001168304 | Cdk19    | cyclin-dependent kinase 19                                                    | -1.56 |
| 1434833_at   | NM_009006    | Map4k2   | mitogen-activated protein kinase kinase kinase kinase 2                       | -1.56 |
| 1452667_at   | NM_172601    | Rab2b    | RAB2B, member RAS oncogene family                                             | -1.56 |
| 1454656_at   | NM_001033272 | Spata13  | spermatogenesis associated 13                                                 | -1.56 |
| 1448942_at   | NM_025331    | Gng11    | guanine nucleotide binding protein (G protein), gamma 11                      | -1.56 |
| 1422953_at   | NM_008039    | Fpr2     | formyl peptide receptor 2                                                     | -1.56 |
| 1435363_at   | NM_001033253 | Plekhg1  | pleckstrin homology domain containing, family G (with RhoGef domain) member 1 | -1.56 |
| 1419300_at   | NM_010228    | Flt1     | FMS-like tyrosine kinase 1                                                    | -1.56 |
| 1419093_at   | NM_019911    | Tdo2     | tryptophan 2,3-dioxygenase                                                    | -1.56 |
| 1420913_at   | NM_033314    | Slco2a1  | solute carrier organic anion transporter family, member 2a1                   | -1.56 |
| 1447800_x_at | NM_001130458 | Tcn2     | transcobalamin 2                                                              | -1.56 |
| 1434428_at   | NM_001172216 |          | RIKEN cDNA D330028D13 gene                                                    | -1.56 |
| 1455160_at   | NR_015483    |          | RIKEN cDNA 2610203C20 gene                                                    | -1.56 |
| 1449630_s_at | NM_145515    | Mark1    | MAP/microtubule affinity-regulating kinase 1                                  | -1.56 |
| 1434329_s_at | NM_197985    | Adipor2  | adiponectin receptor 2                                                        | -1.56 |
| 1453141_at   | XR_106377    |          | RIKEN cDNA 0610009L18 gene                                                    | -1.56 |
| 1427923_at   | NM_172700    | Zmpste24 | zinc metallopeptidase, STE24 homolog (S. cerevisiae)                          | -1.56 |
| 1441687_at   | NM_009523    |          | wingless-related MMTV integration site 4                                      | -1.56 |
| 1428955_x_at | NM_023055    | Slc9a3r2 | solute carrier family 9 (sodium/hydrogen exchanger), member 3 regulator 2     | -1.55 |
| 1415850_at   | NM_009025    | Rasa3    | RAS p21 protein activator 3                                                   | -1.55 |
| 1442063_at   | NM_029967    | Adamts1  | ADAMTS-like 1                                                                 | -1.55 |
| 1420630_at   | NM_028982    |          | RIKEN cDNA 8430419L09 gene                                                    | -1.55 |
| 1439854_at   | NM_007545    | Hrk      | harakiri, BCL2 interacting protein (contains only BH3 domain)                 | -1.55 |
| 1422437_at   | NM_007737    | Col5a2   | collagen, type V, alpha 2                                                     | -1.55 |
| 1432198_at   | AK018172     |          |                                                                               | -1.55 |
| 1426245_s_at | NM_001162941 | Mapre2   | microtubule-associated protein, RP/EB family, member 2                        | -1.55 |
| 1426083_a_at | NM_007569    | Btg1     | B-cell translocation gene 1, anti-proliferative                               | -1.55 |
| 1428861_at   | NM_001040397 | Filip1l  | filamin A interacting protein 1-like                                          | -1.55 |
| 1425407_s_at | NM_001170332 |          | C-type lectin domain family 4, member a2                                      | -1.55 |
| 1450380_at   | NM_134065    | Epdr1    | ependymin related protein 1 (zebrafish)                                       | -1.55 |
| 1452398_at   | NM_019588    | Plce1    | phospholipase C, epsilon 1                                                    | -1.55 |
| 1426313_at   | NM_144541    | Bre      | brain and reproductive organ-expressed protein                                | -1.55 |

| Probe Set ID | Accession_ID | Gene      | Description                                                                                                              | Fold  |
|--------------|--------------|-----------|--------------------------------------------------------------------------------------------------------------------------|-------|
| 1419488_at   | NM_139064    | Tnip2     | TNFAIP3 interacting protein 2                                                                                            | -1.55 |
| 1434571_at   | NM_177151    | Vps13b    | vacuolar protein sorting 13B (yeast)                                                                                     | -1.55 |
| 1416410_at   | NM_008776    | Pafah1b3  | platelet-activating factor acetylhydrolase, isoform 1b, subunit 3                                                        | -1.55 |
| 1435275_at   | NM_183405    | Cox6b2    | cytochrome c oxidase subunit VIb polypeptide 2                                                                           | -1.55 |
| 1418547_at   | NM_009364    | Tfpi2     | tissue factor pathway inhibitor 2                                                                                        | -1.55 |
| 1416658_at   | NM_011356    | Frzb      | frizzled-related protein                                                                                                 | -1.55 |
| 1427313_at   | NM_008967    | Ptgir     | prostaglandin I receptor (IP)                                                                                            | -1.55 |
| 1448613_at   | NM_007899    | Ecm1      | extracellular matrix protein 1                                                                                           | -1.55 |
| 1455080_at   | NM_001159662 | Ppp1r16b  | protein phosphatase 1, regulatory (inhibitor) subunit 16B                                                                | -1.55 |
| 1415929_at   | NM_026160    | Map1lc3b  | microtubule-associated protein 1 light chain 3 beta                                                                      | -1.55 |
| 1454803_a_at | NM_144919    | Hdac11    | histone deacetylase 11                                                                                                   | -1.55 |
| 1448902_at   | NM_001168475 | Ttc23     | tetratricopeptide repeat domain 23                                                                                       | -1.55 |
| 1456835_at   | BB437157     |           |                                                                                                                          | -1.55 |
| 1418453_a_at | NM_009721    | Atp1b1    | ATPase, Na <sup>+</sup> /K <sup>+</sup> transporting, beta 1 polypeptide                                                 | -1.55 |
| 1437886_at   | NM_183390    | Klhl6     | kelch-like 6 (Drosophila)                                                                                                | -1.55 |
| 1425746_at   | NM_030021    |           | RIKEN cDNA D730039F16 gene                                                                                               | -1.55 |
| 1426454_at   | NM_007486    | Arhgdib   | Rho, GDP dissociation inhibitor (GDI) beta                                                                               | -1.55 |
| 1417649_at   | NM_001161624 | Cdkn1c    | cyclin-dependent kinase inhibitor 1C (P57)                                                                               | -1.55 |
| 1439087_a_at | NM_178149    | Pik3ip1   | phosphoinositide-3-kinase interacting protein 1                                                                          | -1.55 |
| 1428288_at   | NM_010638    | Klf9      | Kruppel-like factor 9                                                                                                    | -1.55 |
| 1439036_a_at | NM_009721    | Atp1b1    | ATPase, Na <sup>+</sup> /K <sup>+</sup> transporting, beta 1 polypeptide                                                 | -1.54 |
| 1418050_at   | NM_008156    | Gpld1     | glycosylphosphatidylinositol specific phospholipase D1                                                                   | -1.54 |
| 1455044_at   | NM_172614    | Tmem44    | transmembrane protein 44                                                                                                 | -1.54 |
| 1427885_at   | NM_027196    | Pold4     | polymerase (DNA-directed), delta 4                                                                                       | -1.54 |
| 1460235_at   | NM_007644    | Scarb2    | scavenger receptor class B, member 2                                                                                     | -1.54 |
| 1434314_s_at | NM_001003955 | Rab11fip5 | RAB11 family interacting protein 5 (class I)                                                                             | -1.54 |
| 1436033_at   | NM_001113283 |           | cDNA sequence BC031353                                                                                                   | -1.54 |
| 1417963_at   | NM_011125    | Pltp      | phospholipid transfer protein                                                                                            | -1.54 |
| 1451738_at   | NM_139144    | Ogt       | O-linked N-acetylglucosamine (GlcNAc) transferase (UDP-N-acetylglucosamine:polypeptide-N-acetylglucosaminyl transferase) | -1.54 |
| 1426246_at   | NM_011173    | Pros1     | protein S (alpha)                                                                                                        | -1.54 |
| 1438685_at   | NM_001099319 |           | predicted gene 12942 /// zinc finger, MYM-type 6                                                                         | -1.54 |
| 1418366_at   | NM_013549    |           | histone cluster 2, H2aa1                                                                                                 | -1.54 |
| 1416592_at   | NM_053108    | Glrx      | glutaredoxin                                                                                                             | -1.54 |
| 1437111_at   | NM_001162921 | Zc3h12c   | zinc finger CCCH type containing 12C                                                                                     | -1.54 |
| 1428259_at   | NM_181395    | Pxdn      | peroxidase homolog (Drosophila)                                                                                          | -1.54 |
| 1428026_at   | NM_080455    | Tshz2     | teashirt zinc finger family member 2                                                                                     | -1.54 |
| 1454704_at   | NM_007644    | Scarb2    | scavenger receptor class B, member 2                                                                                     | -1.54 |
| 1448649_at   | NM_007934    | Enpep     | glutamyl aminopeptidase                                                                                                  | -1.54 |
| 1452072_at   | NM_026793    | Myct1     | myc target 1                                                                                                             | -1.54 |
| 1448146_at   | NM_025830    | Wwp2      | WW domain containing E3 ubiquitin protein ligase 2                                                                       | -1.54 |
| 1425826_a_at | NM_001034962 | Sorbs1    | sorbin and SH3 domain containing 1                                                                                       | -1.54 |
| 1449991_at   | NM_018729    | Cd244     | CD244 natural killer cell receptor 2B4                                                                                   | -1.54 |
| 1450495_a_at | NM_001083322 | Klrk1     | killer cell lectin-like receptor subfamily K, member 1                                                                   | -1.54 |
| 1416474_at   | NM_020043    | Igdcc4    | immunoglobulin superfamily, DCC subclass, member 4                                                                       | -1.54 |
| 1454757_s_at | NM_026790    | Ifi271l   | interferon, alpha-inducible protein 27 like 1                                                                            | -1.54 |
| 1418367_x_at | NM_013549    |           | histone cluster 2, H2aa1 /// histone cluster 2, H2aa2 /// histone cluster 2, H2ac /// histone cluster 2, H3c1            | -1.54 |
| 1418862_at   | NM_024208    | Echdc3    | enoyl Coenzyme A hydratase domain containing 3                                                                           | -1.54 |
| 1431645_a_at | NM_008112    | Gdi2      | guanosine diphosphate (GDP) dissociation inhibitor 2                                                                     | -1.54 |
| 1435933_at   | NM_001099298 | Scn2a1    | sodium channel, voltage-gated, type II, alpha 1                                                                          | -1.54 |
| 1421207_at   | NM_001039537 | Lif       | leukemia inhibitory factor                                                                                               | -1.54 |
| 1423652_at   | NM_026921    | Isca1     | iron-sulfur cluster assembly 1 homolog (S. cerevisiae)                                                                   | -1.54 |

| Probe Set ID | Accession_ID | Gene      | Description                                                                 | Fold  |
|--------------|--------------|-----------|-----------------------------------------------------------------------------|-------|
| 1429726_at   | NM_025807    | Slc16a9   | solute carrier family 16 (monocarboxylic acid transporters), member 9       | -1.54 |
| 1448655_at   | NM_008512    | Lrp1      | low density lipoprotein receptor-related protein 1                          | -1.54 |
| 1448775_at   | NM_001045481 | Ifi203    | interferon activated gene 203                                               | -1.54 |
| 1419186_a_at | NM_001159745 | St8sia4   | ST8 alpha-N-acetyl-neuraminide alpha-2,8-sialyltransferase 4                | -1.54 |
| 1424354_at   | NM_197986    | Tmem140   | transmembrane protein 140                                                   | -1.54 |
| 1419469_at   | NM_013531    | Gnb4      | guanine nucleotide binding protein (G protein), beta 4                      | -1.54 |
| 1448276_at   | NM_053082    | Tspan4    | tetraspanin 4                                                               | -1.54 |
| 1429310_at   | NM_001172160 | Flrt3     | fibronectin leucine rich transmembrane protein 3                            | -1.53 |
| 1429909_at   | NM_001083810 | Prr5l     | proline rich 5 like                                                         | -1.53 |
| 1448272_at   | NM_007570    | Btg2      | B-cell translocation gene 2, anti-proliferative                             | -1.53 |
| 1428115_a_at | NM_172601    | Rab2b     | RAB2B, member RAS oncogene family                                           | -1.53 |
| 1421142_s_at | NM_001197321 | Foxp1     | forkhead box P1                                                             | -1.53 |
| 1456609_at   | NM_025451    | Camk2n1   | calcium/calmodulin-dependent protein kinase II inhibitor 1                  | -1.53 |
| 1417304_at   | NM_009893    | Chrd      | chordin                                                                     | -1.53 |
| 1449147_at   | NM_023850    | Chst1     | carbohydrate (keratan sulfate Gal-6) sulfotransferase 1                     | -1.53 |
| 1416418_at   | NM_020590    | Gabarapl1 | gamma-aminobutyric acid (GABA) A receptor-associated protein-like 1         | -1.53 |
| 1415877_at   | NM_001136086 | Dpysl3    | dihydropyrimidinase-like 3                                                  | -1.53 |
| 1415958_at   | NM_009204    | Slc2a4    | solute carrier family 2 (facilitated glucose transporter), member 4         | -1.53 |
| 1449082_at   | NM_015776    | Mfap5     | microfibrillar associated protein 5                                         | -1.53 |
| 1423141_at   | NM_001111100 | Lipa      | lysosomal acid lipase A                                                     | -1.53 |
| 1456150_at   | NM_001033430 | Jhdm1d    | jumonji C domain-containing histone demethylase 1 homolog D (S. cerevisiae) | -1.53 |
| 1423986_a_at | NM_025858    | Shisa5    | shisa homolog 5 (Xenopus laevis)                                            | -1.53 |
| 1418746_at   | NM_001039509 | Pnkd      | paroxysmal nonkinesigenic dyskinesia                                        | -1.53 |
| 1423690_s_at | NM_153410    | Gpsm1     | G-protein signalling modulator 1 (AGS3-like, C. elegans)                    | -1.53 |
| 1435740_at   | NM_183208    |           | predicted gene 10397 /// zinc finger, MIZ-type containing 1                 | -1.53 |
| 1460178_at   | NM_001168591 | Lonp2     | lon peptidase 2, peroxisomal                                                | -1.53 |
| 1418090_at   | NM_032398    | Plvap     | plasmalemma vesicle associated protein                                      | -1.53 |
| 1417283_at   | NM_011838    | Lynx1     | Ly6/neurotoxin 1                                                            | -1.53 |
| 1416695_at   | NM_009775    | Tspo      | translocator protein                                                        | -1.53 |
| 1427894_at   | NM_139307    | Vasn      | vasorin                                                                     | -1.53 |
| 1451099_at   | NM_011843    | Esyt1     | extended synaptotagmin-like protein 1                                       | -1.53 |
| 1460003_at   | AV234963     |           | expressed sequence AI956758                                                 | -1.53 |
| 1418484_at   | NM_011902    | Tekt2     | tektin 2                                                                    | -1.53 |
| 1455558_at   | NM_001033298 | Plk1s1    | polo-like kinase 1 substrate 1                                              | -1.53 |
| 1422788_at   | NM_021398    | Slc43a3   | solute carrier family 43, member 3                                          | -1.53 |
| 1430012_at   | AK004221     |           | RIKEN cDNA 1110050K14 gene                                                  | -1.53 |
| 1433795_at   | NM_011578    | Tgfr3     | transforming growth factor, beta receptor III                               | -1.53 |
| 1448228_at   | NM_010728    | Lox       | lysyl oxidase                                                               | -1.53 |
| 1417440_at   | NM_001080819 | Arid1a    | AT rich interactive domain 1A (SWI-like)                                    | -1.53 |
| 1446075_at   | AV376107     |           |                                                                             | -1.53 |
| 1434930_at   | NM_145853    | Tpcn1     | two pore channel 1                                                          | -1.52 |
| 1417522_at   | NM_026346    | Fbxo32    | F-box protein 32                                                            | -1.52 |
| 1449401_at   | NM_007574    | C1qc      | complement component 1, q subcomponent, C chain                             | -1.52 |
| 1439994_at   | NM_001145433 |           | RIKEN cDNA 1810013D10 gene                                                  | -1.52 |
| 1448499_a_at | NM_007940    | Ephx2     | epoxide hydrolase 2, cytoplasmic                                            | -1.52 |
| 1450080_at   | NM_028375    | Cxx1c     | CAAX box 1 homolog C (human)                                                | -1.52 |
| 1419994_s_at | NM_025514    | Anapc16   | anaphase promoting complex subunit 16                                       | -1.52 |
| 1422514_at   | NM_009636    | Aebp1     | AE binding protein 1                                                        | -1.52 |
| 1424268_at   | NM_001177833 | Smox      | spermine oxidase                                                            | -1.52 |
| 1435222_at   | NM_001197321 | Foxp1     | forkhead box P1                                                             | -1.52 |

| Probe Set ID | Accession_ID | Gene      | Description                                                                                | Fold  |
|--------------|--------------|-----------|--------------------------------------------------------------------------------------------|-------|
| 1446625_at   | NM_026433    | Tmem100   | transmembrane protein 100                                                                  | -1.52 |
| 1422155_at   | NM_054045    |           | histone cluster 2, H3c2, pseudogene                                                        | -1.52 |
| 1443458_at   | XM_001001707 |           | RIKEN cDNA D630033O11 gene                                                                 | -1.52 |
| 1453011_at   | NM_001172055 | Bdh2      | 3-hydroxybutyrate dehydrogenase, type 2                                                    | -1.52 |
| 1434068_s_at | NR_015519    | AI662270  | expressed sequence AI662270                                                                | -1.52 |
| 1421073_a_at | NM_001136079 | Ptger4    | prostaglandin E receptor 4 (subtype EP4)                                                   | -1.52 |
| 1417179_at   | NM_019571    | Tspan5    | tetraspanin 5                                                                              | -1.52 |
| 1418641_at   | NM_010696    | Lcp2      | lymphocyte cytosolic protein 2                                                             | -1.52 |
| 1424653_at   | NM_197996    | Tspan15   | tetraspanin 15                                                                             | -1.52 |
| 1424421_at   | NM_177041    | Flad1     | RFad1, flavin adenine dinucleotide synthetase, homolog (yeast)                             | -1.52 |
| 1449319_at   | NM_138683    | Rspo1     | R-spondin homolog (Xenopus laevis)                                                         | -1.52 |
| 1445546_at   | AI844685     | AI844685  | expressed sequence AI844685                                                                | -1.52 |
| 1417089_a_at | NM_009897    | Ckmt1     | creatine kinase, mitochondrial 1, ubiquitous                                               | -1.52 |
| 1416419_s_at | NM_020590    | Gabarapl1 | gamma-aminobutyric acid (GABA) A receptor-associated protein-like 1                        | -1.52 |
| 1425779_a_at | NM_011532    | Tbx1      | T-box 1                                                                                    | -1.52 |
| 1423439_at   | NM_011044    | Pck1      | phosphoenolpyruvate carboxykinase 1, cytosolic                                             | -1.52 |
| 1448254_at   | NM_008973    | Ptn       | pleiotrophin                                                                               | -1.52 |
| 1419062_at   | NM_013813    | Epb4.1l3  | erythrocyte protein band 4.1-like 3                                                        | -1.52 |
| 1434315_at   | NM_028995    | Nipal3    | NIPA-like domain containing 3                                                              | -1.51 |
| 1420277_at   | AV245881     |           |                                                                                            | -1.51 |
| 1452714_at   | NM_198294    | Tanc1     | tetratricopeptide repeat, ankyrin repeat and coiled-coil containing 1                      | -1.51 |
| 1435092_at   | NM_001039515 | Arl4a     | ADP-ribosylation factor-like 4A                                                            | -1.51 |
| 1458299_s_at | NM_008690    | Nfkbie    | nuclear factor of kappa light polypeptide gene enhancer in B-cells inhibitor, epsilon      | -1.51 |
| 1435763_at   | NM_172443    | Tbc1d16   | TBC1 domain family, member 16                                                              | -1.51 |
| 1444384_at   | BB364291     | ---       |                                                                                            | -1.51 |
| 1428267_at   | NM_026191    | Dhx40     | DEAH (Asp-Glu-Ala-His) box polypeptide 40                                                  | -1.51 |
| 1416968_a_at | NM_001040684 | Hsd3b7    | hydroxy-delta-5-steroid dehydrogenase, 3 beta- and steroid delta-isomerase 7               | -1.51 |
| 1421140_a_at | NM_001197321 | Foxp1     | forkhead box P1                                                                            | -1.51 |
| 1455515_at   | NM_001163145 |           | RIKEN cDNA 1810041L15 gene                                                                 | -1.51 |
| 1426752_at   | NM_001130184 | Phf17     | PHD finger protein 17                                                                      | -1.51 |
| 1429001_at   | NM_027153    | Pir       | pirin                                                                                      | -1.51 |
| 1449127_at   | NM_009151    | Selplg    | selectin, platelet (p-selectin) ligand                                                     | -1.51 |
| 1418939_at   | NM_008250    | Hlx       | H2.0-like homeobox                                                                         | -1.51 |
| 1423413_at   | NM_008681    | Ndrp1     | N-myc downstream regulated gene 1                                                          | -1.51 |
| 1457701_at   | NM_001034863 | Tmem136   | transmembrane protein 136                                                                  | -1.51 |
| 1417271_a_at | NM_001146348 | Eng       | endoglin                                                                                   | -1.51 |
| 1456480_at   | NM_172887    | Fry       | furry homolog (Drosophila)                                                                 | -1.51 |
| 1421594_a_at | NM_001040085 | Syt12     | synaptotagmin-like 2                                                                       | -1.51 |
| 1460295_s_at | NM_010560    | Il6st     | interleukin 6 signal transducer                                                            | -1.51 |
| 1421313_s_at | NM_007803    | Ctnn      | cortactin                                                                                  | -1.51 |
| 1458426_at   | BM941075     |           |                                                                                            | -1.51 |
| 1438577_at   | BB376947     |           |                                                                                            | -1.51 |
| 1435141_at   | NM_145512    | Sft2d2    | SFT2 domain containing 2                                                                   | -1.51 |
| 1451318_a_at | NM_001111096 | Lyn       | Yamaguchi sarcoma viral (v-src) oncogene homolog                                           | -1.51 |
| 1429273_at   | NM_028472    | Bmper     | BMP-binding endothelial regulator                                                          | -1.51 |
| 1442640_at   | BB530448     |           |                                                                                            | -1.51 |
| 1417251_at   | NM_023245    | Palmd     | palmdelphin                                                                                | -1.51 |
| 1447929_at   | NM_198113    | Ssh3      | slingshot homolog 3 (Drosophila)                                                           | -1.51 |
| 1458308_at   | NM_183426    | Sbno2     | strawberry notch homolog 2 (Drosophila)                                                    | -1.51 |
| 1424762_at   | NM_001040631 |           | C1q and tumor necrosis factor related protein 5 /// membrane-type frizzled-related protein | -1.50 |

| Probe Set ID | Accession_ID | Gene     | Description                                                                                   | Fold  |
|--------------|--------------|----------|-----------------------------------------------------------------------------------------------|-------|
| 1419247_at   | NM_009061    | Rgs2     | regulator of G-protein signaling 2                                                            | -1.50 |
| 1449851_at   | NM_001159367 | Per1     | period homolog 1 (Drosophila)                                                                 | -1.50 |
| 1427200_at   | NM_207302    | Zranb1   | zinc finger, RAN-binding domain containing 1                                                  | -1.50 |
| 1460553_at   | NM_183254    |          | RIKEN cDNA 1700025K23 gene                                                                    | -1.50 |
| 1449049_at   | NM_030682    | Tlr1     | toll-like receptor 1                                                                          | -1.50 |
| 1460437_at   | NM_028195    | Cyth4    | cytohesin 4                                                                                   | -1.50 |
| 1443579_s_at | NM_001037937 |          | DEP domain containing 6 /// hypothetical LOC100505173                                         | -1.50 |
| 1427232_at   | NM_001081300 | Tshz1    | teashirt zinc finger family member 1                                                          | -1.50 |
| 1440825_s_at | NM_144820    | Ccdc28a  | coiled-coil domain containing 28A                                                             | -1.50 |
| 1438402_at   | NM_001081161 | Fam171a1 | family with sequence similarity 171, member A1                                                | -1.50 |
| 1418704_at   | NM_009113    | S100a13  | S100 calcium binding protein A13                                                              | -1.50 |
| 1419467_at   | NM_025809    | Clec14a  | C-type lectin domain family 14, member a                                                      | -1.50 |
| 1419075_s_at | NM_009117    | Saa1     | serum amyloid A 1                                                                             | -1.50 |
| 1417391_a_at | NM_010551    | Il16     | interleukin 16                                                                                | -1.50 |
| 1416613_at   | NM_009994    | Cyp1b1   | cytochrome P450, family 1, subfamily b, polypeptide 1                                         | -1.50 |
| 1427167_at   | XM_003086849 |          | armadillo repeat containing, X-linked 4                                                       | -1.50 |
| 1457266_at   | NM_001037717 | Slc38a6  | solute carrier family 38, member 6                                                            | -1.50 |
| 1419202_at   | NM_009977    | Cst7     | cystatin F (leukocystatin)                                                                    | -1.50 |
| 1416998_at   | NM_021511    | Rrs1     | RRS1 ribosome biogenesis regulator homolog (S. cerevisiae)                                    | 1.50  |
| 1456516_x_at | NM_133806    |          | UDP-N-acetylhexosamine pyrophosphorylase-like /// UDP-N-acetylglucosamine pyrophosphorylase 1 | 1.50  |
| 1427408_a_at | NM_146153    | Thrap3   | thyroid hormone receptor associated protein 3                                                 | 1.50  |
| 1424921_at   | NM_198095    | Bst2     | bone marrow stromal cell antigen 2                                                            | 1.50  |
| 1450914_at   | NM_008889    | Ppp1r14b | protein phosphatase 1, regulatory (inhibitor) subunit 14B                                     | 1.50  |
| 1416030_a_at | NM_008568    | Mcm7     | minichromosome maintenance deficient 7 (S. cerevisiae)                                        | 1.50  |
| 1449265_at   | NM_009807    | Casp1    | caspase 1                                                                                     | 1.50  |
| 1433713_at   | NM_172719    | Gcn111   | GCN1 general control of amino-acid synthesis 1-like 1 (yeast)                                 | 1.50  |
| 1434424_at   | NM_001081259 | Mfsd7b   | major facilitator superfamily domain containing 7B                                            | 1.50  |
| 1428100_at   | NM_001078167 | Srsf1    | serine/arginine-rich splicing factor 1                                                        | 1.50  |
| 1452788_at   | NM_012024    | Ppp2r5e  | protein phosphatase 2, regulatory subunit B (B56), epsilon isoform                            | 1.50  |
| 1438305_at   | NM_001012623 | Rims1    | regulating synaptic membrane exocytosis 1                                                     | 1.50  |
| 1437457_a_at | NM_008098    | Mtpn     | myotrophin                                                                                    | 1.50  |
| 1418727_at   | NM_133227    | Nup155   | nucleoporin 155                                                                               | 1.50  |
| 1429029_at   | NM_028943    | Sgms2    | sphingomyelin synthase 2                                                                      | 1.50  |
| 1449186_at   | NM_026121    | Bag4     | BCL2-associated athanogene 4                                                                  | 1.50  |
| 1426609_at   | NM_028315    | Dis3     | DIS3 mitotic control homolog (S. cerevisiae)                                                  | 1.50  |
| 1422677_at   | NM_026384    | Dgat2    | diacylglycerol O-acyltransferase 2                                                            | 1.50  |
| 1426621_a_at | NM_027531    | Ppp2r2b  | protein phosphatase 2 (formerly 2A), regulatory subunit B (PR 52), beta isoform               | 1.50  |
| 1448373_at   | NM_026310    | Mrpl18   | mitochondrial ribosomal protein L18                                                           | 1.50  |
| 1459756_at   | NM_153585    | Cnot10   | CCR4-NOT transcription complex, subunit 10                                                    | 1.50  |
| 1451166_a_at | NM_029339    | Ccdc101  | coiled-coil domain containing 101                                                             | 1.50  |
| 1439464_s_at | NM_172304    | Tex10    | testis expressed gene 10                                                                      | 1.50  |
| 1452830_s_at | NM_023525    | Cad      | carbamoyl-phosphate synthetase 2, aspartate transcarbamylase, and dihydroorotase              | 1.51  |
| 1457915_at   | NM_177101    |          | RIKEN cDNA 4833442J19 gene                                                                    | 1.51  |
| 1418791_at   | NM_019535    | Sh3gl2   | SH3-domain GRB2-like 2                                                                        | 1.51  |
| 1439553_s_at | NM_026532    |          | nuclear transport factor 2                                                                    | 1.51  |
| 1440870_at   | NM_001177995 | Prdm16   | PR domain containing 16                                                                       | 1.51  |
| 1452787_a_at | NM_019830    | Prmt1    | protein arginine N-methyltransferase 1                                                        | 1.51  |
| 1451363_a_at | NM_001093754 | Dennd2d  | DENN/MADD domain containing 2D                                                                | 1.51  |
| 1430536_a_at | NM_007951    | Erh      | enhancer of rudimentary homolog (Drosophila)                                                  | 1.51  |
| 1435054_at   | NM_177752    | Eme1     | essential meiotic endonuclease 1 homolog 1 (S. pombe)                                         | 1.51  |



| Probe Set ID | Accession_ID | Gene     | Description                                                                               | Fold |
|--------------|--------------|----------|-------------------------------------------------------------------------------------------|------|
| 1423696_a_at | NM_025550    | Psm6     | proteasome (prosome, macropain) 26S subunit, non-ATPase, 6                                | 1.51 |
| 1448113_at   | NM_019641    | Stmn1    | stathmin 1                                                                                | 1.51 |
| 1426853_at   | NM_023871    | Set      | SET nuclear oncogene                                                                      | 1.51 |
| 1438736_at   | NM_001033422 | Thoc2    | THO complex 2                                                                             | 1.51 |
| 1420892_at   | NM_001163633 | Wnt7b    | wingless-related MMTV integration site 7B                                                 | 1.51 |
| 1454831_at   | NM_180974    | Foxn2    | forkhead box N2                                                                           | 1.51 |
| 1429537_at   | NM_025669    | Sfrs18   | serine/arginine-rich splicing factor 18                                                   | 1.51 |
| 1450012_x_at | NM_018871    | Ywhag    | tyrosine 3-monooxygenase/tryptophan 5-monooxygenase activation protein, gamma polypeptide | 1.51 |
| 1425521_at   | NM_001079849 | Paip1    | polyadenylate binding protein-interacting protein 1                                       | 1.51 |
| 1450993_at   | NM_080850    | Pask     | PAS domain containing serine/threonine kinase                                             | 1.51 |
| 1424083_at   | NM_144904    | Rod1     | ROD1 regulator of differentiation 1 (S. pombe)                                            | 1.51 |
| 1451092_a_at | NM_001146174 | Rangap1  | RAN GTPase activating protein 1                                                           | 1.51 |
| 1452168_x_at | NM_001130008 | Gspt1    | G1 to S phase transition 1                                                                | 1.51 |
| 1416746_at   | NM_010436    | H2afx    | H2A histone family, member X                                                              | 1.51 |
| 1460713_at   | NM_207161    | BC048355 | cDNA sequence BC048355                                                                    | 1.51 |
| 1436775_a_at | NM_030886    | Ankrd17  | ankyrin repeat domain 17                                                                  | 1.51 |
| 1450847_at   | NM_026554    | Ncbp2    | nuclear cap binding protein subunit 2                                                     | 1.51 |
| 1443161_at   | BM240648     |          |                                                                                           | 1.51 |
| 1422463_a_at | NM_053159    | Mrpl3    | mitochondrial ribosomal protein L3                                                        | 1.51 |
| 1424323_at   | NM_021303    | Noc2l    | nucleolar complex associated 2 homolog (S. cerevisiae)                                    | 1.51 |
| 1419288_at   | NM_023844    | Jam2     | junction adhesion molecule 2                                                              | 1.51 |
| 1417724_at   | NM_011568    | Thoc4    | THO complex 4                                                                             | 1.51 |
| 1416120_at   | NM_009104    | Rrm2     | ribonucleotide reductase M2                                                               | 1.51 |
| 1416773_at   | NM_009516    | Wee1     | WEE 1 homolog 1 (S. pombe)                                                                | 1.51 |
| 1417511_at   | NM_025281    | Lyar     | Ly1 antibody reactive clone                                                               | 1.51 |
| 1455674_at   | NM_030234    | Wdr76    | WD repeat domain 76                                                                       | 1.51 |
| 1429326_at   | NM_001159930 | Cenpl    | centromere protein L                                                                      | 1.51 |
| 1423852_at   | NM_145463    | Shisa2   | shisa homolog 2 (Xenopus laevis)                                                          | 1.51 |
| 1431829_a_at | NM_023622    | Rgl3     | ral guanine nucleotide dissociation stimulator-like 3                                     | 1.51 |
| 1433718_a_at | NM_007622    | Cbx1     | chromobox homolog 1 (Drosophila HP1 beta)                                                 | 1.52 |
| 1460325_at   | NM_001159603 | Pum1     | pumilio 1 (Drosophila)                                                                    | 1.52 |
| 1448638_at   | NM_001168250 | Mtbp     | Mdm2, transformed 3T3 cell double minute p53 binding protein                              | 1.52 |
| 1453849_s_at | NM_001048061 | Hnrnpab  | heterogeneous nuclear ribonucleoprotein A/B                                               | 1.52 |
| 1422834_at   | NM_019697    | Kcnd2    | potassium voltage-gated channel, Shal-related family, member 2                            | 1.52 |
| 1450188_s_at | NM_010720    | Lipg     | lipase, endothelial                                                                       | 1.52 |
| 1439535_at   | BB204161     |          |                                                                                           | 1.52 |
| 1439394_x_at | NM_023223    | Cdc20    | cell division cycle 20 homolog (S. cerevisiae)                                            | 1.52 |
| 1455841_s_at | NM_153419    | Grwd1    | glutamate-rich WD repeat containing 1                                                     | 1.52 |
| 1425104_at   | NM_001142731 | Kctd1    | potassium channel tetramerisation domain containing 1                                     | 1.52 |
| 1417213_a_at | NM_011251    | Rbm6     | RNA binding motif protein 6                                                               | 1.52 |
| 1450569_a_at | NM_019869    | Rbm14    | RNA binding motif protein 14                                                              | 1.52 |
| 1448536_at   | NM_026309    | Lsm3     | LSM3 homolog, U6 small nuclear RNA associated (S. cerevisiae)                             | 1.52 |
| 1435753_a_at | NM_001145804 | Nucks1   | nuclear casein kinase and cyclin-dependent kinase substrate 1                             | 1.52 |
| 1416423_x_at | NM_001110145 | Ssb      | Sjogren syndrome antigen B                                                                | 1.52 |
| 1420416_at   | NM_009152    | Sema3a   | sema domain, immunoglobulin domain (Ig), short basic domain, secreted, (semaphorin) 3A    | 1.52 |
| 1435693_at   | NM_145532    | Mall     | mal, T-cell differentiation protein-like                                                  | 1.52 |
| 1448604_at   | NM_030724    | Uck2     | uridine-cytidine kinase 2                                                                 | 1.52 |
| 1419034_at   | NM_007788    | Csnk2a1  | casein kinase 2, alpha 1 polypeptide                                                      | 1.52 |
| 1434530_at   | NM_011858    | Odz4     | odd Oz/ten-m homolog 4 (Drosophila)                                                       | 1.52 |
| 1439387_x_at | NM_153775    | Ctu2     | cytosolic thiouridylase subunit 2 homolog (S. pombe)                                      | 1.52 |
| 1423700_at   | NM_027009    | Rfc3     | replication factor C (activator 1) 3                                                      | 1.52 |
| 1425895_a_at | NM_010495    | Id1      | inhibitor of DNA binding 1                                                                | 1.52 |

| Probe Set ID | Accession_ID | Gene          | Description                                                                                 | Fold |
|--------------|--------------|---------------|---------------------------------------------------------------------------------------------|------|
| 1437992_x_at | NM_010288    | Gja1          | gap junction protein, alpha 1                                                               | 1.52 |
| 1437279_x_at | NM_011519    | Sdc1          | syndecan 1                                                                                  | 1.52 |
| 1431692_a_at | NM_001161844 | Cblc          | Casitas B-lineage lymphoma c                                                                | 1.52 |
| 1435184_at   | NM_001039181 | Npr3          | natriuretic peptide receptor 3                                                              | 1.52 |
| 1420720_at   | NM_016789    | Nptx2         | neuronal pentraxin 2                                                                        | 1.52 |
| 1437278_a_at | NM_016682    | Uba2          | ubiquitin-like modifier activating enzyme 2                                                 | 1.52 |
| 1452972_at   | NM_029321    | Ttc32         | tetratricopeptide repeat domain 32                                                          | 1.52 |
| 1433599_at   | NM_013815    | Baz1a         | bromodomain adjacent to zinc finger domain 1A                                               | 1.52 |
| 1429558_a_at | NM_138593    | Larp7         | La ribonucleoprotein domain family, member 7                                                | 1.52 |
| 1415888_at   | NM_008231    | Hdgf          | hepatoma-derived growth factor                                                              | 1.52 |
| 1460687_at   | NM_030241    | Setd8         | SET domain containing (lysine methyltransferase) 8                                          | 1.52 |
| 1455831_at   | NM_139149    | Fus           | fusion, derived from t(12;16) malignant liposarcoma (human)                                 | 1.52 |
| 1416569_at   | NM_019673    | Actl6a        | actin-like 6A                                                                               | 1.52 |
| 1434367_s_at | NM_026532    |               | nuclear transport factor 2 /// nuclear transport factor 2, pseudogene 1                     | 1.52 |
| 1452364_at   | NM_001163018 | Suz12         | suppressor of zeste 12 homolog (Drosophila)                                                 | 1.52 |
| 1437489_x_at | NM_025848    | Sdhb          | succinate dehydrogenase complex, subunit D, integral membrane protein                       | 1.52 |
| 1447363_s_at | NM_009773    | Bub1b         | budding uninhibited by benzimidazoles 1 homolog, beta (S. cerevisiae)                       | 1.52 |
| 1435544_at   | NM_028274    |               | alanyl-tRNA synthetase /// exosome component 6                                              | 1.52 |
| 1429100_at   | NM_001162903 | 2010109K11Rik | RIKEN cDNA 2010109K11 gene                                                                  | 1.52 |
| 1454158_at   | NM_001081287 | Mpp7          | membrane protein, palmitoylated 7 (MAGUK p55 subfamily member 7)                            | 1.52 |
| 1418573_a_at | NM_001139511 | Raly          | hnRNP-associated with lethal yellow                                                         | 1.52 |
| 1422941_at   | NM_053116    | Wnt16         | wingless-related MMTV integration site 16                                                   | 1.52 |
| 1455016_at   | NM_025845    | Prpf38b       | PRP38 pre-mRNA processing factor 38 (yeast) domain containing B                             | 1.52 |
| 1436887_x_at | NM_153419    | Grwd1         | glutamate-rich WD repeat containing 1                                                       | 1.52 |
| 1428870_at   | NM_001039351 | Nolc1         | nucleolar and coiled-body phosphoprotein 1                                                  | 1.53 |
| 1418230_a_at | NM_001193303 | Lims1         | LIM and senescent cell antigen-like domains 1                                               | 1.53 |
| 1429362_a_at | NM_030109    | Sf3b2         | splicing factor 3b, subunit 2                                                               | 1.53 |
| 1423521_at   | NM_010721    | Lmnb1         | lamin B1                                                                                    | 1.53 |
| 1455887_at   | NM_199035    | Alg8          | asparagine-linked glycosylation 8 homolog (yeast, alpha-1,3-glucosyltransferase)            | 1.53 |
| 1428069_at   | NM_025866    | Cdca7         | cell division cycle associated 7                                                            | 1.53 |
| 1419465_at   | NM_028186    | Nkd2          | naked cuticle 2 homolog (Drosophila)                                                        | 1.53 |
| 1424883_s_at | NM_001195485 | Srsf7         | serine/arginine-rich splicing factor 7                                                      | 1.53 |
| 1435731_x_at | AV139803     | ---           |                                                                                             | 1.53 |
| 1423302_a_at | NM_018878    | Paxip1        | PAX interacting (with transcription-activation domain) protein 1                            | 1.53 |
| 1448354_at   | NM_008062    | G6pdx         | glucose-6-phosphate dehydrogenase X-linked                                                  | 1.53 |
| 1430309_at   | NM_027707    | Nipbl         | Nipped-B homolog (Drosophila)                                                               | 1.53 |
| 1430991_at   | NR_015572    |               | RIKEN cDNA 1810014B01 gene                                                                  | 1.53 |
| 1428570_at   | NM_001122982 | Ccnc          | cyclin C                                                                                    | 1.53 |
| 1454681_at   | NM_194055    | Esrp1         | epithelial splicing regulatory protein 1                                                    | 1.53 |
| 1438546_x_at | NM_007451    | Slc25a5       | solute carrier family 25 (mitochondrial carrier, adenine nucleotide translocator), member 5 | 1.53 |
| 1416365_at   | NM_008302    | Hsp90ab1      | heat shock protein 90 alpha (cytosolic), class B member 1                                   | 1.53 |
| 1417200_at   | NM_001042485 | Tmem183a      | transmembrane protein 183A                                                                  | 1.53 |
| 1419660_at   | NM_025904    |               | RIKEN cDNA 1600012F09 gene                                                                  | 1.53 |
| 1429183_at   | NM_026163    | Pkp2          | plakophilin 2                                                                               | 1.53 |
| 1452681_at   | NM_001105667 | Dtymk         | deoxythymidylate kinase                                                                     | 1.53 |
| 1426326_at   | NM_053009    | Zfp91         | zinc finger protein 91                                                                      | 1.53 |
| 1433482_a_at | NM_057172    | Fubp1         | far upstream element (FUSE) binding protein 1                                               | 1.53 |

| Probe Set ID | Accession_ID | Gene     | Description                                                                                                                                 | Fold |
|--------------|--------------|----------|---------------------------------------------------------------------------------------------------------------------------------------------|------|
| 1437673_at   | NM_009524    | Wnt5a    | wingless-related MMTV integration site 5A                                                                                                   | 1.53 |
| 1438172_x_at | NM_027698    | Eri2     | exoribonuclease 2                                                                                                                           | 1.53 |
| 1455173_at   | NM_001130008 | Gspt1    | G1 to S phase transition 1                                                                                                                  | 1.53 |
| 1423089_at   | NM_016963    | Tmod3    | tropomodulin 3                                                                                                                              | 1.53 |
| 1455855_x_at | NM_001048061 | Hnrnpab  | heterogeneous nuclear ribonucleoprotein A/B                                                                                                 | 1.53 |
| 1450011_at   | NM_019657    | Hsd17b12 | hydroxysteroid (17-beta) dehydrogenase 12                                                                                                   | 1.54 |
| 1450915_at   | NM_009680    | Ap3b1    | adaptor-related protein complex 3, beta 1 subunit                                                                                           | 1.54 |
| 1425179_at   | NM_009171    | Shmt1    | serine hydroxymethyltransferase 1 (soluble)                                                                                                 | 1.54 |
| 1455387_at   | NM_001024205 | Nufip2   | nuclear fragile X mental retardation protein interacting protein 2                                                                          | 1.54 |
| 1427266_at   | NM_001081251 | Pbrm1    | polybromo 1                                                                                                                                 | 1.54 |
| 1424244_at   | NM_203507    | Rwdd4a   | RWD domain containing 4A                                                                                                                    | 1.54 |
| 1435826_at   | NM_001167730 | Rad18    | RAD18 homolog (S. cerevisiae)                                                                                                               | 1.54 |
| 1427938_at   | NM_019660    | Mycbp    | c-myc binding protein                                                                                                                       | 1.54 |
| 1440409_at   | NM_028087    | Gcnt3    | glucosaminyl (N-acetyl) transferase 3, mucin type                                                                                           | 1.54 |
| 1434240_at   | NM_001080995 |          | RIKEN cDNA 4632434I11 gene                                                                                                                  | 1.54 |
| 1424349_a_at | NM_001134829 | Lpgat1   | lysophosphatidylglycerol acyltransferase 1                                                                                                  | 1.54 |
| 1459734_at   | BB737833     |          |                                                                                                                                             | 1.54 |
| 1415994_at   | NM_021282    | Cyp2e1   | cytochrome P450, family 2, subfamily e, polypeptide 1                                                                                       | 1.54 |
| 1431304_a_at | NM_001042485 | Tmem183a | transmembrane protein 183A                                                                                                                  | 1.54 |
| 1460593_at   | NM_144796    | Susd4    | sushi domain containing 4                                                                                                                   | 1.54 |
| 1418371_at   | NM_001168471 | Dynll2   | dynein light chain LC8-type 2                                                                                                               | 1.54 |
| 1448896_at   | NM_008838    | Pigf     | phosphatidylinositol glycan anchor biosynthesis, class F                                                                                    | 1.54 |
| 1430053_a_at | NM_025942    | Ola1     | Obg-like ATPase 1                                                                                                                           | 1.54 |
| 1419503_at   | NM_011491    | Stc2     | stanniocalcin 2                                                                                                                             | 1.54 |
| 1434432_at   | NM_001007465 | Rffl     | ring finger and FYVE like domain containing protein                                                                                         | 1.54 |
| 1434007_at   | NM_001166633 | Gyltl1b  | glycosyltransferase-like 1B                                                                                                                 | 1.54 |
| 1423421_at   | NM_019683    | Ankrd49  | ankyrin repeat domain 49                                                                                                                    | 1.54 |
| 1451080_at   | NM_146144    | Usp1     | ubiquitin specific peptidase 1                                                                                                              | 1.54 |
| 1427037_at   | NM_001005331 | Eif4g1   | eukaryotic translation initiation factor 4, gamma 1                                                                                         | 1.54 |
| 1423137_at   | NM_019491    | Rala     | v-ral simian leukemia viral oncogene homolog A (ras related)                                                                                | 1.54 |
| 1417577_at   | NM_019510    | Trpc3    | transient receptor potential cation channel, subfamily C, member 3                                                                          | 1.54 |
| 1419046_at   | NM_021555    | Brp16    | brain protein 16                                                                                                                            | 1.54 |
| 1434882_at   | NM_026002    | Mtdh     | metadherin                                                                                                                                  | 1.54 |
| 1437267_x_at | NM_021510    | Hnrnph1  | Heterogeneous nuclear ribonucleoprotein H1                                                                                                  | 1.54 |
| 1453836_a_at | NM_001166249 | Mgll     | monoglyceride lipase                                                                                                                        | 1.54 |
| 1450416_at   | NM_001076789 | Cbx5     | chromobox homolog 5 (Drosophila HP1a)                                                                                                       | 1.54 |
| 1443978_at   | NM_172756    | Ankle1   | ankyrin repeat and LEM domain containing 1                                                                                                  | 1.54 |
| 1429633_at   | NM_172154    | Lcor     | ligand dependent nuclear receptor corepressor                                                                                               | 1.54 |
| 1437716_x_at | NM_145588    | Kif22    | kinesin family member 22                                                                                                                    | 1.54 |
| 1438955_x_at | NM_134084    | Ppif     | peptidylprolyl isomerase F (cyclophilin F)                                                                                                  | 1.54 |
| 1441272_at   | NM_010771    | Matr3    | Matrin 3                                                                                                                                    | 1.54 |
| 1424140_at   | NM_178389    | Gale     | galactose-4-epimerase, UDP                                                                                                                  | 1.54 |
| 1439047_s_at | NM_023042    | Recql    | RecQ protein-like                                                                                                                           | 1.54 |
| 1417181_a_at | NM_010629    | Kifap3   | kinesin-associated protein 3                                                                                                                | 1.54 |
| 1450854_at   | NM_011119    | Pa2g4    | proliferation-associated 2G4                                                                                                                | 1.55 |
| 1416335_at   | NM_010798    | Mif      | macrophage migration inhibitory factor                                                                                                      | 1.55 |
| 1416184_s_at | NM_001025427 |          | high mobility group AT-hook 1                                                                                                               | 1.55 |
| 1437422_at   | NM_009154    | Sema5a   | sema domain, seven thrombospondin repeats (type 1 and type 1-like), transmembrane domain (TM) and short cytoplasmic domain, (semaphorin) 5A | 1.55 |
| 1415800_at   | NM_010288    | Gja1     | gap junction protein, alpha 1                                                                                                               | 1.55 |
| 1416485_at   | NM_016897    | Timm23   | translocase of inner mitochondrial membrane 23 homolog (yeast)                                                                              | 1.55 |

| Probe Set ID | Accession_ID | Gene     | Description                                                                          | Fold |
|--------------|--------------|----------|--------------------------------------------------------------------------------------|------|
| 1426831_at   | NM_145542    | Ahcy1    | S-adenosylhomocysteine hydrolase-like 1                                              | 1.55 |
| 1436723_at   | NM_145924    | Cenpi    | centromere protein I                                                                 | 1.55 |
| 1456244_x_at | NM_023140    | Glrx3    | glutaredoxin 3                                                                       | 1.55 |
| 1436505_at   | NM_001081086 | Ppig     | peptidyl-prolyl isomerase G (cyclophilin G)                                          | 1.55 |
| 1431506_s_at | NM_001110129 | Ppih     | peptidyl prolyl isomerase H                                                          | 1.55 |
| 1438093_x_at | NM_001037999 | Dbi      | diazepam binding inhibitor                                                           | 1.55 |
| 1454992_at   | NM_007513    | Slc7a1   | solute carrier family 7 (cationic amino acid transporter, y+ system), member 1       | 1.55 |
| 1453240_a_at | NM_027045    | Gcap14   | granule cell antiserum positive 14                                                   | 1.55 |
| 1418566_s_at | NM_026023    | Nudcd2   | NudC domain containing 2                                                             | 1.55 |
| 1432187_at   | NM_145706    | Nup43    | nucleoporin 43                                                                       | 1.55 |
| 1423461_a_at | NM_011908    | Ubl3     | ubiquitin-like 3                                                                     | 1.55 |
| 1456730_x_at | NM_019673    | Actl6a   | actin-like 6A                                                                        | 1.55 |
| 1420935_a_at | NM_001130477 | Srrm1    | serine/arginine repetitive matrix 1                                                  | 1.55 |
| 1422508_at   | NM_007508    | Atp6v1a  | ATPase, H+ transporting, lysosomal V1 subunit A                                      | 1.55 |
| 1417587_at   | NM_001136082 | Timeless | timeless homolog (Drosophila)                                                        | 1.55 |
| 1437494_at   | NM_178907    | Mapkapk3 | mitogen-activated protein kinase-activated protein kinase 3                          | 1.55 |
| 1439740_s_at | NM_030724    | Uck2     | uridine-cytidine kinase 2                                                            | 1.55 |
| 1441911_x_at | NM_010256    | Gart     | phosphoribosylglycinamide formyltransferase                                          | 1.55 |
| 1428970_at   | NM_028108    | Naa50    | N(alpha)-acetyltransferase 50, NatE catalytic subunit                                | 1.55 |
| 1419755_at   | NM_013900    | Mfi2     | antigen p97 (melanoma associated) identified by monoclonal antibodies 133.2 and 96.5 | 1.55 |
| 1458439_a_at | NM_001110017 | Dzip3    | DAZ interacting protein 3, zinc finger                                               | 1.55 |
| 1426323_x_at | NM_001161737 | Siva1    | SIVA1, apoptosis-inducing factor                                                     | 1.55 |
| 1436509_at   | NM_175403    | Mlec     | malectin                                                                             | 1.55 |
| 1417878_at   | NM_007891    | E2f1     | E2F transcription factor 1                                                           | 1.55 |
| 1426958_at   | NM_029767    | Rps9     | ribosomal protein S9                                                                 | 1.55 |
| 1429095_at   | NM_025495    | Cenpp    | centromere protein P                                                                 | 1.55 |
| 1449194_at   | NM_025578    | Mrps25   | mitochondrial ribosomal protein S25                                                  | 1.55 |
| 1443867_at   | NM_001025572 | Ankrd12  | ankyrin repeat domain 12                                                             | 1.55 |
| 1438250_s_at | NM_001015889 |          | TAF9 RNA polymerase II, TATA box binding protein (TBP)-associated factor             | 1.56 |
| 1424778_at   | NM_178606    | Reep3    | receptor accessory protein 3                                                         | 1.56 |
| 1434583_at   | NM_177794    | Tmem26   | transmembrane protein 26                                                             | 1.56 |
| 1456240_x_at | NM_028023    | Cdca4    | cell division cycle associated 4                                                     | 1.56 |
| 1440383_at   | NM_001025312 | Dclre1b  | DNA cross-link repair 1B, PSO2 homolog (S. cerevisiae)                               | 1.56 |
| 1428527_at   | NM_001190156 | Snx7     | sorting nexin 7                                                                      | 1.56 |
| 1438096_a_at | NM_001105667 | Dtymk    | deoxythymidylate kinase                                                              | 1.56 |
| 1440199_at   | NM_177809    | Slc25a48 | solute carrier family 25, member 48                                                  | 1.56 |
| 1455162_at   | NM_001145948 | Ttc39a   | tetratricopeptide repeat domain 39A                                                  | 1.56 |
| 1426741_a_at | NM_172422    | Fastkd2  | FAST kinase domains 2                                                                | 1.56 |
| 1416873_a_at | NM_016756    | Cdk2     | cyclin-dependent kinase 2                                                            | 1.56 |
| 1422946_a_at | NM_010066    | Dnmt1    | DNA methyltransferase (cytosine-5) 1                                                 | 1.56 |
| 1417911_at   | NM_009828    | Ccna2    | cyclin A2                                                                            | 1.56 |
| 1420946_at   | NM_009530    | Atrx     | alpha thalassemia/mental retardation syndrome X-linked homolog (human)               | 1.56 |
| 1453067_at   | NM_027263    | Apitd1   | apoptosis-inducing, TAF9-like domain 1                                               | 1.56 |
| 1423149_at   | NM_011543    | Skp1a    | S-phase kinase-associated protein 1A                                                 | 1.56 |
| 1418820_s_at | NM_026479    | Zcchc10  | zinc finger, CCHC domain containing 10                                               | 1.56 |
| 1438631_x_at | NM_145607    | Ttc13    | tetratricopeptide repeat domain 13                                                   | 1.56 |
| 1456871_a_at | NM_001081409 | Phf20l1  | PHD finger protein 20-like 1                                                         | 1.56 |
| 1424600_at   | NM_001161621 | Abp1     | amiloride binding protein 1 (amine oxidase, copper-containing)                       | 1.56 |
| 1416627_at   | NM_016907    | Spint1   | serine protease inhibitor, Kunitz type 1                                             | 1.56 |
| 1460036_at   | NM_026887    | Ap1s2    | adaptor-related protein complex 1, sigma 2 subunit                                   | 1.56 |

| Probe Set ID | Accession_ID | Gene     | Description                                                                                                  | Fold |
|--------------|--------------|----------|--------------------------------------------------------------------------------------------------------------|------|
| 1439510_at   | NM_028232    | Sgol1    | shugoshin-like 1 (S. pombe)                                                                                  | 1.56 |
| 1424573_at   | NM_028876    | Tmed5    | transmembrane emp24 protein transport domain containing 5                                                    | 1.56 |
| 1444004_at   | NM_001033422 | Thoc2    | THO complex 2                                                                                                | 1.56 |
| 1416354_at   | NM_001166623 | Rbmx     | RNA binding motif protein, X chromosome                                                                      | 1.56 |
| 1439887_at   | NM_001160368 | Rnf152   | ring finger protein 152                                                                                      | 1.56 |
| 1438992_x_at | NM_009716    | Atf4     | activating transcription factor 4                                                                            | 1.56 |
| 1460448_s_at | NM_025978    | Ttc14    | tetratricopeptide repeat domain 14                                                                           | 1.56 |
| 1435534_a_at | NM_024214    | Tomm20   | translocase of outer mitochondrial membrane 20 homolog (yeast)                                               | 1.56 |
| 1420021_s_at | NM_001163018 | Suz12    | suppressor of zeste 12 homolog (Drosophila)                                                                  | 1.56 |
| 1449182_at   | NM_022984    | Retn     | resistin                                                                                                     | 1.56 |
| 1419294_at   | NM_025956    |          | RIKEN cDNA 1700011H14 gene                                                                                   | 1.56 |
| 1430875_a_at | NM_026550    | Pak1ip1  | PAK1 interacting protein 1                                                                                   | 1.56 |
| 1447640_s_at | NM_016768    | Pbx3     | pre B-cell leukemia transcription factor 3                                                                   | 1.56 |
| 1450093_s_at | NM_010731    | Zbtb7a   | zinc finger and BTB domain containing 7a                                                                     | 1.56 |
| 1418831_at   | NM_001162924 | Pkp3     | plakophilin 3                                                                                                | 1.56 |
| 1418713_at   | NM_025273    | Pcbd1    | pterin 4 alpha carbinolamine dehydratase/dimerization cofactor of hepatocyte nuclear factor 1 alpha (TCF1) 1 | 1.56 |
| 1417222_a_at | NM_133739    | Tmem123  | transmembrane protein 123                                                                                    | 1.56 |
| 1434512_x_at | NM_013663    | Srsf3    | serine/arginine-rich splicing factor 3                                                                       | 1.56 |
| 1450692_at   | NM_008446    | Kif4     | kinesin family member 4                                                                                      | 1.57 |
| 1448651_at   | NM_016918    | Nudt5    | nudix (nucleoside diphosphate linked moiety X)-type motif 5                                                  | 1.57 |
| 1420249_s_at | NM_009139    | Ccl6     | chemokine (C-C motif) ligand 6                                                                               | 1.57 |
| 1417026_at   | NM_026027    | Pfdn1    | prefoldin 1                                                                                                  | 1.57 |
| 1436413_at   | NM_001159544 | Frk      | fyn-related kinase                                                                                           | 1.57 |
| 1455834_x_at | NM_001040435 | Tacc3    | transforming, acidic coiled-coil containing protein 3                                                        | 1.57 |
| 1460698_a_at | NM_025468    | Sec11c   | SEC11 homolog C (S. cerevisiae)                                                                              | 1.57 |
| 1460354_a_at | NM_026759    | Mrpl13   | mitochondrial ribosomal protein L13                                                                          | 1.57 |
| 1455011_at   | NM_133774    | Stard4   | StAR-related lipid transfer (START) domain containing 4                                                      | 1.57 |
| 1417319_at   | NM_021495    | Pvrl3    | poliovirus receptor-related 3                                                                                | 1.57 |
| 1418565_at   | NM_001113564 | Serbp1   | serpine1 mRNA binding protein 1                                                                              | 1.57 |
| 1431893_a_at | NM_019501    | Pdss1    | prenyl (solanesyl) diphosphate synthase, subunit 1                                                           | 1.57 |
| 1434942_at   | NM_001081090 | Esf1     | ESF1, nucleolar pre-rRNA processing protein, homolog (S. cerevisiae)                                         | 1.57 |
| 1439444_x_at | NM_026775    | Tmed10   | transmembrane emp24-like trafficking protein 10 (yeast)                                                      | 1.57 |
| 1456566_x_at | NM_019869    | Rbm14    | RNA binding motif protein 14                                                                                 | 1.57 |
| 1422993_s_at | NM_011568    |          | RNA and export factor binding protein 2 /// THO complex 4                                                    | 1.57 |
| 1454842_a_at | NM_178640    | B3galnt2 | UDP-GalNAc:betaGlcNAc beta 1,3-galactosaminyltransferase, polypeptide 2                                      | 1.57 |
| 1429146_at   | NM_001160345 | Svip     | small VCP/p97-interacting protein                                                                            | 1.57 |
| 1431054_at   | NM_001191004 | Lsm6     | LSM6 homolog, U6 small nuclear RNA associated (S. cerevisiae)                                                | 1.57 |
| 1448586_at   | NM_015765    | Hspa14   | heat shock protein 14                                                                                        | 1.57 |
| 1433991_x_at | NM_001037999 | Dbi      | diazepam binding inhibitor                                                                                   | 1.57 |
| 1416150_a_at | NM_013663    | Srsf3    | serine/arginine-rich splicing factor 3                                                                       | 1.57 |
| 1419256_at   | NM_009260    | Spnb2    | spectrin beta 2                                                                                              | 1.57 |
| 1437480_at   | NM_025377    | Fam33a   | family with sequence similarity 33, member A                                                                 | 1.57 |
| 1422910_s_at | NM_025695    | Smc6     | structural maintenance of chromosomes 6                                                                      | 1.57 |
| 1418456_a_at | NM_019568    | Cxcl14   | chemokine (C-X-C motif) ligand 14                                                                            | 1.57 |
| 1434850_at   | NM_001033484 | Iqgap3   | IQ motif containing GTPase activating protein 3                                                              | 1.57 |
| 1422979_at   | NM_022724    | Suv39h2  | suppressor of variegation 3-9 homolog 2 (Drosophila)                                                         | 1.57 |
| 1433962_at   | NM_001099792 | Trmt61a  | tRNA methyltransferase 61 homolog A (S. cerevisiae)                                                          | 1.57 |
| 1422982_at   | NM_013476    | Ar       | androgen receptor                                                                                            | 1.57 |
| 1452983_at   | NM_026665    | Cep57    | centrosomal protein 57                                                                                       | 1.58 |
| 1454161_s_at | NM_021446    |          | RIKEN cDNA 0610007P14 gene                                                                                   | 1.58 |

| Probe Set ID | Accession_ID | Gene     | Description                                                                                                                         | Fold |
|--------------|--------------|----------|-------------------------------------------------------------------------------------------------------------------------------------|------|
| 1434554_at   | NM_197987    | Trim37   | tripartite motif-containing 37                                                                                                      | 1.58 |
| 1438976_x_at | NM_145569    | Mat2a    | methionine adenosyltransferase II, alpha                                                                                            | 1.58 |
| 1435333_at   | NM_026742    | Ndufaf4  | NADH dehydrogenase (ubiquinone) 1 alpha subcomplex, assembly factor 4                                                               | 1.58 |
| 1432188_s_at | NM_145706    | Nup43    | nucleoporin 43                                                                                                                      | 1.58 |
| 1421945_a_at | NM_001042556 | Rpf2     | ribosome production factor 2 homolog (S. cerevisiae)                                                                                | 1.58 |
| 1428902_at   | NM_021439    | Chst11   | carbohydrate sulfotransferase 11                                                                                                    | 1.58 |
| 1449044_at   | NM_025380    | Eef1e1   | eukaryotic translation elongation factor 1 epsilon 1                                                                                | 1.58 |
| 1456541_x_at | NM_179203    | Atad3a   | ATPase family, AAA domain containing 3A                                                                                             | 1.58 |
| 1447899_x_at | NM_008532    | Epcam    | epithelial cell adhesion molecule                                                                                                   | 1.58 |
| 1426808_at   | NM_001145953 | Lgals3   | lectin, galactose binding, soluble 3                                                                                                | 1.58 |
| 1423117_at   | NM_001159603 | Pum1     | pumilio 1 (Drosophila)                                                                                                              | 1.58 |
| 1451640_a_at | NM_001005523 | Rsrc2    | arginine/serine-rich coiled-coil 2                                                                                                  | 1.58 |
| 1439200_x_at | BE686792     |          |                                                                                                                                     | 1.58 |
| 1416152_a_at | NM_013663    | Srsf3    | serine/arginine-rich splicing factor 3                                                                                              | 1.58 |
| 1455904_at   | NR_002840    |          | growth arrest specific 5 /// small nucleolar RNA, C/D box 47                                                                        | 1.58 |
| 1418023_at   | NM_053089    | Naa15    | N(alpha)-acetyltransferase 15, NatA auxiliary subunit                                                                               | 1.58 |
| 1429769_at   | NM_172627    | Pggt1b   | protein geranylgeranyltransferase type I, beta subunit                                                                              | 1.58 |
| 1456055_x_at | NM_011131    | Pold1    | polymerase (DNA directed), delta 1, catalytic subunit                                                                               | 1.58 |
| 1416439_at   | NM_023203    | Dctpp1   | dCTP pyrophosphatase 1                                                                                                              | 1.58 |
| 1426755_at   | NM_175451    | Ckap4    | cytoskeleton-associated protein 4                                                                                                   | 1.58 |
| 1422005_at   | NM_011163    | Eif2ak2  | eukaryotic translation initiation factor 2-alpha kinase 2                                                                           | 1.58 |
| 1452210_at   | NM_177372    | Dna2     | DNA replication helicase 2 homolog (yeast)                                                                                          | 1.58 |
| 1434300_at   | NM_001114977 |          | RIKEN cDNA 2610101N10 gene                                                                                                          | 1.58 |
| 1417575_at   | NM_001177841 | Otub2    | OTU domain, ubiquitin aldehyde binding 2                                                                                            | 1.58 |
| 1435122_x_at | NM_010066    | Dnmt1    | DNA methyltransferase (cytosine-5) 1                                                                                                | 1.58 |
| 1450744_at   | NM_138953    | Ell2     | elongation factor RNA polymerase II 2                                                                                               | 1.58 |
| 1429415_at   | NM_027230    | Zmynd8   | zinc finger, MYND-type containing 8                                                                                                 | 1.58 |
| 1455726_at   | NM_001033236 | Gm71     | predicted gene 71                                                                                                                   | 1.58 |
| 1450850_at   | NM_009510    | Ezr      | ezrin                                                                                                                               | 1.58 |
| 1419452_at   | NM_001159866 | Uchl5    | ubiquitin carboxyl-terminal esterase L5                                                                                             | 1.58 |
| 1456492_at   | NM_001167939 |          | RIKEN cDNA 9130404D08 gene                                                                                                          | 1.59 |
| 1448531_at   | NM_010722    | Lmnb2    | lamin B2                                                                                                                            | 1.59 |
| 1456617_a_at | NM_026030    | Eif2s2   | eukaryotic translation initiation factor 2, subunit 2 (beta)                                                                        | 1.59 |
| 1440916_at   | NM_001101431 |          | RIKEN cDNA 2510049J12 gene                                                                                                          | 1.59 |
| 1427147_at   | NM_199467    |          | RIKEN cDNA F730047E07 gene                                                                                                          | 1.59 |
| 1448953_at   | NM_001042527 | Blm      | Bloom syndrome, RecQ helicase-like                                                                                                  | 1.59 |
| 1415988_at   | NM_133808    | Hdlbp    | high density lipoprotein (HDL) binding protein                                                                                      | 1.59 |
| 1452232_at   | NM_001167981 | Galnt7   | UDP-N-acetyl-alpha-D-galactosamine: polypeptide N-acetylgalactosaminyltransferase 7                                                 | 1.59 |
| 1429882_at   | NR_028428    |          | cadherin 11 pseudogene                                                                                                              | 1.59 |
| 1438016_at   | NM_001030307 | Dkc1     | dyskeratosis congenita 1, dyskerin homolog (human)                                                                                  | 1.59 |
| 1440373_at   | BB041057     |          |                                                                                                                                     | 1.59 |
| 1420019_at   | NM_001168679 | Tspan8   | Tetraspanin 8                                                                                                                       | 1.59 |
| 1447877_x_at | NM_010066    | Dnmt1    | DNA methyltransferase (cytosine-5) 1                                                                                                | 1.59 |
| 1450982_at   | NM_012030    | Slc9a3r1 | solute carrier family 9 (sodium/hydrogen exchanger), member 3 regulator 1                                                           | 1.59 |
| 1441733_s_at | NM_175749    | Nup153   | nucleoporin 153                                                                                                                     | 1.59 |
| 1449040_a_at | NM_009266    | Sephs2   | selenophosphate synthetase 2                                                                                                        | 1.59 |
| 1457755_at   | NM_010320    | Gng8     | guanine nucleotide binding protein (G protein), gamma 8                                                                             | 1.59 |
| 1438115_a_at | NM_012030    | Slc9a3r1 | solute carrier family 9 (sodium/hydrogen exchanger), member 3 regulator 1                                                           | 1.59 |
| 1415916_a_at | NM_138745    | Mthfd1   | methylenetetrahydrofolate dehydrogenase (NADP+ dependent), methenyltetrahydrofolate cyclohydrolase, formyltetrahydrofolate synthase | 1.59 |

| Probe Set ID | Accession_ID | Gene    | Description                                                            | Fold |
|--------------|--------------|---------|------------------------------------------------------------------------|------|
| 1428797_at   | NM_001035123 | Setd6   | SET domain containing 6                                                | 1.59 |
| 1434056_a_at | NM_001033305 | Ndufb6  | NADH dehydrogenase (ubiquinone) 1 beta subcomplex, 6                   | 1.59 |
| 1447919_x_at | NM_028177    | Ndufab1 | NADH dehydrogenase (ubiquinone) 1, alpha/beta subcomplex, 1            | 1.59 |
| 1443827_x_at | NM_030565    | Fam20c  | family with sequence similarity 20, member C                           | 1.59 |
| 1454169_a_at | NM_029495    | Epsti1  | epithelial stromal interaction 1 (breast)                              | 1.59 |
| 1418443_at   | NM_001035226 | Xpo1    | exportin 1, CRM1 homolog (yeast)                                       | 1.59 |
| 1459838_s_at | NM_001017525 | Btbd11  | BTB (POZ) domain containing 11                                         | 1.59 |
| 1420626_at   | NM_026113    | Gtf3c6  | general transcription factor IIIC, polypeptide 6, alpha                | 1.59 |
| 1423201_at   | NM_011308    | Ncor1   | nuclear receptor co-repressor 1                                        | 1.59 |
| 1422513_at   | NM_007634    | Ccnf    | cyclin F                                                               | 1.59 |
| 1452036_a_at | NM_001080129 | Tmpo    | thymopoietin                                                           | 1.60 |
| 1451456_at   | NM_198652    | Hjrp    | Holliday junction recognition protein                                  | 1.60 |
| 1417233_at   | NM_133928    | Chchd4  | coiled-coil-helix-coiled-coil-helix domain containing 4                | 1.60 |
| 1430134_a_at | NM_198246    | Yars2   | tyrosyl-tRNA synthetase 2 (mitochondrial)                              | 1.60 |
| 1424784_at   | NM_001083918 | Gm13139 | predicted gene 13139                                                   | 1.60 |
| 1426607_at   | NM_001039244 | Gm7120  | predicted gene 7120                                                    | 1.60 |
| 1426739_at   | NM_021720    | Donson  | downstream neighbor of SON                                             | 1.60 |
| 1417037_at   | NM_001163791 | Orc6    | origin recognition complex, subunit 6                                  | 1.60 |
| 1428389_s_at | NM_175639    | Wdr43   | WD repeat domain 43                                                    | 1.60 |
| 1437526_x_at | NM_028871    | Hnrnpr  | heterogeneous nuclear ribonucleoprotein R                              | 1.60 |
| 1455983_at   | NM_001110162 | Cdca2   | cell division cycle associated 2                                       | 1.60 |
| 1451128_s_at | NM_145588    | Kif22   | kinesin family member 22                                               | 1.60 |
| 1434275_at   | NM_028186    | Nkd2    | naked cuticle 2 homolog (Drosophila)                                   | 1.60 |
| 1435005_at   | NM_173762    | Cenpe   | centromere protein E                                                   | 1.60 |
| 1417921_at   | NM_026312    |         | RIKEN cDNA 2610029G23 gene                                             | 1.60 |
| 1434851_s_at | NM_177638    | Crb3    | crumbs homolog 3 (Drosophila)                                          | 1.60 |
| 1418369_at   | NM_008921    | Prim1   | DNA primase, p49 subunit                                               | 1.60 |
| 1457032_at   | NM_001081277 | Ak5     | adenylate kinase 5                                                     | 1.60 |
| 1449116_a_at | NM_001105667 | Dtymk   | deoxythymidylate kinase                                                | 1.60 |
| 1438064_at   | NM_011732    | Ybx1    | Y box protein 1                                                        | 1.60 |
| 1440816_x_at | NM_134040    | Ddx1    | DEAD (Asp-Glu-Ala-Asp) box polypeptide 1                               | 1.60 |
| 1425533_a_at | NM_001111272 | Stau2   | staufen (RNA binding protein) homolog 2 (Drosophila)                   | 1.60 |
| 1437633_at   | NM_001081379 | Ankrd11 | ankyrin repeat domain 11                                               | 1.60 |
| 1424019_at   | NM_138747    | Nop2    | NOP2 nucleolar protein homolog (yeast)                                 | 1.60 |
| 1420947_at   | NM_009530    | Atrx    | alpha thalassemia/mental retardation syndrome X-linked homolog (human) | 1.60 |
| 1433540_x_at | NM_172707    | Ppp1cb  | protein phosphatase 1, catalytic subunit, beta isoform                 | 1.60 |
| 1434201_at   | NM_001114385 | Chrdl1  | chordin-like 1                                                         | 1.60 |
| 1434158_at   | NM_146041    | Gm5     | GDP-mannose 4, 6-dehydratase                                           | 1.60 |
| 1421817_at   | NM_010344    | Gsr     | glutathione reductase                                                  | 1.60 |
| 1436746_at   | NM_001185020 | Wnk1    | WNK lysine deficient protein kinase 1                                  | 1.61 |
| 1429720_at   | NM_030153    | Naa35   | N(alpha)-acetyltransferase 35, NatC auxiliary subunit                  | 1.61 |
| 1435372_a_at | NM_011119    | Pa2g4   | proliferation-associated 2G4                                           | 1.61 |
| 1440177_at   | NM_001081097 | Grik3   | glutamate receptor, ionotropic, kainate 3                              | 1.61 |
| 1454725_at   | NM_198102    | Tra2a   | transformer 2 alpha homolog (Drosophila)                               | 1.61 |
| 1424641_a_at | NM_153552    | Thoc1   | THO complex 1                                                          | 1.61 |
| 1436946_s_at | NM_010318    |         | guanine nucleotide binding protein (G protein), gamma 5                | 1.61 |
| 1433569_x_at | NM_009391    | Ran     | RAN, member RAS oncogene family                                        | 1.61 |
| 1424136_a_at | NM_001110129 |         | peptidyl-prolyl cis-trans isomerase H-like                             | 1.61 |
| 1456590_x_at | NM_009658    | Akr1b3  | aldo-keto reductase family 1, member B3 (aldose reductase)             | 1.61 |
| 1439436_x_at | NM_016692    | Incnp   | inner centromere protein                                               | 1.61 |
| 1451649_a_at | NM_028599    | Wdr75   | WD repeat domain 75                                                    | 1.61 |
| 1448690_at   | NM_008430    | Kcnk1   | potassium channel, subfamily K, member 1                               | 1.61 |

| Probe Set ID | Accession_ID | Gene    | Description                                                                                                       | Fold |
|--------------|--------------|---------|-------------------------------------------------------------------------------------------------------------------|------|
| 1417373_at   | NM_009447    | Tuba4a  | tubulin, alpha 4A                                                                                                 | 1.61 |
| 1422546_at   | NM_001042707 | Ilf3    | interleukin enhancer binding factor 3                                                                             | 1.61 |
| 1417767_at   | NM_025558    | Cyb5b   | cytochrome b5 type B                                                                                              | 1.61 |
| 1420477_at   | NM_001146707 | Nap111  | nucleosome assembly protein 1-like 1                                                                              | 1.61 |
| 1423982_at   | NM_001080387 | Srsf10  | serine/arginine-rich splicing factor 10                                                                           | 1.61 |
| 1452242_at   | NM_001164362 | Cep55   | centrosomal protein 55                                                                                            | 1.61 |
| 1453794_at   | NM_001136556 | Fer14   | fer-1-like 4 (C. elegans)                                                                                         | 1.61 |
| 1421230_a_at | NM_054043    | Msi2    | Musashi homolog 2 (Drosophila)                                                                                    | 1.61 |
| 1438097_at   | NM_011227    | Rab20   | RAB20, member RAS oncogene family                                                                                 | 1.61 |
| 1449015_at   | NM_020509    | Retnla  | resistin like alpha                                                                                               | 1.61 |
| 1418428_at   | NM_008448    | Kif5b   | kinesin family member 5B                                                                                          | 1.62 |
| 1435484_at   | NM_017391    | Slc5a3  | solute carrier family 5 (inositol transporters), member 3                                                         | 1.62 |
| 1451457_at   | NM_172769    | Sc5d    | sterol-C5-desaturase (fungal ERG3, delta-5-desaturase) homolog (S. cerevisiae)                                    | 1.62 |
| 1418206_at   | NM_022324    | Sdf2l1  | stromal cell-derived factor 2-like 1                                                                              | 1.62 |
| 1423766_at   | NM_026550    | Pak1ip1 | PAK1 interacting protein 1                                                                                        | 1.62 |
| 1429261_at   | NM_029384    |         | RIKEN cDNA 2210411K11 gene                                                                                        | 1.62 |
| 1416962_at   | NM_001197082 | Rcc1    | regulator of chromosome condensation 1                                                                            | 1.62 |
| 1449846_at   | NM_007895    | Ear2    | eosinophil-associated, ribonuclease A family, member 2                                                            | 1.62 |
| 1456475_s_at | NM_011158    | Prkar2b | protein kinase, cAMP dependent regulatory, type II beta                                                           | 1.62 |
| 1433640_at   | NM_057172    | Fubp1   | far upstream element (FUSE) binding protein 1                                                                     | 1.62 |
| 1456262_at   | NM_148930    | Rbm5    | RNA binding motif protein 5                                                                                       | 1.62 |
| 1451345_at   | NM_024433    | Mtap    | methylothioadenosine phosphorylase                                                                                | 1.62 |
| 1417445_at   | NM_023294    | Ndc80   | NDC80 homolog, kinetochore complex component (S. cerevisiae)                                                      | 1.62 |
| 1449434_at   | NM_007606    | Car3    | carbonic anhydrase 3                                                                                              | 1.62 |
| 1442109_at   | BE989344     |         |                                                                                                                   | 1.62 |
| 1417835_at   | NM_008645    | Mug1    | murinoglobulin 1                                                                                                  | 1.62 |
| 1419522_at   | NM_026021    | Zmynd19 | zinc finger, MYND domain containing 19                                                                            | 1.62 |
| 1422944_a_at | NM_019670    | Diap3   | diaphanous homolog 3 (Drosophila)                                                                                 | 1.62 |
| 1424180_a_at | NM_011869    | Med24   | mediator complex subunit 24                                                                                       | 1.62 |
| 1430530_s_at | NM_026393    | Nmral1  | NmrA-like family domain containing 1                                                                              | 1.62 |
| 1428232_at   | NM_001013391 | Cpsf6   | cleavage and polyadenylation specific factor 6                                                                    | 1.62 |
| 1460256_at   | NM_007606    | Car3    | carbonic anhydrase 3                                                                                              | 1.62 |
| 1435659_a_at | NM_009415    | Tpi1    | triosephosphate isomerase 1                                                                                       | 1.62 |
| 1438761_a_at | NM_013614    | Odc1    | ornithine decarboxylase, structural 1                                                                             | 1.62 |
| 1438445_at   | NM_028175    | Lrrc8e  | leucine rich repeat containing 8 family, member E                                                                 | 1.62 |
| 1436298_x_at | NM_025939    | Paics   | phosphoribosylaminoimidazole carboxylase, phosphoribosylaminoribosylaminoimidazole, succinocarboxamide synthetase | 1.62 |
| 1439377_x_at | NM_023223    | Cdc20   | cell division cycle 20 homolog (S. cerevisiae)                                                                    | 1.62 |
| 1423120_at   | NM_031156    | Ide     | insulin degrading enzyme                                                                                          | 1.62 |
| 1417569_at   | NM_001170866 | Ncald   | neurocalcin delta                                                                                                 | 1.62 |
| 1417214_at   | NM_001082553 | Rab27b  | RAB27b, member RAS oncogene family                                                                                | 1.62 |
| 1418475_at   | NM_011325    | Scnn1b  | sodium channel, nonvoltage-gated 1 beta                                                                           | 1.62 |
| 1416915_at   | NM_010830    | Msh6    | mutS homolog 6 (E. coli)                                                                                          | 1.62 |
| 1437872_at   | NM_178728    | Napepld | N-acyl phosphatidylethanolamine phospholipase D                                                                   | 1.62 |
| 1429678_at   | NM_027482    |         | RIKEN cDNA 5730508B09 gene                                                                                        | 1.62 |
| 1438677_at   | NM_026361    | Pkp4    | plakophilin 4                                                                                                     | 1.63 |
| 1451485_at   | NM_026313    | Luc7l3  | LUC7-like 3 (S. cerevisiae)                                                                                       | 1.63 |
| 1455990_at   | NM_024245    | Kif23   | kinesin family member 23                                                                                          | 1.63 |
| 1436533_at   | NM_013835    | Trove2  | TROVE domain family, member 2                                                                                     | 1.63 |
| 1438545_at   | NM_007451    | Slc25a5 | solute carrier family 25 (mitochondrial carrier, adenine nucleotide translocator), member 5                       | 1.63 |
| 1455488_at   | NM_173400    | Haus6   | HAUS augmin-like complex, subunit 6                                                                               | 1.63 |



| Probe Set ID | Accession_ID | Gene    | Description                                                                   | Fold |
|--------------|--------------|---------|-------------------------------------------------------------------------------|------|
| 1416422_a_at | NM_001110145 | Ssb     | Sjogren syndrome antigen B                                                    | 1.63 |
| 1435597_at   | NM_001029856 | Atad5   | ATPase family, AAA domain containing 5                                        | 1.63 |
| 1429588_at   | NM_026054    |         | RIKEN cDNA 2810474O19 gene                                                    | 1.63 |
| 1426777_a_at | NM_001167745 | Wasl    | Wiskott-Aldrich syndrome-like (human)                                         | 1.63 |
| 1422734_a_at | NM_010848    | Myb     | myeloblastosis oncogene                                                       | 1.63 |
| 1427063_at   | NM_001033304 |         | RIKEN cDNA 5330417C22 gene                                                    | 1.63 |
| 1424991_s_at | NM_021288    |         | thymidylate synthase /// thymidylate synthase, pseudogene                     | 1.63 |
| 1450842_a_at | NM_007681    | Cenpa   | centromere protein A                                                          | 1.63 |
| 1426946_at   | NM_023579    | Ipo5    | importin 5                                                                    | 1.63 |
| 1453596_at   | NM_010496    | Id2     | inhibitor of DNA binding 2                                                    | 1.63 |
| 1434210_s_at | NM_008377    | Lrig1   | leucine-rich repeats and immunoglobulin-like domains 1                        | 1.63 |
| 1426349_s_at | NM_001080129 | Tmpo    | thymopoietin                                                                  | 1.63 |
| 1438091_a_at | NM_016750    |         | H2A histone family, member Z /// hypothetical LOC100504949                    | 1.63 |
| 1453146_at   | NM_025709    | Gapvd1  | GTPase activating protein and VPS9 domains 1                                  | 1.63 |
| 1434678_at   | NM_134163    | Mbnl3   | muscleblind-like 3 (Drosophila)                                               | 1.63 |
| 1450401_at   | NM_054089    | Tgs1    | trimethylguanosine synthase homolog (S. cerevisiae)                           | 1.63 |
| 1444740_at   | NM_001164201 | Lass3   | LAG1 homolog, ceramide synthase 3                                             | 1.63 |
| 1452457_a_at | NM_031869    | Prkab1  | protein kinase, AMP-activated, beta 1 non-catalytic subunit                   | 1.63 |
| 1416144_a_at | NM_001042620 | Dhx15   | DEAH (Asp-Glu-Ala-His) box polypeptide 15                                     | 1.63 |
| 1456874_at   | NM_201518    | Flrt2   | fibronectin leucine rich transmembrane protein 2                              | 1.63 |
| 1438527_at   | NM_013762    |         | predicted gene 5879 /// ribosomal protein L3                                  | 1.63 |
| 1452438_s_at | NM_001081092 | Taf4a   | TAF4A RNA polymerase II, TATA box binding protein (TBP)-associated factor     | 1.63 |
| 1452741_s_at | NM_001145820 | Gpd2    | glycerol phosphate dehydrogenase 2, mitochondrial                             | 1.63 |
| 1439462_x_at | NM_026775    | Tmed10  | transmembrane emp24-like trafficking protein 10 (yeast)                       | 1.63 |
| 1422547_at   | NM_011239    | Ranbp1  | RAN binding protein 1                                                         | 1.63 |
| 1427504_s_at | NM_011358    | Srsf2   | serine/arginine-rich splicing factor 2                                        | 1.63 |
| 1454993_a_at | NM_013663    | Srsf3   | serine/arginine-rich splicing factor 3                                        | 1.63 |
| 1454943_a_at | NM_018878    | Paxip1  | PAX interacting (with transcription-activation domain) protein 1              | 1.63 |
| 1435325_at   | NM_177561    | Usp46   | ubiquitin specific peptidase 46                                               | 1.64 |
| 1451884_a_at | NM_001110101 | Lsm2    | LSM2 homolog, U6 small nuclear RNA associated (S. cerevisiae)                 | 1.64 |
| 1416290_a_at | NM_011874    | Psmc4   | proteasome (prosome, macropain) 26S subunit, ATPase, 4                        | 1.64 |
| 1417923_at   | NM_001195046 | Pak3    | p21 protein (Cdc42/Rac)-activated kinase 3                                    | 1.64 |
| 1449176_a_at | NM_007832    | Dck     | deoxycytidine kinase                                                          | 1.64 |
| 1454694_a_at | NM_011623    | Top2a   | topoisomerase (DNA) II alpha                                                  | 1.64 |
| 1417075_at   | NM_025591    | Fam136a | family with sequence similarity 136, member A                                 | 1.64 |
| 1433893_s_at | NM_017407    | Spag5   | sperm associated antigen 5                                                    | 1.64 |
| 1449446_at   | NM_025602    | Ccdc59  | coiled-coil domain containing 59                                              | 1.64 |
| 1423682_a_at | NM_028023    | Cdca4   | cell division cycle associated 4                                              | 1.64 |
| 1451610_at   | NM_153576    | Cxcl17  | chemokine (C-X-C motif) ligand 17                                             | 1.64 |
| 1423066_at   | NM_007872    | Dnmt3a  | DNA methyltransferase 3A                                                      | 1.64 |
| 1450677_at   | NM_007691    | Chek1   | checkpoint kinase 1 homolog (S. pombe)                                        | 1.64 |
| 1422666_at   | NM_001161844 | Cblc    | Casitas B-lineage lymphoma c                                                  | 1.64 |
| 1449321_x_at | NM_009243    |         | serine (or cysteine) peptidase inhibitor, clade A, member 1A /                | 1.64 |
| 1435336_at   | NM_001004177 | Celsr2  | cadherin, EGF LAG seven-pass G-type receptor 2 (flamingo homolog, Drosophila) | 1.64 |
| 1422556_at   | NM_010303    | Gna13   | guanine nucleotide binding protein, alpha 13                                  | 1.64 |
| 1416433_at   | NM_011284    | Rpa2    | replication protein A2                                                        | 1.64 |
| 1451208_at   | NM_144866    | Etf1    | eukaryotic translation termination factor 1                                   | 1.64 |
| 1418035_a_at | NM_008922    | Prim2   | DNA primase, p58 subunit                                                      | 1.64 |
| 1460041_at   | NM_201411    | Flrt1   | fibronectin leucine rich transmembrane protein 1                              | 1.64 |
| 1420023_at   | NM_144866    | Etf1    | eukaryotic translation termination factor 1                                   | 1.64 |
| 1439269_x_at | NM_008568    | Mcm7    | minichromosome maintenance deficient 7 (S. cerevisiae)                        | 1.64 |
| 1416480_a_at | NM_001112668 |         | predicted gene 9790 /// HIG1 domain family, member 1A                         | 1.64 |

| Probe Set ID | Accession_ID | Gene      | Description                                                                                                         | Fold |
|--------------|--------------|-----------|---------------------------------------------------------------------------------------------------------------------|------|
| 1420967_at   | NM_181325    | Slc25a15  | solute carrier family 25 (mitochondrial carrier ornithine transporter), member 15                                   | 1.64 |
| 1437850_a_at | NM_001109745 | Cnbp      | cellular nucleic acid binding protein                                                                               | 1.64 |
| 1453299_a_at | NM_001123371 |           | purine-nucleoside phosphorylase                                                                                     | 1.64 |
| 1416633_a_at | NM_026635    | Fam96a    | family with sequence similarity 96, member A                                                                        | 1.65 |
| 1439463_x_at | NM_001111282 |           | predicted gene 2710 /// high-mobility group (nonhistone chromosomal) protein 1-like 1 /// high mobility group box 1 | 1.65 |
| 1449211_at   | NM_011794    |           | bisphosphate 3'-nucleotidase 1 /// hypothetical LOC100504952                                                        | 1.65 |
| 1449089_at   | NM_173440    | Nrip1     | nuclear receptor interacting protein 1                                                                              | 1.65 |
| 1416345_at   | NM_013898    | Timm8a1   | translocase of inner mitochondrial membrane 8 homolog a1 (yeast)                                                    | 1.65 |
| 1423938_at   | NM_145438    | Llgl2     | lethal giant larvae homolog 2 (Drosophila)                                                                          | 1.65 |
| 1425495_at   | NM_001024846 | Zfp62     | zinc finger protein 62                                                                                              | 1.65 |
| 1439266_a_at | NM_025901    | Polr3k    | polymerase (RNA) III (DNA directed) polypeptide K                                                                   | 1.65 |
| 1451236_at   | NM_001164212 | Rerg      | RAS-like, estrogen-regulated, growth-inhibitor                                                                      | 1.65 |
| 1417374_at   | NM_009447    | Tuba4a    | tubulin, alpha 4A                                                                                                   | 1.65 |
| 1452458_s_at | NM_001081406 | Ppil5     | peptidylprolyl isomerase (cyclophilin) like 5                                                                       | 1.65 |
| 1428869_at   | NM_001039351 | Nolc1     | nucleolar and coiled-body phosphoprotein 1                                                                          | 1.65 |
| 1417884_at   | NM_001029842 | Slc16a6   | solute carrier family 16 (monocarboxylic acid transporters), member 6                                               | 1.65 |
| 1433807_at   | NM_175265    |           | RIKEN cDNA 6720463M24 gene                                                                                          | 1.65 |
| 1460392_a_at | NM_175009    | Eny2      | enhancer of yellow 2 homolog (Drosophila)                                                                           | 1.65 |
| 1423065_at   | NM_007872    | Dnmt3a    | DNA methyltransferase 3A                                                                                            | 1.65 |
| 1424342_at   | NM_001159349 | Fytd1     | forty-two-three domain containing 1                                                                                 | 1.65 |
| 1433870_at   | NM_146026    | Prr15l    | proline rich 15-like                                                                                                | 1.65 |
| 1422580_at   | NM_010858    | Myl4      | myosin, light polypeptide 4                                                                                         | 1.65 |
| 1437318_at   | NM_001195046 | Pak3      | p21 protein (Cdc42/Rac)-activated kinase 3                                                                          | 1.65 |
| 1429624_at   | NM_025690    | Sltm      | SAFB-like, transcription modulator                                                                                  | 1.65 |
| 1438287_x_at | NM_197982    | Ddx39     | DEAD (Asp-Glu-Ala-Asp) box polypeptide 39                                                                           | 1.65 |
| 1422483_a_at | NM_007808    | Cycs      | cytochrome c, somatic                                                                                               | 1.65 |
| 1434031_at   | NM_001040686 | Zfp692-ps | zinc finger protein 692, pseudogene                                                                                 | 1.65 |
| 1460474_at   | C76835       |           | RIKEN cDNA 2610028L16 gene                                                                                          | 1.65 |
| 1425159_at   | NM_026680    | Golt1a    | golgi transport 1 homolog A (S. cerevisiae)                                                                         | 1.66 |
| 1422573_at   | NM_009667    | Ampd3     | adenosine monophosphate deaminase 3                                                                                 | 1.66 |
| 1421784_a_at | NM_007910    | Efna4     | ephrin A4                                                                                                           | 1.66 |
| 1439966_x_at | NM_053196    | Sfxn2     | sideroflexin 2                                                                                                      | 1.66 |
| 1455496_at   | NM_001159519 | Pfas      | phosphoribosylformylglycinamide synthase (FGAR amidotransferase)                                                    | 1.66 |
| 1431028_a_at | NM_001114339 | Pank1     | pantothenate kinase 1                                                                                               | 1.66 |
| 1433827_at   | NM_001038999 | Atp8a1    | ATPase, aminophospholipid transporter (APLT), class I, type 8A, member 1                                            | 1.66 |
| 1417395_at   | NM_010637    | Klf4      | Kruppel-like factor 4 (gut)                                                                                         | 1.66 |
| 1456653_a_at | NM_001170785 | Mthfd1l   | methylenetetrahydrofolate dehydrogenase (NADP+ dependent) 1-like                                                    | 1.66 |
| 1415964_at   | NM_009127    | Scd1      | stearoyl-Coenzyme A desaturase 1                                                                                    | 1.66 |
| 1438984_x_at | NM_008945    | Psmb4     | proteasome (prosome, macropain) subunit, beta type 4                                                                | 1.66 |
| 1434815_a_at | NM_178907    | Mapkapk3  | mitogen-activated protein kinase-activated protein kinase 3                                                         | 1.66 |
| 1437187_at   | NM_178609    | E2f7      | E2F transcription factor 7                                                                                          | 1.66 |
| 1416748_a_at | NM_018736    | Mre11a    | meiotic recombination 11 homolog A (S. cerevisiae)                                                                  | 1.66 |
| 1429169_at   | NM_001166409 | Rbm3      | RNA binding motif protein 3                                                                                         | 1.66 |
| 1418036_at   | NM_008922    | Prim2     | DNA primase, p58 subunit                                                                                            | 1.66 |
| 1415909_at   | NM_016737    | Stip1     | stress-induced phosphoprotein 1                                                                                     | 1.66 |
| 1415903_at   | NM_001166456 | Slc38a1   | solute carrier family 38, member 1                                                                                  | 1.66 |
| 1416595_at   | NM_025485    | Mrps22    | mitochondrial ribosomal protein S22                                                                                 | 1.66 |
| 1428409_at   | NM_028108    | Naa50     | N(alpha)-acetyltransferase 50, NatE catalytic subunit                                                               | 1.66 |

| Probe Set ID | Accession_ID | Gene     | Description                                                                        | Fold |
|--------------|--------------|----------|------------------------------------------------------------------------------------|------|
| 1415772_at   | NM_010880    | Ncl      | nucleolin                                                                          | 1.66 |
| 1426908_at   | NM_001167981 | Galnt7   | UDP-N-acetyl-alpha-D-galactosamine: polypeptide N-acetylglactosaminyltransferase 7 | 1.67 |
| 1429093_at   | NM_001017966 | Ddi2     | DNA-damage inducible protein 2                                                     | 1.67 |
| 1436472_at   | NM_172796    | Slfn9    | schlafen 9                                                                         | 1.67 |
| 1454659_at   | NM_001161515 | Dctd     | dCMP deaminase                                                                     | 1.67 |
| 1459984_at   | NM_177389    | Mia3     | melanoma inhibitory activity 3                                                     | 1.67 |
| 1456865_x_at | NM_021511    | Rrs1     | RRS1 ribosome biogenesis regulator homolog (S. cerevisiae)                         | 1.67 |
| 1423184_at   | NM_011365    | Itsn2    | intersectin 2                                                                      | 1.67 |
| 1437611_x_at | NM_134471    | Kif2c    | kinesin family member 2C                                                           | 1.67 |
| 1417797_a_at | NM_001083916 |          | RIKEN cDNA 1810019J16 gene                                                         | 1.67 |
| 1419038_a_at | NM_007788    | Csnk2a1  | casein kinase 2, alpha 1 polypeptide                                               | 1.67 |
| 1439695_a_at | NM_183046    | Kif20b   | kinesin family member 20B                                                          | 1.67 |
| 1423249_at   | NM_010918    | Nktr     | natural killer tumor recognition sequence                                          | 1.67 |
| 1423295_at   | NM_080556    | Tm9sf2   | transmembrane 9 superfamily member 2                                               | 1.67 |
| 1452812_at   | NM_181039    | Lphn1    | latrophilin 1                                                                      | 1.67 |
| 1427253_s_at | NM_001163018 | Suz12    | suppressor of zeste 12 homolog (Drosophila)                                        | 1.67 |
| 1433530_at   | NM_018860    | Rpl41    | ribosomal protein L41                                                              | 1.67 |
| 1416605_at   | NM_026631    | Nhp2     | NHP2 ribonucleoprotein homolog (yeast)                                             | 1.67 |
| 1430981_s_at | NM_001122963 | Gbbp1    | GC-rich promoter binding protein 1                                                 | 1.67 |
| 1428105_at   | NM_001141975 | Tpx2     | TPX2, microtubule-associated protein homolog (Xenopus laevis)                      | 1.67 |
| 1448326_a_at | NM_013496    | Crabp1   | cellular retinoic acid binding protein I                                           | 1.67 |
| 1425199_a_at | NM_001113416 | Epb4.1l5 | erythrocyte protein band 4.1-like 5                                                | 1.67 |
| 1433623_at   | NM_175494    | Zfp367   | zinc finger protein 367                                                            | 1.67 |
| 1424156_at   | NM_001139516 | Rbl1     | retinoblastoma-like 1 (p107)                                                       | 1.67 |
| 1419943_s_at | NM_172301    | Ccnb1    | cyclin B1                                                                          | 1.67 |
| 1455951_at   | NM_001003913 | Mars     | methionine-tRNA synthetase                                                         | 1.67 |
| 1416687_at   | NM_001142916 | Plod2    | procollagen lysine, 2-oxoglutarate 5-dioxygenase 2                                 | 1.68 |
| 1416014_at   | NM_015751    | Abce1    | ATP-binding cassette, sub-family E (OABP), member 1                                | 1.68 |
| 1428483_a_at | NM_025642    |          | RIKEN cDNA 2610039C10 gene                                                         | 1.68 |
| 1452158_at   | NM_029735    | Eprs     | glutamyl-prolyl-tRNA synthetase                                                    | 1.68 |
| 1419173_at   | NM_025371    | Acy1     | aminoacylase 1                                                                     | 1.68 |
| 1426366_at   | NM_153178    | Eif2c2   | eukaryotic translation initiation factor 2C, 2                                     | 1.68 |
| 1448612_at   | NM_018754    | Sfn      | stratifin                                                                          | 1.68 |
| 1424436_at   | NM_010256    | Gart     | phosphoribosylglycinamide formyltransferase                                        | 1.68 |
| 1426580_at   | NM_011495    | Plk4     | polo-like kinase 4 (Drosophila)                                                    | 1.68 |
| 1422016_a_at | NM_021886    | Cenph    | centromere protein H                                                               | 1.68 |
| 1420518_a_at | NM_001145800 | Igsf9    | immunoglobulin superfamily, member 9                                               | 1.68 |
| 1429294_at   | NM_027182    | Trip13   | thyroid hormone receptor interactor 13                                             | 1.68 |
| 1417910_at   | NM_009828    | Ccna2    | cyclin A2                                                                          | 1.68 |
| 1426790_at   | NM_001136081 | Ssrp1    | structure specific recognition protein 1                                           | 1.68 |
| 1456197_x_at | NM_001099299 | Ajap1    | Adherens junction associated protein 1                                             | 1.68 |
| 1427126_at   | NM_010478    | Hspa1b   | heat shock protein 1B                                                              | 1.68 |
| 1455988_a_at | NM_009838    | Cct6a    | chaperonin containing Tcp1, subunit 6a (zeta)                                      | 1.68 |
| 1418656_at   | NM_025520    | Lsm5     | LSM5 homolog, U6 small nuclear RNA associated (S. cerevisiae)                      | 1.68 |
| 1419427_at   | NM_009971    | Csf3     | colony stimulating factor 3 (granulocyte)                                          | 1.68 |
| 1448127_at   | NM_009103    | Rrm1     | ribonucleotide reductase M1                                                        | 1.68 |
| 1435504_at   | NM_030179    | Clip4    | CAP-GLY domain containing linker protein family, member 4                          | 1.68 |
| 1454011_a_at | NM_011284    | Rpa2     | replication protein A2                                                             | 1.69 |
| 1429057_at   | NM_025832    | Naa16    | N(alpha)-acetyltransferase 16, NatA auxiliary subunit                              | 1.69 |
| 1427997_at   | NM_026742    | Ndufaf4  | NADH dehydrogenase (ubiquinone) 1 alpha subcomplex, assembly factor 4              | 1.69 |
| 1433680_x_at | NM_001161737 | Siva1    | SIVA1, apoptosis-inducing factor                                                   | 1.69 |

| Probe Set ID | Accession_ID | Gene     | Description                                                                  | Fold |
|--------------|--------------|----------|------------------------------------------------------------------------------|------|
| 1456003_a_at | NM_018861    | Slc1a4   | solute carrier family 1 (glutamate/neutral amino acid transporter), member 4 | 1.69 |
| 1417132_at   | NM_007658    | Cdc25a   | cell division cycle 25 homolog A (S. pombe)                                  | 1.69 |
| 1435989_x_at | NM_031170    | Krt8     | keratin 8                                                                    | 1.69 |
| 1448780_at   | NM_009194    | Slc12a2  | solute carrier family 12, member 2                                           | 1.69 |
| 1455299_at   | NM_028572    | Vgll3    | vestigial like 3 (Drosophila)                                                | 1.69 |
| 1436574_at   | NM_027285    |          | RIKEN cDNA 1700029101 gene                                                   | 1.69 |
| 1442454_at   | NM_011623    | Top2a    | topoisomerase (DNA) II alpha                                                 | 1.69 |
| 1435936_at   | NM_001004148 | Slc13a5  | solute carrier family 13 (sodium-dependent citrate transporter), member 5    | 1.69 |
| 1460353_at   | NM_028355    | Tmem48   | transmembrane protein 48                                                     | 1.69 |
| 1424858_at   | NM_145443    | L2hgdh   | L-2-hydroxyglutarate dehydrogenase                                           | 1.69 |
| 1418825_at   | NM_008326    | Irgm1    | immunity-related GTPase family M member 1                                    | 1.70 |
| 1450886_at   | NM_010353    | Gsg2     | germ cell-specific gene 2                                                    | 1.70 |
| 1460391_at   | NM_025942    | Ola1     | Obg-like ATPase 1                                                            | 1.70 |
| 1438116_x_at | NM_012030    | Slc9a3r1 | solute carrier family 9 (sodium/hydrogen exchanger), member 3 regulator 1    | 1.70 |
| 1454664_a_at | NM_173363    | Eif5     | eukaryotic translation initiation factor 5                                   | 1.70 |
| 1427837_at   | U25103       | Igk-V32  | Immunoglobulin kappa chain variable 32 (V32)                                 | 1.70 |
| 1426854_a_at | NM_023871    | Set      | SET nuclear oncogene                                                         | 1.70 |
| 1434700_at   | NM_001015099 | G2e3     | G2/M-phase specific E3 ubiquitin ligase                                      | 1.70 |
| 1460684_at   | NM_028454    | Tm7sf2   | transmembrane 7 superfamily member 2                                         | 1.70 |
| 1426147_s_at | NM_001160096 | Cldn10   | claudin 10                                                                   | 1.70 |
| 1424794_at   | NM_025786    | Rnf186   | ring finger protein 186                                                      | 1.70 |
| 1443964_at   | NM_146260    | Tmie     | transmembrane inner ear                                                      | 1.70 |
| 1418030_at   | NM_001038643 | Slco3a1  | solute carrier organic anion transporter family, member 3a1                  | 1.70 |
| 1434940_x_at | NM_026446    | Rgs19    | regulator of G-protein signaling 19                                          | 1.70 |
| 1450448_at   | NM_009285    | Stc1     | stanniocalcin 1                                                              | 1.70 |
| 1428837_at   | NM_001081403 | Klhl14   | kelch-like 14 (Drosophila)                                                   | 1.70 |
| 1437466_at   | NM_009655    | Alcam    | activated leukocyte cell adhesion molecule                                   | 1.71 |
| 1437164_x_at | NM_138597    | Atp5o    | ATP synthase, H+ transporting, mitochondrial F1 complex, O subunit           | 1.71 |
| 1438945_x_at | NM_010288    | Gja1     | gap junction protein, alpha 1                                                | 1.71 |
| 1417957_a_at | NM_133681    | Tspan1   | tetraspanin 1                                                                | 1.71 |
| 1417994_a_at | NM_001034013 | Accn1    | amiloride-sensitive cation channel 1, neuronal (degenerin)                   | 1.71 |
| 1434643_at   | NM_020601    | Tbl1x    | transducin (beta)-like 1 X-linked                                            | 1.71 |
| 1441429_at   | NM_010572    | Irs4     | insulin receptor substrate 4                                                 | 1.71 |
| 1435308_at   | NM_010243    | Fut9     | fucosyltransferase 9                                                         | 1.71 |
| 1419662_at   | NM_008760    | Ogn      | osteoglycin                                                                  | 1.71 |
| 1419397_at   | NM_008892    | Pola1    | polymerase (DNA directed), alpha 1                                           | 1.71 |
| 1426300_at   | NM_009655    | Alcam    | activated leukocyte cell adhesion molecule                                   | 1.71 |
| 1437638_at   | NM_175229    | Srrm2    | serine/arginine repetitive matrix 2                                          | 1.71 |
| 1460092_at   | BB082567     | ---      |                                                                              | 1.71 |
| 1436707_x_at | NM_144818    | Ncaph    | non-SMC condensin I complex, subunit H                                       | 1.71 |
| 1426081_a_at | NM_010050    | Dio2     | deiodinase, iodothyronine, type II                                           | 1.71 |
| 1426485_at   | NM_026390    | Ubxn4    | UBX domain protein 4                                                         | 1.71 |
| 1447100_s_at | NM_027482    |          | RIKEN cDNA 5730508B09 gene                                                   | 1.71 |
| 1415811_at   | NM_001111078 | Uhrf1    | ubiquitin-like, containing PHD and RING finger domains, 1                    | 1.71 |
| 1454688_x_at | NM_026775    | Tmed10   | transmembrane emp24-like trafficking protein 10 (yeast)                      | 1.71 |
| 1435452_at   | NM_175507    | Tmem20   | transmembrane protein 20                                                     | 1.71 |
| 1416346_at   | NM_013898    | Timm8a1  | translocase of inner mitochondrial membrane 8 homolog a1 (yeast)             | 1.71 |
| 1417947_at   | NM_011045    | Pcna     | proliferating cell nuclear antigen                                           | 1.72 |
| 1424300_at   | NM_026053    | Gemin6   | gem (nuclear organelle) associated protein 6                                 | 1.72 |
| 1450496_a_at | NM_001164355 | Ska1     | spindle and kinetochore associated complex subunit 1                         | 1.72 |

| Probe Set ID | Accession_ID | Gene     | Description                                                                                       | Fold |
|--------------|--------------|----------|---------------------------------------------------------------------------------------------------|------|
| 1418818_at   | NM_009701    | Aqp5     | aquaporin 5                                                                                       | 1.72 |
| 1423241_a_at | NM_009361    | Tfdp1    | transcription factor Dp 1                                                                         | 1.72 |
| 1448507_at   | NM_028889    | Efhd1    | EF hand domain containing 1                                                                       | 1.72 |
| 1439065_x_at | NM_001039209 | Gm13152  | predicted gene 13152                                                                              | 1.72 |
| 1418488_s_at | NM_023663    | Ripk4    | receptor-interacting serine-threonine kinase 4                                                    | 1.72 |
| 1449009_at   | NM_001145164 |          | T-cell specific GTPase 1                                                                          | 1.72 |
| 1460049_s_at | NM_024283    |          | RIKEN cDNA 1500015O10 gene                                                                        | 1.72 |
| 1419639_at   | NM_010111    | Efnb2    | ephrin B2                                                                                         | 1.72 |
| 1438018_at   | NM_030014    | Hook1    | hook homolog 1 (Drosophila)                                                                       | 1.72 |
| 1418018_at   | NM_007754    | Cpd      | carboxypeptidase D                                                                                | 1.72 |
| 1425272_at   | NM_007929    | Emp2     | epithelial membrane protein 2                                                                     | 1.72 |
| 1429436_at   | NM_018785    | Prpf40a  | PRP40 pre-mRNA processing factor 40 homolog A (yeast)                                             | 1.72 |
| 1448191_at   | NM_011121    | Plk1     | polo-like kinase 1 (Drosophila)                                                                   | 1.72 |
| 1441910_x_at | NM_007633    | Ccne1    | cyclin E1                                                                                         | 1.72 |
| 1417394_at   | NM_010637    | Klf4     | Kruppel-like factor 4 (gut)                                                                       | 1.72 |
| 1416568_a_at | NM_001085472 | Acin1    | apoptotic chromatin condensation inducer 1                                                        | 1.72 |
| 1448277_at   | NM_008894    | Pold2    | polymerase (DNA directed), delta 2, regulatory subunit                                            | 1.73 |
| 1456054_a_at | NM_001159603 | Pum1     | pumilio 1 (Drosophila)                                                                            | 1.73 |
| 1420008_s_at | NM_170779    | Wwc1     | WW, C2 and coiled-coil domain containing 1                                                        | 1.73 |
| 1459894_at   | NM_027711    | Iqgap2   | IQ motif containing GTPase activating protein 2                                                   | 1.73 |
| 1452902_at   | NM_183286    | Dhrs13   | dehydrogenase/reductase (SDR family) member 13                                                    | 1.73 |
| 1433683_at   | NM_176838    | Esrp2    | epithelial splicing regulatory protein 2                                                          | 1.73 |
| 1452397_at   | NM_026054    |          | RIKEN cDNA 2810474O19 gene                                                                        | 1.73 |
| 1435155_at   | NM_001037711 | Cgn      | cingulin                                                                                          | 1.73 |
| 1456698_s_at | NM_016690    | Hnrpd1   | heterogeneous nuclear ribonucleoprotein D-like                                                    | 1.73 |
| 1417867_at   | NM_013459    | Cfd      | complement factor D (adipsin)                                                                     | 1.73 |
| 1429520_a_at | NM_025408    | Acer3    | alkaline ceramidase 3                                                                             | 1.73 |
| 1451967_x_at | NM_008379    | Kpnb1    | karyopherin (importin) beta 1                                                                     | 1.73 |
| 1423381_at   | NM_027582    |          | RIKEN cDNA 4921521F21 gene                                                                        | 1.74 |
| 1419254_at   | NM_008638    | Mthfd2   | methylenetetrahydrofolate dehydrogenase (NAD+ dependent), methenyltetrahydrofolate cyclohydrolase | 1.74 |
| 1423775_s_at | NM_145150    | Prc1     | protein regulator of cytokinesis 1                                                                | 1.74 |
| 1457281_at   | NM_030046    | Dnajc21  | DnaJ (Hsp40) homolog, subfamily C, member 21                                                      | 1.74 |
| 1420937_at   | NM_016856    | Cpsf2    | cleavage and polyadenylation specific factor 2                                                    | 1.74 |
| 1426118_a_at | NM_001109748 | Tomm40   | translocase of outer mitochondrial membrane 40 homolog (yeast)                                    | 1.74 |
| 1440635_at   | NM_001081390 | Palld    | palladin, cytoskeletal associated protein                                                         | 1.74 |
| 1438902_a_at | NM_010480    | Hsp90aa1 | heat shock protein 90, alpha (cytosolic), class A member 1                                        | 1.74 |
| 1452598_at   | NM_001163476 | Gins1    | GIN5 complex subunit 1 (Psf1 homolog)                                                             | 1.74 |
| 1418203_at   | NM_021451    | Pmaip1   | phorbol-12-myristate-13-acetate-induced protein 1                                                 | 1.75 |
| 1434239_at   | NM_199447    | Rrp12    | ribosomal RNA processing 12 homolog (S. cerevisiae)                                               | 1.75 |
| 1430982_at   | NM_001078167 | Srsf1    | serine/arginine-rich splicing factor 1                                                            | 1.75 |
| 1448595_a_at | NM_009052    | Bex1     | brain expressed gene 1                                                                            | 1.75 |
| 1425993_a_at | NM_013559    | Hsph1    | heat shock 105kDa/110kDa protein 1                                                                | 1.75 |
| 1431609_a_at | NM_001102404 | Acp5     | acid phosphatase 5, tartrate resistant                                                            | 1.75 |
| 1455771_at   | NM_172449    | Bzrap1   | benzodiazapine receptor associated protein 1                                                      | 1.75 |
| 1428480_at   | NM_026560    | Cdca8    | cell division cycle associated 8                                                                  | 1.75 |
| 1418760_at   | NM_021557    | Rdh11    | retinol dehydrogenase 11                                                                          | 1.75 |
| 1452318_a_at | NM_010478    | Hspa1b   | heat shock protein 1B                                                                             | 1.75 |
| 1417144_at   | NM_134024    | Tubg1    | tubulin, gamma 1                                                                                  | 1.75 |
| 1436600_at   | NM_172913    | Tox3     | TOX high mobility group box family member 3                                                       | 1.75 |
| 1439526_at   | AV375160     |          |                                                                                                   | 1.75 |
| 1454671_at   | NM_153526    | Insig1   | insulin induced gene 1                                                                            | 1.76 |
| 1418430_at   | NM_008448    | Kif5b    | kinesin family member 5B                                                                          | 1.76 |

| Probe Set ID | Accession_ID | Gene     | Description                                                                                                                         | Fold |
|--------------|--------------|----------|-------------------------------------------------------------------------------------------------------------------------------------|------|
| 1455832_a_at | NM_009471    | Umps     | uridine monophosphate synthetase                                                                                                    | 1.76 |
| 1452115_a_at | NM_011495    | Plk4     | polo-like kinase 4 (Drosophila)                                                                                                     | 1.76 |
| 1443733_x_at | NM_133692    | Pold3    | polymerase (DNA-directed), delta 3, accessory subunit                                                                               | 1.76 |
| 1455818_at   | NM_134041    |          | RIKEN cDNA 4930427A07 gene                                                                                                          | 1.76 |
| 1423809_at   | NM_001163763 | Tcf19    | transcription factor 19                                                                                                             | 1.76 |
| 1434291_a_at | NM_011353    | Serf1    | small EDRK-rich factor 1                                                                                                            | 1.76 |
| 1420647_a_at | NM_031170    | Krt8     | keratin 8                                                                                                                           | 1.76 |
| 1423691_x_at | NM_031170    | Krt8     | keratin 8                                                                                                                           | 1.77 |
| 1416632_at   | NM_008615    | Me1      | malic enzyme 1, NADP(+)-dependent, cytosolic                                                                                        | 1.77 |
| 1449799_s_at | NM_026163    | Pkp2     | plakophilin 2                                                                                                                       | 1.77 |
| 1434605_at   | NM_198303    | Eif5b    | eukaryotic translation initiation factor 5B                                                                                         | 1.77 |
| 1428333_at   | NM_029823    |          | RIKEN cDNA 2900062L11 gene                                                                                                          | 1.77 |
| 1416336_s_at | NM_009226    | Snrpd1   | small nuclear ribonucleoprotein D1                                                                                                  | 1.77 |
| 1449061_a_at | NM_008921    | Prim1    | DNA primase, p49 subunit                                                                                                            | 1.77 |
| 1460193_at   | NM_133726    | St13     | suppression of tumorigenicity 13                                                                                                    | 1.77 |
| 1448820_a_at | NM_026030    | Eif2s2   | eukaryotic translation initiation factor 2, subunit 2 (beta)                                                                        | 1.77 |
| 1421546_a_at | NM_012025    | Racgap1  | Rac GTPase-activating protein 1                                                                                                     | 1.77 |
| 1445186_at   | NM_011491    | Stc2     | stanniocalcin 2                                                                                                                     | 1.77 |
| 1420917_at   | NM_018785    | Prpf40a  | PRP40 pre-mRNA processing factor 40 homolog A (yeast)                                                                               | 1.77 |
| 1439270_x_at | NM_009391    | Ran      | RAN, member RAS oncogene family                                                                                                     | 1.77 |
| 1421912_at   | NM_011397    | Slc23a1  | solute carrier family 23 (nucleobase transporters), member 1                                                                        | 1.77 |
| 1439415_x_at | NM_025587    | Rps21    | ribosomal protein S21                                                                                                               | 1.77 |
| 1437552_at   | NM_026120    |          | RIKEN cDNA 2410127L17 gene                                                                                                          | 1.77 |
| 1418105_at   | NM_019675    | Stmn4    | stathmin-like 4                                                                                                                     | 1.77 |
| 1452583_s_at | NM_176963    | Galm     | galactose mutarotase                                                                                                                | 1.77 |
| 1415917_at   | NM_138745    | Mthfd1   | methylenetetrahydrofolate dehydrogenase (NADP+ dependent), methenyltetrahydrofolate cyclohydrolase, formyltetrahydrofolate synthase | 1.77 |
| 1416166_a_at | NM_016764    | Prdx4    | peroxiredoxin 4                                                                                                                     | 1.77 |
| 1437186_at   | NM_201364    | BC055324 | cDNA sequence BC055324                                                                                                              | 1.77 |
| 1417398_at   | NM_025846    | Rras2    | related RAS viral (r-ras) oncogene homolog 2                                                                                        | 1.77 |
| 1424143_a_at | NM_026014    | Cdt1     | chromatin licensing and DNA replication factor 1                                                                                    | 1.78 |
| 1449042_at   | NM_181322    | Ctcf     | CCCTC-binding factor                                                                                                                | 1.78 |
| 1416235_at   | NM_133807    | Lrrc59   | leucine rich repeat containing 59                                                                                                   | 1.78 |
| 1418025_at   | NM_011498    | Bhlhe40  | basic helix-loop-helix family, member e40                                                                                           | 1.78 |
| 1452298_a_at | NM_201600    | Myo5b    | myosin VB                                                                                                                           | 1.78 |
| 1420843_at   | NM_011213    | Ptpnf    | protein tyrosine phosphatase, receptor type, F                                                                                      | 1.78 |
| 1416222_at   | NM_010941    | Nsdhl    | NAD(P) dependent steroid dehydrogenase-like                                                                                         | 1.78 |
| 1417926_at   | NM_133762    | Ncapg2   | non-SMC condensin II complex, subunit G2                                                                                            | 1.78 |
| 1447166_at   | AI891479     |          |                                                                                                                                     | 1.78 |
| 1433862_at   | NM_001014976 | Espl1    | extra spindle poles-like 1 (S. cerevisiae)                                                                                          | 1.78 |
| 1426645_at   | NM_010480    | Hsp90aa1 | heat shock protein 90, alpha (cytosolic), class A member 1                                                                          | 1.78 |
| 1451346_at   | NM_024433    | Mtap     | methylthioadenosine phosphorylase                                                                                                   | 1.79 |
| 1445499_at   | NM_026083    | Zc3h13   | zinc finger CCCH type containing 13                                                                                                 | 1.79 |
| 1418469_at   | NM_173440    | Nrip1    | nuclear receptor interacting protein 1                                                                                              | 1.79 |
| 1460081_at   | NM_018801    | Syt7     | synaptotagmin VII                                                                                                                   | 1.79 |
| 1429270_a_at | NM_001168244 | Syce2    | synaptonemal complex central element protein 2                                                                                      | 1.79 |
| 1417131_at   | NM_007658    | Cdc25a   | cell division cycle 25 homolog A (S. pombe)                                                                                         | 1.79 |
| 1455724_at   | NM_001164275 | Prrg1    | proline rich Gla (G-carboxyglutamic acid) 1                                                                                         | 1.79 |
| 1446957_s_at | NM_030563    | N4bp1    | NEDD4 binding protein 1                                                                                                             | 1.79 |
| 1426569_a_at | NM_001159544 | Frk      | fyn-related kinase                                                                                                                  | 1.79 |
| 1423525_at   | NM_025979    | Mastl    | microtubule associated serine/threonine kinase-like                                                                                 | 1.79 |
| 1448673_at   | NM_021495    | Pvrl3    | poliovirus receptor-related 3                                                                                                       | 1.79 |

| Probe Set ID | Accession_ID | Gene      | Description                                                             | Fold |
|--------------|--------------|-----------|-------------------------------------------------------------------------|------|
| 1437780_at   | NM_001146081 | Fancc     | Fanconi anemia, complementation group B                                 | 1.79 |
| 1449207_a_at | NM_001166406 | Kif20a    | kinesin family member 20A                                               | 1.79 |
| 1435368_a_at | NM_007415    | Parp1     | poly (ADP-ribose) polymerase family, member 1                           | 1.80 |
| 1438487_s_at | NM_001080755 | Zzz3      | zinc finger, ZZ domain containing 3                                     | 1.80 |
| 1452713_a_at | NM_025645    | Snrnp40   | small nuclear ribonucleoprotein 40 (U5)                                 | 1.80 |
| 1449863_a_at | NM_010056    | Dlx5      | distal-less homeobox 5                                                  | 1.80 |
| 1432016_a_at | NM_029573    | Idh3a     | isocitrate dehydrogenase 3 (NAD+) alpha                                 | 1.80 |
| 1423569_at   | NM_025961    | Gatm      | glycine amidinotransferase (L-arginine:glycine amidinotransferase)      | 1.80 |
| 1448182_a_at | NM_009846    | Cd24a     | CD24a antigen                                                           | 1.80 |
| 1424511_at   | NM_011497    | Aurka     | aurora kinase A                                                         | 1.80 |
| 1433813_at   | NM_028355    | Tmem48    | transmembrane protein 48                                                | 1.80 |
| 1452378_at   | NR_002847    | Malat1    | metastasis associated lung adenocarcinoma transcript 1 (non-coding RNA) | 1.80 |
| 1444112_at   | XR_104848    | Gm15417   | predicted gene 15417                                                    | 1.80 |
| 1448640_at   | NM_001171010 | Slc14a1   | solute carrier family 14 (urea transporter), member 1                   | 1.80 |
| 1424652_at   | NM_145570    | Fam176a   | family with sequence similarity 176, member A                           | 1.80 |
| 1420985_at   | NM_138679    | Ash1l     | ash1 (absent, small, or homeotic)-like (Drosophila)                     | 1.81 |
| 1421262_at   | NM_010720    | Lipg      | lipase, endothelial                                                     | 1.81 |
| 1452118_at   | NM_001163734 | Rrp1b     | ribosomal RNA processing 1 homolog B (S. cerevisiae)                    | 1.81 |
| 1423060_at   | NM_011119    | Pa2g4     | proliferation-associated 2G4                                            | 1.81 |
| 1418216_at   | NM_011820    | Ggt5      | gamma-glutamyltransferase 5                                             | 1.81 |
| 1443736_at   | BG868839     | Gm13648   | predicted gene 13648                                                    | 1.81 |
| 1456120_at   | NM_177608    | Secisbp2l | SECIS binding protein 2-like                                            | 1.81 |
| 1424110_a_at | NM_008704    | Nme1      | non-metastatic cells 1, protein (NM23A) expressed in                    | 1.81 |
| 1423774_a_at | NM_145150    | Prc1      | protein regulator of cytokinesis 1                                      | 1.81 |
| 1417403_at   | NM_130450    | Elovl6    | ELOVL family member 6, elongation of long chain fatty acids (yeast)     | 1.81 |
| 1427090_at   | NM_181412    | Zbed4     | zinc finger, BED domain containing 4                                    | 1.82 |
| 1429171_a_at | NM_019438    | Ncapg     | non-SMC condensin I complex, subunit G                                  | 1.82 |
| 1438697_at   | NM_175432    | Tmem132c  | transmembrane protein 132C                                              | 1.82 |
| 1427257_at   | NM_001081249 | Vcan      | versican                                                                | 1.82 |
| 1449476_at   | NM_011973    | Stk30     | serine/threonine kinase 30                                              | 1.82 |
| 1416468_at   | NM_013467    | Aldh1a1   | aldehyde dehydrogenase family 1, subfamily A1                           | 1.82 |
| 1429239_a_at | NM_133774    | Stard4    | StAR-related lipid transfer (START) domain containing 4                 | 1.82 |
| 1418189_s_at | NR_002847    | Malat1    | metastasis associated lung adenocarcinoma transcript 1 (non-coding RNA) | 1.82 |
| 1418188_a_at | NR_002847    | Malat1    | metastasis associated lung adenocarcinoma transcript 1 (non-coding RNA) | 1.82 |
| 1448205_at   | NM_172301    | Ccnb1     | cyclin B1                                                               | 1.82 |
| 1452907_at   | NM_008079    | Galc      | galactosylceramidase                                                    | 1.82 |
| 1452241_at   | NM_176979    | Topbp1    | topoisomerase (DNA) II binding protein 1                                | 1.82 |
| 1431293_a_at | NM_171826    | Cldnd1    | claudin domain containing 1                                             | 1.82 |
| 1438556_a_at | NM_016963    | Tmod3     | tropomodulin 3                                                          | 1.82 |
| 1419555_at   | NM_001145813 | Elf5      | E74-like factor 5                                                       | 1.82 |
| 1422462_at   | NM_026024    | Ube2t     | ubiquitin-conjugating enzyme E2T (putative)                             | 1.82 |
| 1438403_s_at | NR_002847    | Malat1    | metastasis associated lung adenocarcinoma transcript 1 (non-coding RNA) | 1.83 |
| 1454658_at   | NM_173751    | Ilvbl     | ilvB (bacterial acetolactate synthase)-like                             | 1.83 |
| 1452314_at   | NM_010615    | Kif11     | kinesin family member 11                                                | 1.83 |
| 1428061_at   | NM_026115    | Hat1      | histone aminotransferase 1                                              | 1.83 |
| 1426327_s_at | NM_053009    |           | ciliary neurotrophic factor                                             | 1.83 |
| 1449877_s_at | NM_001195298 | Kifc1     | kinesin family member C1                                                | 1.83 |
| 1454904_at   | NM_001164190 | Mtm1      | X-linked myotubular myopathy gene 1                                     | 1.83 |
| 1424966_at   | NM_001168256 | Tmem40    | transmembrane protein 40                                                | 1.83 |

| Probe Set ID | Accession_ID | Gene     | Description                                                        | Fold |
|--------------|--------------|----------|--------------------------------------------------------------------|------|
| 1416858_a_at | NM_013902    | Fkbp3    | FK506 binding protein 3                                            | 1.83 |
| 1451424_at   | NM_146017    | Gabrp    | gamma-aminobutyric acid (GABA) A receptor, pi                      | 1.83 |
| 1453128_at   | NM_053247    | Lyve1    | lymphatic vessel endothelial hyaluronan receptor 1                 | 1.83 |
| 1439016_x_at | NM_001164787 |          | small proline-rich protein 2A1                                     | 1.83 |
| 1456542_s_at | NM_001081054 | Qrs1     | glutamyl-tRNA synthase (glutamine-hydrolyzing)-like 1              | 1.83 |
| 1437467_at   | NM_009655    | Alcam    | activated leukocyte cell adhesion molecule                         | 1.83 |
| 1455528_at   | AI315686     |          |                                                                    | 1.83 |
| 1421955_a_at | NM_010890    | Nedd4    | neural precursor cell expressed, developmentally down-regulated 4  | 1.83 |
| 1426047_a_at | NM_001161838 | Ptprr    | protein tyrosine phosphatase, receptor type, R                     | 1.83 |
| 1433866_x_at | NM_011034    | Prdx1    | peroxiredoxin 1                                                    | 1.84 |
| 1447927_at   | NM_001039646 |          | guanylate-binding protein 10 /// macrophage activation 2 like      | 1.84 |
| 1453796_a_at | NM_026168    | Ergic2   | ERGIC and golgi 2                                                  | 1.84 |
| 1422484_at   | NM_007808    | Cycc     | cytochrome c, somatic                                              | 1.84 |
| 1417057_a_at | NM_026352    |          | lysosomal-associated membrane protein 3                            | 1.84 |
| 1417689_a_at | NM_001164557 | Pdzk1ip1 | PDZK1 interacting protein 1                                        | 1.84 |
| 1452414_s_at | NM_023731    | Ccdc86   | coiled-coil domain containing 86                                   | 1.84 |
| 1424971_at   | NM_027411    | Ccdc99   | coiled-coil domain containing 99                                   | 1.84 |
| 1418715_at   | NM_001114339 | Pank1    | pantothenate kinase 1                                              | 1.84 |
| 1423601_s_at | NM_011552    | Tcof1    | Treacher Collins Franceschetti syndrome 1, homolog                 | 1.85 |
| 1451481_s_at | NM_145932    | Osta     | organic solute transporter alpha                                   | 1.85 |
| 1455959_s_at | NM_010295    | Gclc     | glutamate-cysteine ligase, catalytic subunit                       | 1.85 |
| 1451667_at   | NM_145413    | Fam20b   | family with sequence similarity 20, member B                       | 1.85 |
| 1435082_at   | NM_013635    | Sypl     | synaptophysin-like protein                                         | 1.85 |
| 1439040_at   | NM_173762    | Cenpe    | centromere protein E                                               | 1.85 |
| 1427893_a_at | NM_026784    | Pmvk     | phosphomevalonate kinase                                           | 1.85 |
| 1429379_at   | NM_053247    | Lyve1    | lymphatic vessel endothelial hyaluronan receptor 1                 | 1.85 |
| 1429240_at   | NM_133774    | Stard4   | StAR-related lipid transfer (START) domain containing 4            | 1.85 |
| 1426744_at   | NM_033218    | Srebf2   | sterol regulatory element binding factor 2                         | 1.85 |
| 1457867_at   | NM_001004173 | Sgpp2    | sphingosine-1-phosphate phosphatase 2                              | 1.85 |
| 1420622_a_at | NM_031165    | Hspa8    | heat shock protein 8                                               | 1.85 |
| 1435181_at   | NM_001115010 | Lin54    | lin-54 homolog (C. elegans)                                        | 1.85 |
| 1457913_at   | NM_001082485 |          | RIKEN cDNA 5730601F06 gene                                         | 1.85 |
| 1452047_at   | NM_009786    | Cacybp   | calcyclin binding protein                                          | 1.85 |
| 1436390_a_at | NM_001177770 | Clcc1    | chloride channel CLIC-like 1                                       | 1.86 |
| 1448441_at   | NM_016904    | Cks1b    | CDC28 protein kinase 1b                                            | 1.86 |
| 1418527_a_at | NM_001080387 | Srsf10   | serine/arginine-rich splicing factor 10                            | 1.86 |
| 1448885_at   | NM_028712    | Rap2b    | RAP2B, member of RAS oncogene family                               | 1.86 |
| 1417028_a_at | NM_030706    | Trim2    | tripartite motif-containing 2                                      | 1.86 |
| 1448844_at   | NM_025558    | Cyb5b    | cytochrome b5 type B                                               | 1.86 |
| 1454952_s_at | NM_178113    | Ncapd3   | non-SMC condensin II complex, subunit D3                           | 1.86 |
| 1423092_at   | NM_016692    | Incnp    | inner centromere protein                                           | 1.86 |
| 1440785_at   | NM_212452    | Rxfp1    | relaxin/insulin-like family peptide receptor 1                     | 1.86 |
| 1451033_a_at | NM_016984    | Trpc4    | transient receptor potential cation channel, subfamily C, member 4 | 1.86 |
| 1437327_x_at | NM_001163035 | Enoph1   | enolase-phosphatase 1                                              | 1.86 |
| 1429024_at   | NM_001170847 | Rbm20    | RNA binding motif protein 20                                       | 1.86 |
| 1421694_a_at | NM_001081249 | Vcan     | versican                                                           | 1.86 |
| 1448551_a_at | NM_030706    | Trim2    | tripartite motif-containing 2                                      | 1.86 |
| 1427275_at   | NM_133786    | Smc4     | structural maintenance of chromosomes 4                            | 1.86 |
| 1416059_at   | NM_019787    | Sec23b   | SEC23B (S. cerevisiae)                                             | 1.86 |
| 1456071_a_at | NM_007808    | Cycc     | cytochrome c, somatic                                              | 1.86 |
| 1417351_a_at | NM_021336    | Snrpa1   | small nuclear ribonucleoprotein polypeptide A'                     | 1.87 |
| 1449699_s_at | NM_172616    |          | RIKEN cDNA C330027C09 gene                                         | 1.87 |



| Probe Set ID | Accession_ID | Gene      | Description                                                                                 | Fold |
|--------------|--------------|-----------|---------------------------------------------------------------------------------------------|------|
| 1449167_at   | NM_013512    | Epb4.114a | erythrocyte protein band 4.1-like 4a                                                        | 1.87 |
| 1439753_x_at | NM_011382    | Six4      | sine oculis-related homeobox 4 homolog (Drosophila)                                         | 1.87 |
| 1416041_at   | NM_001161845 | Sgk1      | serum/glucocorticoid regulated kinase 1                                                     | 1.87 |
| 1430811_a_at | NM_023284    | Nuf2      | NUF2, NDC80 kinetochore complex component, homolog (S. cerevisiae)                          | 1.87 |
| 1453684_s_at | NM_026934    | Zc3h15    | zinc finger CCCH-type containing 15                                                         | 1.87 |
| 1452954_at   | NM_026785    | Ube2c     | ubiquitin-conjugating enzyme E2C                                                            | 1.87 |
| 1438567_at   | NM_172840    | Vwa2      | von Willebrand factor A domain containing 2                                                 | 1.87 |
| 1416544_at   | NM_001146689 | Ezh2      | enhancer of zeste homolog 2 (Drosophila)                                                    | 1.87 |
| 1416042_s_at | NM_001081475 | Nasp      | nuclear autoantigenic sperm protein (histone-binding)                                       | 1.87 |
| 1416835_s_at | NM_009665    | Amd1      | S-adenosylmethionine decarboxylase 1                                                        | 1.87 |
| 1436791_at   | NM_009524    | Wnt5a     | wingless-related MMTV integration site 5A                                                   | 1.88 |
| 1428951_at   | NM_001081350 | Nol8      | nucleolar protein 8                                                                         | 1.88 |
| 1448635_at   | NM_008017    | Smc2      | structural maintenance of chromosomes 2                                                     | 1.88 |
| 1437033_a_at | NM_013787    | Skp2      | S-phase kinase-associated protein 2 (p45)                                                   | 1.88 |
| 1419838_s_at | NM_011495    | Plk4      | polo-like kinase 4 (Drosophila)                                                             | 1.88 |
| 1416501_at   | NM_001080773 | Pdpk1     | 3-phosphoinositide dependent protein kinase 1                                               | 1.89 |
| 1427127_x_at | NM_010478    | Hspa1b    | heat shock protein 1B                                                                       | 1.89 |
| 1436981_a_at | NM_011740    |           | tyrosine 3-monooxygenase/tryptophan 5-monooxygenase activation protein, zeta polypeptide    | 1.89 |
| 1416939_at   | NM_026438    | Ppa1      | pyrophosphatase (inorganic) 1                                                               | 1.89 |
| 1433531_at   | NM_001033600 | Acsl4     | acyl-CoA synthetase long-chain family member 4                                              | 1.90 |
| 1434020_at   | NM_001033313 | Pdap1     | PDGFA associated protein 1                                                                  | 1.90 |
| 1448466_at   | NM_026410    | Cdca5     | cell division cycle associated 5                                                            | 1.90 |
| 1454903_at   | NM_033217    | Ngfr      | nerve growth factor receptor (TNFR superfamily, member 16)                                  | 1.90 |
| 1424507_at   | NM_145495    | Rin1      | Ras and Rab interactor 1                                                                    | 1.90 |
| 1416214_at   | NM_008565    | Mcm4      | minichromosome maintenance deficient 4 homolog (S. cerevisiae)                              | 1.90 |
| 1447930_at   | NM_013815    |           | bromodomain adjacent to zinc finger domain 1A                                               | 1.90 |
| 1429658_a_at | NM_008017    | Smc2      | structural maintenance of chromosomes 2                                                     | 1.90 |
| 1416046_a_at | NM_025799    | Fuca2     | fucosidase, alpha-L- 2, plasma                                                              | 1.91 |
| 1449357_at   | NM_025865    |           | RIKEN cDNA 2310030G06 gene                                                                  | 1.91 |
| 1429499_at   | NM_025995    | Fbxo5     | F-box protein 5                                                                             | 1.91 |
| 1424768_at   | NM_145575    | Cald1     | caldesmon 1                                                                                 | 1.91 |
| 1422798_at   | NM_001004357 | Cntnap2   | contactin associated protein-like 2                                                         | 1.91 |
| 1422651_at   | NM_009605    | Adipoq    | adiponectin, C1Q and collagen domain containing                                             | 1.91 |
| 1427231_at   | NM_019413    | Robo1     | roundabout homolog 1 (Drosophila)                                                           | 1.91 |
| 1449855_s_at | NM_016723    |           | ubiquitin carboxyl-terminal esterase L3 (ubiquitin thiolesterase)                           | 1.91 |
| 1448261_at   | NM_009864    | Cdh1      | cadherin 1                                                                                  | 1.91 |
| 1429411_a_at | NM_175009    | Eny2      | enhancer of yellow 2 homolog (Drosophila)                                                   | 1.91 |
| 1424766_at   | NM_146235    | Ercc6l    | excision repair cross-complementing rodent repair deficiency complementation group 6 - like | 1.91 |
| 1452885_at   | NM_028148    | Srsf2ip   | serine/arginine-rich splicing factor 2, interacting protein                                 | 1.91 |
| 1453321_at   | NM_001081416 | Fndc1     | fibronectin type III domain containing 1                                                    | 1.91 |
| 1459299_at   | NM_177376    | Myo3b     | myosin IIIB                                                                                 | 1.92 |
| 1422767_at   | NM_016859    | Bysl      | bystin-like                                                                                 | 1.92 |
| 1458374_at   | NM_172578    | C79407    | expressed sequence C79407                                                                   | 1.92 |
| 1460247_a_at | NM_013787    | Skp2      | S-phase kinase-associated protein 2 (p45)                                                   | 1.92 |
| 1448918_at   | NM_001038643 | Slco3a1   | solute carrier organic anion transporter family, member 3a1                                 | 1.92 |
| 1418969_at   | NM_013787    | Skp2      | S-phase kinase-associated protein 2 (p45)                                                   | 1.92 |
| 1449615_s_at | NM_133808    | Hdlbp     | high density lipoprotein (HDL) binding protein                                              | 1.92 |
| 1453462_at   | NM_027928    | Chst13    | carbohydrate (chondroitin 4) sulfotransferase 13                                            | 1.92 |
| 1450862_at   | NM_001122958 | Rad54l    | RAD54 like (S. cerevisiae)                                                                  | 1.92 |
| 1449140_at   | NM_026023    | Nudcd2    | NudC domain containing 2                                                                    | 1.92 |

| Probe Set ID | Accession_ID | Gene     | Description                                                                                 | Fold |
|--------------|--------------|----------|---------------------------------------------------------------------------------------------|------|
| 1433965_at   | NM_001038999 | Atp8a1   | ATPase, aminophospholipid transporter (APLT), class I, type 8A, member 1                    | 1.92 |
| 1450131_a_at | NM_138653    | Bspry    | B-box and SPRY domain containing                                                            | 1.92 |
| 1456487_at   | NM_009622    | Adcy1    | adenylate cyclase 1                                                                         | 1.92 |
| 1424128_x_at | NM_011496    | Aurkb    | aurora kinase B                                                                             | 1.92 |
| 1452360_a_at | NM_145997    | Kdm5a    | lysine (K)-specific demethylase 5A                                                          | 1.92 |
| 1418026_at   | NM_012012    | Exo1     | exonuclease 1                                                                               | 1.93 |
| 1428892_at   | NM_026845    | Ppil1    | peptidylprolyl isomerase (cyclophilin)-like 1                                               | 1.93 |
| 1438702_at   | NM_201518    | Flrt2    | fibronectin leucine rich transmembrane protein 2                                            | 1.93 |
| 1423544_at   | NM_001163565 | Ptpn5    | protein tyrosine phosphatase, non-receptor type 5                                           | 1.93 |
| 1416698_a_at | NM_016904    | Cks1b    | CDC28 protein kinase 1b                                                                     | 1.93 |
| 1424495_a_at | NM_001037841 | Cklf     | chemokine-like factor                                                                       | 1.93 |
| 1452040_a_at | NM_013538    | Cdca3    | cell division cycle associated 3                                                            | 1.93 |
| 1430139_at   | NM_008234    | Hells    | helicase, lymphoid specific                                                                 | 1.94 |
| 1420683_at   | NM_001168356 | Bnip1    | BCL2/adenovirus E1B 19kD interacting protein like                                           | 1.94 |
| 1448314_at   | NM_007659    | Cdk1     | cyclin-dependent kinase 1                                                                   | 1.94 |
| 1426371_at   | NM_026143    | Far1     | fatty acyl CoA reductase 1                                                                  | 1.94 |
| 1422293_a_at | NM_001142731 | Kctd1    | potassium channel tetramerisation domain containing 1                                       | 1.94 |
| 1419195_at   | NM_001045554 | Wfdc15b  | WAP four-disulfide core domain 15B                                                          | 1.94 |
| 1454799_at   | NM_172715    | Agpat9   | 1-acylglycerol-3-phosphate O-acyltransferase 9                                              | 1.94 |
| 1425544_at   | NM_144920    | Plekha5  | pleckstrin homology domain containing, family A member 5                                    | 1.94 |
| 1433446_at   | NM_145942    | Hmgcs1   | 3-hydroxy-3-methylglutaryl-Coenzyme A synthase 1                                            | 1.94 |
| 1452358_at   | NM_001103367 | Rai2     | retinoic acid induced 2                                                                     | 1.94 |
| 1415860_at   | NM_010655    | Kpna2    | karyopherin (importin) alpha 2                                                              | 1.94 |
| 1455938_x_at | NM_009009    | Rad21    | RAD21 homolog (S. pombe)                                                                    | 1.94 |
| 1455905_at   | NM_001002004 |          | RIKEN cDNA 2610507B11 gene                                                                  | 1.95 |
| 1423194_at   | NM_009706    | Arhgap5  | Rho GTPase activating protein 5                                                             | 1.95 |
| 1455426_at   | NM_010140    | Epha3    | Eph receptor A3                                                                             | 1.95 |
| 1416311_s_at | NM_009446    |          | tubulin, alpha 3A /// tubulin, alpha 3B                                                     | 1.95 |
| 1456102_a_at | NM_001161618 | Cul5     | cullin 5                                                                                    | 1.95 |
| 1456280_at   | NM_175554    | Clspn    | claspin homolog (Xenopus laevis)                                                            | 1.95 |
| 1439012_a_at | NM_007832    | Dck      | deoxycytidine kinase                                                                        | 1.95 |
| 1418856_a_at | NM_016925    | Fanca    | Fanconi anemia, complementation group A                                                     | 1.95 |
| 1418334_at   | NM_001190717 | Dbf4     | DBF4 homolog (S. cerevisiae)                                                                | 1.95 |
| 1419270_a_at | NM_001159646 | Dut      | deoxyuridine triphosphatase                                                                 | 1.95 |
| 1455477_s_at | NM_001164557 | Pdzk1ip1 | PDZK1 interacting protein 1                                                                 | 1.95 |
| 1436000_a_at | NM_013787    | Skp2     | S-phase kinase-associated protein 2 (p45)                                                   | 1.95 |
| 1452291_at   | NM_178407    | Arap2    | ArfGAP with RhoGAP domain, ankyrin repeat and PH domain 2                                   | 1.95 |
| 1416021_a_at | NM_010634    |          | fatty acid binding protein 5, epidermal /// predicted gene 3601                             | 1.95 |
| 1418320_at   | NM_133351    | Prss8    | protease, serine, 8 (prostasin)                                                             | 1.95 |
| 1416575_at   | NM_001161623 | Cdc45    | cell division cycle 45 homolog (S. cerevisiae)                                              | 1.95 |
| 1423566_a_at | NM_013559    | Hsph1    | heat shock 105kDa/110kDa protein 1                                                          | 1.95 |
| 1428593_at   | NM_029368    |          | RIKEN cDNA 1700029F09 gene                                                                  | 1.95 |
| 1448270_at   | NM_019553    | Ddx21    | DEAD (Asp-Glu-Ala-Asp) box polypeptide 21                                                   | 1.95 |
| 1439341_at   | NM_001083628 | Greb1l   | growth regulation by estrogen in breast cancer-like                                         | 1.95 |
| 1455035_s_at | NM_024193    | Nop56    | NOP56 ribonucleoprotein homolog (yeast)                                                     | 1.96 |
| 1456032_x_at | NM_016750    |          | H2A histone family, member Z                                                                | 1.96 |
| 1433696_at   | NM_198937    | Hn1l     | hematological and neurological expressed 1-like                                             | 1.96 |
| 1438922_x_at | NM_007451    | Slc25a5  | solute carrier family 25 (mitochondrial carrier, adenine nucleotide translocator), member 5 | 1.96 |
| 1436218_at   | NM_001033409 | Lgr6     | leucine-rich repeat-containing G protein-coupled receptor 6                                 | 1.96 |
| 1424598_at   | NM_001110826 | Ddx6     | DEAD (Asp-Glu-Ala-Asp) box polypeptide 6                                                    | 1.96 |
| 1437711_x_at | NM_013614    | Odc1     | ornithine decarboxylase, structural 1                                                       | 1.96 |

| Probe Set ID | Accession_ID | Gene    | Description                                                                                       | Fold |
|--------------|--------------|---------|---------------------------------------------------------------------------------------------------|------|
| 1419820_at   | NM_153179    | Pkhd1   | polycystic kidney and hepatic disease 1                                                           | 1.96 |
| 1429664_at   | NM_183294    | Cdk1    | cyclin-dependent kinase-like 1 (CDC2-related kinase)                                              | 1.96 |
| 1416251_at   | NM_008567    | Mcm6    | minichromosome maintenance deficient 6 (MIS5 homolog, <i>S. pombe</i> ) ( <i>S. cerevisiae</i> )  | 1.96 |
| 1457040_at   | NM_144945    | Lgi2    | leucine-rich repeat LGI family, member 2                                                          | 1.97 |
| 1423635_at   | NM_007553    | Bmp2    | bone morphogenetic protein 2                                                                      | 1.97 |
| 1455851_at   | NM_007555    | Bmp5    | bone morphogenetic protein 5                                                                      | 1.97 |
| 1417156_at   | NM_008471    | Krt19   | keratin 19                                                                                        | 1.97 |
| 1452532_x_at | NM_001039185 | Ceacam1 | carcinoembryonic antigen-related cell adhesion molecule 1                                         | 1.97 |
| 1438069_a_at | NM_148930    | Rbm5    | RNA binding motif protein 5                                                                       | 1.97 |
| 1416122_at   | NM_009829    | Ccnd2   | cyclin D2                                                                                         | 1.97 |
| 1423417_at   | NM_009211    | Smarcc1 | SWI/SNF related, matrix associated, actin dependent regulator of chromatin, subfamily c, member 1 | 1.97 |
| 1438015_at   | NM_001030307 | Dkc1    | dyskeratosis congenita 1, dyskerin homolog (human)                                                | 1.98 |
| 1455099_at   | NM_177448    | Mogat2  | monoacylglycerol O-acyltransferase 2                                                              | 1.98 |
| 1456088_at   | NM_009688    | Xiap    | X-linked inhibitor of apoptosis                                                                   | 1.98 |
| 1452917_at   | NM_028128    | Rfc5    | replication factor C (activator 1) 5                                                              | 1.98 |
| 1432538_a_at | NM_027009    | Rfc3    | replication factor C (activator 1) 3                                                              | 1.98 |
| 1452534_a_at | NM_008252    | Hmgb2   | high mobility group box 2                                                                         | 1.98 |
| 1424207_at   | NM_053124    | Smarca5 | SWI/SNF related, matrix associated, actin dependent regulator of chromatin, subfamily a, member 5 | 1.98 |
| 1447669_s_at | NM_010317    | Gng4    | guanine nucleotide binding protein (G protein), gamma 4                                           | 1.98 |
| 1433443_a_at | NM_145942    | Hmgcs1  | 3-hydroxy-3-methylglutaryl-Coenzyme A synthase 1                                                  | 1.98 |
| 1420028_s_at | NM_008563    | Mcm3    | minichromosome maintenance deficient 3 ( <i>S. cerevisiae</i> )                                   | 1.98 |
| 1437262_x_at | NM_026602    | Bcas2   | breast carcinoma amplified sequence 2                                                             | 1.99 |
| 1436750_a_at | NM_024188    | Oxct1   | 3-oxoacid CoA transferase 1                                                                       | 1.99 |
| 1428224_at   | NM_016690    | Hnrpdl  | heterogeneous nuclear ribonucleoprotein D-like                                                    | 1.99 |
| 1441860_x_at | NM_031156    | Ide     | insulin degrading enzyme                                                                          | 1.99 |
| 1427940_s_at | NM_019660    | Mycbp   | c-myc binding protein                                                                             | 1.99 |
| 1417069_a_at | NM_022023    | Gmfb    | glia maturation factor, beta                                                                      | 1.99 |
| 1456862_at   | NM_011382    | Six4    | sine oculis-related homeobox 4 homolog ( <i>Drosophila</i> )                                      | 1.99 |
| 1423643_at   | NM_197982    | Ddx39   | DEAD (Asp-Glu-Ala-Asp) box polypeptide 39                                                         | 1.99 |
| 1430353_at   | NM_175459    | Glis3   | GLIS family zinc finger 3                                                                         | 1.99 |
| 1434539_at   | NM_010733    | Lrrn3   | leucine rich repeat protein 3, neuronal                                                           | 1.99 |
| 1435323_a_at | NM_153546    | Mboat1  | membrane bound O-acyltransferase domain containing 1                                              | 1.99 |
| 1447520_at   | NM_008489    | Lbp     | lipopolysaccharide binding protein                                                                | 2.00 |
| 1433543_at   | NM_028390    | Anln    | anillin, actin binding protein                                                                    | 2.00 |
| 1417450_a_at | NM_001040435 | Tacc3   | transforming, acidic coiled-coil containing protein 3                                             | 2.00 |
| 1456112_at   | NM_133780    | Tpr     | translocated promoter region                                                                      | 2.00 |
| 1419074_at   | NM_026527    | Chac2   | ChaC, cation transport regulator homolog 2 ( <i>E. coli</i> )                                     | 2.00 |
| 1428114_at   | NM_001171010 | Slc14a1 | solute carrier family 14 (urea transporter), member 1                                             | 2.00 |
| 1439208_at   | NM_007691    | Chek1   | checkpoint kinase 1 homolog ( <i>S. pombe</i> )                                                   | 2.00 |
| 1428130_at   | NM_001172062 | Lman1   | lectin, mannose-binding, 1                                                                        | 2.00 |
| 1437520_a_at | NM_001002929 | Nup85   | nucleoporin 85                                                                                    | 2.01 |
| 1459860_x_at | NM_030706    | Trim2   | tripartite motif-containing 2                                                                     | 2.01 |
| 1448793_a_at | NM_011521    | Sdc4    | syndecan 4                                                                                        | 2.01 |
| 1427094_at   | NM_011133    | Pole2   | polymerase (DNA directed), epsilon 2 (p59 subunit)                                                | 2.01 |
| 1417736_at   | NM_025695    | Smc6    | structural maintenance of chromosomes 6                                                           | 2.01 |
| 1420017_at   | NM_001168679 | Tspan8  | tetraspanin 8                                                                                     | 2.01 |
| 1427707_a_at | NM_009185    | Stil    | Scl/Tal1 interrupting locus                                                                       | 2.01 |
| 1434578_x_at | NM_009391    | Ran     | RAN, member RAS oncogene family                                                                   | 2.02 |
| 1438239_at   | NM_010797    | Mid1    | midline 1                                                                                         | 2.02 |
| 1422716_a_at | NM_001110239 | Acp1    | acid phosphatase 1, soluble                                                                       | 2.02 |
| 1423714_at   | NM_024184    | Asf1b   | ASF1 anti-silencing function 1 homolog B ( <i>S. cerevisiae</i> )                                 | 2.02 |

| Probe Set ID | Accession_ID | Gene            | Description                                                                                          | Fold |
|--------------|--------------|-----------------|------------------------------------------------------------------------------------------------------|------|
| 1433445_x_at | NM_145942    | Hmgcs1          | 3-hydroxy-3-methylglutaryl-Coenzyme A synthase 1                                                     | 2.02 |
| 1416641_at   | NM_001083188 | Lig1            | ligase I, DNA, ATP-dependent                                                                         | 2.02 |
| 1449893_a_at | NM_008377    | Lrig1           | leucine-rich repeats and immunoglobulin-like domains 1                                               | 2.02 |
| 1416076_at   | NM_172301    | Ccnb1           | cyclin B1                                                                                            | 2.03 |
| 1426612_at   | NM_025372    | Tipin           | timeless interacting protein                                                                         | 2.03 |
| 1418472_at   | NM_023113    | Aspa            | aspartoacylase                                                                                       | 2.03 |
| 1438092_x_at | NM_016750    | H2afz           | H2A histone family, member Z                                                                         | 2.03 |
| 1451319_at   | NM_144851    | Senp1           | SUMO1/sentrin specific peptidase 1                                                                   | 2.03 |
| 1453009_at   | NM_027468    | Cpm             | carboxypeptidase M                                                                                   | 2.03 |
| 1428481_s_at | NM_026560    | Cdca8           | cell division cycle associated 8                                                                     | 2.03 |
| 1451263_a_at | NM_024406    | Fabp4           | fatty acid binding protein 4, adipocyte                                                              | 2.03 |
| 1448393_at   | NM_001193619 | Cldn7           | claudin 7                                                                                            | 2.04 |
| 1416258_at   | NM_009387    | Tk1             | thymidine kinase 1                                                                                   | 2.04 |
| 1418919_at   | NM_028232    | Sgol1           | shugoshin-like 1 (S. pombe)                                                                          | 2.04 |
| 1423331_a_at | NM_021495    | Pvrl3           | poliovirus receptor-related 3                                                                        | 2.04 |
| 1429156_at   | NM_001109747 | Cenpw           | centromere protein W                                                                                 | 2.04 |
| 1426406_at   | NM_030241    | Setd8           | SET domain containing (lysine methyltransferase) 8                                                   | 2.04 |
| 1417568_at   | NM_001170866 | Ncald           | neurocalcin delta                                                                                    | 2.04 |
| 1434449_at   | NM_009700    | Aqp4            | aquaporin 4                                                                                          | 2.05 |
| 1418671_at   | NM_007602    | Capn5           | calpain 5                                                                                            | 2.05 |
| 1451888_a_at | NM_011858    | Odz4            | odd Oz/ten-m homolog 4 (Drosophila)                                                                  | 2.05 |
| 1435521_at   | NM_054043    | Msi2            | Musashi homolog 2 (Drosophila)                                                                       | 2.05 |
| 1418405_at   | NM_019447    | Hgfac           | hepatocyte growth factor activator                                                                   | 2.05 |
| 1453107_s_at | NM_008021    |                 | forkhead box M1 /// phosphatidylethanolamine binding protein 1                                       | 2.05 |
| 1429274_at   | NM_027990    | Lypd6b          | LY6/PLAUR domain containing 6B                                                                       | 2.05 |
| 1436453_at   | BB144871     | BB144871        | expressed sequence BB144871                                                                          | 2.05 |
| 1428304_at   | NM_028039    | Esco2           | establishment of cohesion 1 homolog 2 (S. cerevisiae)                                                | 2.06 |
| 1418057_at   | NM_001145886 | Tiam1           | T-cell lymphoma invasion and metastasis 1                                                            | 2.07 |
| 1436450_at   | NM_001024931 | D11Bwg05<br>17e | DNA segment, Chr 11, Brigham & Women's Genetics 0517<br>expressed                                    | 2.07 |
| 1426865_a_at | NM_001081445 | Ncam1           | neural cell adhesion molecule 1                                                                      | 2.07 |
| 1434606_at   | NM_010153    | ErbB3           | v-erb-b2 erythroblastic leukemia viral oncogene homolog 3 (avian)                                    | 2.07 |
| 1427398_at   | NM_080457    | Muc4            | mucin 4                                                                                              | 2.07 |
| 1415878_at   | NM_009103    | Rrm1            | ribonucleotide reductase M1                                                                          | 2.07 |
| 1430596_s_at | NM_028572    | Vgll3           | vestigial like 3 (Drosophila)                                                                        | 2.07 |
| 1434079_s_at | NM_008564    | Mcm2            | minichromosome maintenance deficient 2 mitotin (S. cerevisiae)                                       | 2.08 |
| 1453314_x_at | NM_025642    |                 | RIKEN cDNA 2610039C10 gene                                                                           | 2.08 |
| 1426473_at   | NM_134081    | Dnajc9          | DnaJ (Hsp40) homolog, subfamily C, member 9                                                          | 2.08 |
| 1438434_at   | NM_181416    | Arhgap11a       | Rho GTPase activating protein 11A                                                                    | 2.08 |
| 1424144_at   | NM_026014    | Cdt1            | chromatin licensing and DNA replication factor 1                                                     | 2.08 |
| 1438168_x_at | NM_197982    | Ddx39           | DEAD (Asp-Glu-Ala-Asp) box polypeptide 39                                                            | 2.08 |
| 1427276_at   | NM_133786    | Smc4            | structural maintenance of chromosomes 4                                                              | 2.08 |
| 1426805_at   | NM_001174078 | Smarca4         | SWI/SNF related, matrix associated, actin dependent regulator of<br>chromatin, subfamily a, member 4 | 2.08 |
| 1435033_at   | NM_183019    | Arhgef4         | Rho guanine nucleotide exchange factor (GEF) 4                                                       | 2.09 |
| 1460681_at   | NM_001039185 | Ceacam1         | carcinoembryonic antigen-related cell adhesion molecule 1                                            | 2.09 |
| 1419231_s_at | NM_010661    | Krt12           | keratin 12                                                                                           | 2.09 |
| 1435114_at   | NM_172598    | Wdhd1           | WD repeat and HMG-box DNA binding protein 1                                                          | 2.09 |
| 1450634_at   | NM_007508    | Atp6v1a         | ATPase, H+ transporting, lysosomal V1 subunit A                                                      | 2.09 |
| 1444952_a_at | NM_001145804 | Nucks1          | nuclear casein kinase and cyclin-dependent kinase substrate 1                                        | 2.09 |
| 1451920_a_at | NM_011258    | Rfc1            | replication factor C (activator 1) 1                                                                 | 2.09 |
| 1452703_at   | NM_001171000 | Ahcy12          | S-adenosylhomocysteine hydrolase-like 2                                                              | 2.09 |
| 1419571_at   | NM_022317    | Slc28a3         | solute carrier family 28 (sodium-coupled nucleoside transporter),<br>member 3                        | 2.09 |

| Probe Set ID | Accession_ID | Gene     | Description                                                                               | Fold |
|--------------|--------------|----------|-------------------------------------------------------------------------------------------|------|
| 1439764_s_at | NM_183029    | Igf2bp2  | insulin-like growth factor 2 mRNA binding protein 2                                       | 2.10 |
| 1424351_at   | NM_026323    | Wfdc2    | WAP four-disulfide core domain 2                                                          | 2.10 |
| 1430111_a_at | NM_001024468 | Bcat1    | branched chain aminotransferase 1, cytosolic                                              | 2.10 |
| 1424450_at   | NM_001110337 | Gprc5c   | G protein-coupled receptor, family C, group 5, member C                                   | 2.10 |
| 1427939_s_at | NM_019660    | Mycbp    | c-myc binding protein                                                                     | 2.11 |
| 1437313_x_at | NM_008252    | Hmgb2    | high mobility group box 2                                                                 | 2.11 |
| 1416376_at   | NM_133706    | Tmem97   | transmembrane protein 97                                                                  | 2.11 |
| 1450618_a_at | NM_001164787 |          | small proline-rich protein 2A1 /// small proline-rich protein 2A2                         | 2.11 |
| 1431087_at   | NM_026282    | Spc24    | SPC24, NDC80 kinetochore complex component, homolog (S. cerevisiae)                       | 2.11 |
| 1417419_at   | NM_007631    | Ccnd1    | cyclin D1                                                                                 | 2.11 |
| 1454963_at   | NM_178668    | Pde12    | phosphodiesterase 12                                                                      | 2.11 |
| 1417938_at   | NM_009013    | Rad51ap1 | RAD51 associated protein 1                                                                | 2.11 |
| 1419172_at   | NM_010049    | Dhfr     | dihydrofolate reductase                                                                   | 2.12 |
| 1417932_at   | NM_008360    | Il18     | interleukin 18                                                                            | 2.12 |
| 1428713_s_at | NM_178856    | Gins2    | GIN5 complex subunit 2 (Psf2 homolog)                                                     | 2.12 |
| 1421731_a_at | NM_007999    | Fen1     | flap structure specific endonuclease 1                                                    | 2.12 |
| 1417458_s_at | NM_025415    | Cks2     | CDC28 protein kinase regulatory subunit 2                                                 | 2.12 |
| 1439122_at   | NM_001110826 | Ddx6     | DEAD (Asp-Glu-Ala-Asp) box polypeptide 6                                                  | 2.13 |
| 1433444_at   | NM_145942    | Hmgcs1   | 3-hydroxy-3-methylglutaryl-Coenzyme A synthase 1                                          | 2.13 |
| 1455956_x_at | NM_009829    | Ccnd2    | cyclin D2                                                                                 | 2.13 |
| 1438977_x_at | NM_009391    | Ran      | RAN, member RAS oncogene family                                                           | 2.13 |
| 1439442_x_at | NM_198246    | Yars2    | tyrosyl-tRNA synthetase 2 (mitochondrial)                                                 | 2.14 |
| 1425298_a_at | NM_008670    | Naip1    | NLR family, apoptosis inhibitory protein 1                                                | 2.14 |
| 1417023_a_at | NM_024406    | Fabp4    | fatty acid binding protein 4, adipocyte                                                   | 2.14 |
| 1417623_at   | NM_009194    | Slc12a2  | solute carrier family 12, member 2                                                        | 2.14 |
| 1417506_at   | NM_020567    | Gmn      | geminin                                                                                   | 2.14 |
| 1452608_at   | NM_019660    | Mycbp    | c-myc binding protein                                                                     | 2.14 |
| 1424321_at   | NM_145480    | Rfc4     | replication factor C (activator 1) 4                                                      | 2.14 |
| 1436847_s_at | NM_026560    | Cdca8    | cell division cycle associated 8                                                          | 2.14 |
| 1435945_a_at | NM_001163510 | Kcnn4    | potassium intermediate/small conductance calcium-activated channel, subfamily N, member 4 | 2.15 |
| 1417457_at   | NM_025415    | Cks2     | CDC28 protein kinase regulatory subunit 2                                                 | 2.15 |
| 1454254_s_at | NM_029639    |          | RIKEN cDNA 1600029D21 gene                                                                | 2.15 |
| 1450079_at   | NM_013724    | Nrk      | Nik related kinase                                                                        | 2.15 |
| 1438322_x_at | NM_010191    | Fdft1    | farnesyl diphosphate farnesyl transferase 1                                               | 2.16 |
| 1434745_at   | NM_009829    | Ccnd2    | cyclin D2                                                                                 | 2.16 |
| 1438021_at   | NM_001127382 | Rbm47    | RNA binding motif protein 47                                                              | 2.16 |
| 1424278_a_at | NM_001012273 | Birc5    | baculoviral IAP repeat-containing 5                                                       | 2.16 |
| 1438040_a_at | NM_011631    | Hsp90b1  | heat shock protein 90, beta (Grp94), member 1                                             | 2.16 |
| 1451786_at   | NM_001145874 | Muc20    | mucin 20                                                                                  | 2.16 |
| 1428936_at   | NM_026482    | Atp2b1   | ATPase, Ca <sup>++</sup> transporting, plasma membrane 1                                  | 2.17 |
| 1419513_a_at | NM_001177625 | Ect2     | ect2 oncogene                                                                             | 2.17 |
| 1426864_a_at | NM_001081445 | Ncam1    | neural cell adhesion molecule 1                                                           | 2.17 |
| 1448227_at   | NM_010346    | Grb7     | growth factor receptor bound protein 7                                                    | 2.17 |
| 1423142_a_at | NM_027000    | Gtpbp4   | GTP binding protein 4                                                                     | 2.17 |
| 1434767_at   | NM_172578    | C79407   | expressed sequence C79407                                                                 | 2.17 |
| 1452497_a_at | NM_010901    | Nfatc3   | nuclear factor of activated T-cells, cytoplasmic, calcineurin-dependent 3                 | 2.17 |
| 1423877_at   | NM_028083    | Chaf1b   | chromatin assembly factor 1, subunit B (p60)                                              | 2.17 |
| 1418672_at   | NM_013778    | Akr1c13  | aldo-keto reductase family 1, member C13                                                  | 2.17 |
| 1417353_x_at | NM_021336    | Snrpa1   | small nuclear ribonucleoprotein polypeptide A'                                            | 2.17 |
| 1436237_at   | NM_001033149 | Ttc9     | tetratricopeptide repeat domain 9                                                         | 2.18 |
| 1423367_at   | NM_009527    | Wnt7a    | wingless-related MMTV integration site 7A                                                 | 2.18 |

| Probe Set ID | Accession_ID | Gene     | Description                                                                     | Fold |
|--------------|--------------|----------|---------------------------------------------------------------------------------|------|
| 1423428_at   | NM_013846    | Ror2     | receptor tyrosine kinase-like orphan receptor 2                                 | 2.18 |
| 1442143_at   | NM_178773    | Ano4     | anoctamin 4                                                                     | 2.18 |
| 1423954_at   | NM_009778    | C3       | complement component 3                                                          | 2.18 |
| 1416421_a_at | NM_001110145 | Ssb      | Sjogren syndrome antigen B                                                      | 2.19 |
| 1416022_at   | NM_010634    | Fabp5    | fatty acid binding protein 5, epidermal                                         | 2.19 |
| 1416715_at   | NM_001160012 | Gjb3     | gap junction protein, beta 3                                                    | 2.19 |
| 1450986_at   | NM_018868    | Nop58    | NOP58 ribonucleoprotein homolog (yeast)                                         | 2.19 |
| 1427929_a_at | NM_172134    | Pdxk     | pyridoxal (pyridoxine, vitamin B6) kinase                                       | 2.19 |
| 1438271_at   | NM_001145952 | Lpp      | LIM domain containing preferred translocation partner in lipoma                 | 2.20 |
| 1440147_at   | NM_144945    | Lgi2     | leucine-rich repeat LGI family, member 2                                        | 2.20 |
| 1434628_a_at | NM_027897    | Rhpn2    | rhophilin, Rho GTPase binding protein 2                                         | 2.20 |
| 1418431_at   | NM_008448    | Kif5b    | kinesin family member 5B                                                        | 2.20 |
| 1455836_at   | NM_011112    | Papola   | poly (A) polymerase alpha                                                       | 2.20 |
| 1449740_s_at | NM_007883    | Dsg2     | desmoglein 2                                                                    | 2.20 |
| 1448663_s_at | NM_138656    | Mvd      | mevalonate (diphospho) decarboxylase                                            | 2.21 |
| 1435630_s_at | NM_009338    | Acat2    | acetyl-Coenzyme A acetyltransferase 2                                           | 2.21 |
| 1436174_at   | NM_027435    | Atad2    | ATPase family, AAA domain containing 2                                          | 2.21 |
| 1437251_at   | NM_001110162 | Cdca2    | cell division cycle associated 2                                                | 2.22 |
| 1455814_x_at | NM_197982    | Ddx39    | DEAD (Asp-Glu-Ala-Asp) box polypeptide 39                                       | 2.22 |
| 1453593_at   | NM_028572    | Vgll3    | vestigial like 3 (Drosophila)                                                   | 2.22 |
| 1438480_a_at | NM_144543    | Thyn1    | thymocyte nuclear protein 1                                                     | 2.23 |
| 1438306_at   | NM_027934    | Rnf180   | ring finger protein 180                                                         | 2.23 |
| 1453231_at   | NM_183294    | Cdkl1    | cyclin-dependent kinase-like 1 (CDC2-related kinase)                            | 2.23 |
| 1418924_at   | NM_025886    | Rassf7   | Ras association (RalGDS/AF-6) domain family (N-terminal) member 7               | 2.23 |
| 1452087_at   | NM_029495    | Epsti1   | epithelial stromal interaction 1 (breast)                                       | 2.24 |
| 1429072_at   | NM_026763    | Col6a4   | collagen, type VI, alpha 4                                                      | 2.24 |
| 1424254_at   | NM_001112715 | Ifitm1   | interferon induced transmembrane protein 1                                      | 2.24 |
| 1419153_at   | NM_026515    |          | RIKEN cDNA 2810417H13 gene                                                      | 2.25 |
| 1427261_at   | NM_170779    | Wwc1     | WW, C2 and coiled-coil domain containing 1                                      | 2.25 |
| 1451210_at   | NM_015817    | Ppap2c   | phosphatidic acid phosphatase type 2C                                           | 2.25 |
| 1434437_x_at | NM_009104    | Rrm2     | ribonucleotide reductase M2                                                     | 2.26 |
| 1433408_a_at | NM_027290    | Mcm10    | minichromosome maintenance deficient 10 (S. cerevisiae)                         | 2.26 |
| 1438161_s_at | NM_145480    | Rfc4     | replication factor C (activator 1) 4                                            | 2.26 |
| 1451246_s_at | NM_011496    | Aurkb    | aurora kinase B                                                                 | 2.26 |
| 1452881_at   | NM_178856    | Gins2    | GIN5 complex subunit 2 (Psf2 homolog)                                           | 2.26 |
| 1436839_at   | NM_001162903 |          | RIKEN cDNA 2010109K11 gene                                                      | 2.27 |
| 1435306_a_at | NM_010615    | Kif11    | kinesin family member 11                                                        | 2.27 |
| 1424046_at   | NM_001113179 | Bub1     | budding uninhibited by benzimidazoles 1 homolog (S. cerevisiae)                 | 2.28 |
| 1422680_at   | NM_009431    | Ctr9     | Ctr9, Paf1/RNA polymerase II complex component, homolog (S. cerevisiae)         | 2.28 |
| 1429660_s_at | NM_008017    | Smc2     | structural maintenance of chromosomes 2                                         | 2.28 |
| 1456379_x_at | NM_152915    | Dner     | delta/notch-like EGF-related receptor                                           | 2.28 |
| 1453264_at   | NM_028584    | Marveld3 | MARVEL (membrane-associating) domain containing 3                               | 2.29 |
| 1426652_at   | NM_008563    | Mcm3     | minichromosome maintenance deficient 3 (S. cerevisiae)                          | 2.29 |
| 1436519_a_at | NM_001167767 |          | RIKEN cDNA 1110057K04 gene                                                      | 2.29 |
| 1443536_at   | NM_011990    | Slc7a11  | solute carrier family 7 (cationic amino acid transporter, y+ system), member 11 | 2.30 |
| 1431805_a_at | NM_027897    | Rhpn2    | rhophilin, Rho GTPase binding protein 2                                         | 2.31 |
| 1452226_at   | NM_173867    | Rcc2     | regulator of chromosome condensation 2                                          | 2.31 |
| 1448650_a_at | NM_011132    | Pole     | polymerase (DNA directed), epsilon                                              | 2.31 |
| 1441788_s_at | NM_001030307 | Dkc1     | dyskeratosis congenita 1, dyskerin homolog (human)                              | 2.32 |
| 1457157_at   | NM_001177732 | Plch1    | phospholipase C, eta 1                                                          | 2.32 |

| Probe Set ID | Accession_ID | Gene     | Description                                                                                 | Fold |
|--------------|--------------|----------|---------------------------------------------------------------------------------------------|------|
| 1416492_at   | NM_007633    | Ccne1    | cyclin E1                                                                                   | 2.32 |
| 1438360_x_at | NM_007451    | Slc25a5  | solute carrier family 25 (mitochondrial carrier, adenine nucleotide translocator), member 5 | 2.33 |
| 1417828_at   | NM_001109045 | Aqp8     | aquaporin 8                                                                                 | 2.33 |
| 1424296_at   | NM_010295    | Gclc     | glutamate-cysteine ligase, catalytic subunit                                                | 2.33 |
| 1423933_a_at | NM_029639    |          | RIKEN cDNA 1600029D21 gene                                                                  | 2.33 |
| 1430127_a_at | NM_009829    | Ccnd2    | cyclin D2                                                                                   | 2.34 |
| 1448818_at   | NM_009524    | Wnt5a    | wingless-related MMTV integration site 5A                                                   | 2.34 |
| 1452626_a_at | NM_026928    |          | RIKEN cDNA 1810014F10 gene                                                                  | 2.35 |
| 1426533_at   | NM_024193    | Nop56    | NOP56 ribonucleoprotein homolog (yeast)                                                     | 2.35 |
| 1441917_s_at | NM_001168256 | Tmem40   | transmembrane protein 40                                                                    | 2.36 |
| 1424118_a_at | NM_025565    | Spc25    | SPC25, NDC80 kinetochore complex component, homolog (S. cerevisiae)                         | 2.37 |
| 1449705_x_at | NM_008563    | Mcm3     | minichromosome maintenance deficient 3 (S. cerevisiae)                                      | 2.37 |
| 1423674_at   | NM_146144    | Usp1     | ubiquitin specific peptidase 1                                                              | 2.38 |
| 1450051_at   | NM_009530    | Atrx     | alpha thalassemia/mental retardation syndrome X-linked homolog (human)                      | 2.38 |
| 1433804_at   | NM_146145    | Jak1     | Janus kinase 1                                                                              | 2.38 |
| 1416299_at   | NM_011369    | Shcbp1   | Shc SH2-domain binding protein 1                                                            | 2.38 |
| 1448906_at   | NM_007663    | Cdh16    | cadherin 16                                                                                 | 2.38 |
| 1416368_at   | NM_010357    | Gsta4    | glutathione S-transferase, alpha 4                                                          | 2.39 |
| 1418129_at   | NM_053272    | Dhcr24   | 24-dehydrocholesterol reductase                                                             | 2.39 |
| 1441926_x_at | NM_146260    | Tmie     | transmembrane inner ear                                                                     | 2.40 |
| 1454728_s_at | NM_001038999 | Atp8a1   | ATPase, aminophospholipid transporter (APLT), class I, type 8A, member 1                    | 2.40 |
| 1418724_at   | NM_007686    | Cfi      | complement component factor i                                                               | 2.41 |
| 1452227_at   | NM_172710    | Sel1l3   | sel-1 suppressor of lin-12-like 3 (C. elegans)                                              | 2.41 |
| 1419148_at   | NM_009635    | Avil     | advillin                                                                                    | 2.41 |
| 1448794_s_at | NM_009584    | Dnajc2   | DnaJ (Hsp40) homolog, subfamily C, member 2                                                 | 2.41 |
| 1416034_at   | NM_009846    | Cd24a    | CD24a antigen                                                                               | 2.42 |
| 1422430_at   | NM_001163359 | Fignl1   | fidgetin-like 1                                                                             | 2.42 |
| 1452679_at   | NM_023716    | Tubb2b   | tubulin, beta 2B                                                                            | 2.43 |
| 1422842_at   | NM_011917    | Xrn2     | 5'-3' exoribonuclease 2                                                                     | 2.43 |
| 1415802_at   | NM_009196    | Slc16a1  | solute carrier family 16 (monocarboxylic acid transporters), member 1                       | 2.43 |
| 1448263_a_at | NM_023149    | Cndp2    | CNDP dipeptidase 2 (metallopeptidase M20 family)                                            | 2.44 |
| 1434913_at   | NM_173731    | Hmgcl1   | 3-hydroxymethyl-3-methylglutaryl-Coenzyme A lyase-like 1                                    | 2.45 |
| 1449171_at   | NM_001110265 | Ttk      | Ttk protein kinase                                                                          | 2.45 |
| 1435641_at   | NM_173870    | Mgat4a   | mannoside acetylglucosaminyltransferase 4, isoenzyme A                                      | 2.46 |
| 1448627_s_at | NM_023209    | Pbk      | PDZ binding kinase                                                                          | 2.47 |
| 1460406_at   | NM_001033210 | Pls1     | plastin 1 (I-isoform)                                                                       | 2.48 |
| 1460177_at   | NM_023149    | Cndp2    | CNDP dipeptidase 2 (metallopeptidase M20 family)                                            | 2.49 |
| 1450455_s_at | NM_013777    |          | aldo-keto reductase family 1, member C12 /// aldo-keto reductase family 1, member C13       | 2.49 |
| 1429844_at   | NM_027158    |          | RIKEN cDNA 2310043J07 gene                                                                  | 2.49 |
| 1418281_at   | NM_011234    | Rad51    | RAD51 homolog (S. cerevisiae)                                                               | 2.50 |
| 1418930_at   | NM_021274    | Cxcl10   | chemokine (C-X-C motif) ligand 10                                                           | 2.50 |
| 1429295_s_at | NM_027182    | Trip13   | thyroid hormone receptor interactor 13                                                      | 2.50 |
| 1427931_s_at | NM_172134    | Pdxk     | pyridoxal (pyridoxine, vitamin B6) kinase                                                   | 2.50 |
| 1425163_at   | NM_145489    | AI661453 | expressed sequence AI661453                                                                 | 2.50 |
| 1417823_at   | NM_001161712 | Gcat     | glycine C-acetyltransferase (2-amino-3-ketobutyrate-coenzyme A ligase)                      | 2.51 |
| 1439357_at   | NM_001034029 | Il17re   | interleukin 17 receptor E                                                                   | 2.51 |
| 1451065_a_at | NM_197982    | Ddx39    | DEAD (Asp-Glu-Ala-Asp) box polypeptide 39                                                   | 2.51 |
| 1427229_at   | NM_008255    | Hmgcr    | 3-hydroxy-3-methylglutaryl-Coenzyme A reductase                                             | 2.51 |

| Probe Set ID | Accession_ID | Gene     | Description                                                                                                                         | Fold |
|--------------|--------------|----------|-------------------------------------------------------------------------------------------------------------------------------------|------|
| 1417896_at   | NM_013769    | Tjp3     | tight junction protein 3                                                                                                            | 2.51 |
| 1436808_x_at | NM_008566    | Mcm5     | minichromosome maintenance deficient 5, cell division cycle 46 (S. cerevisiae)                                                      | 2.52 |
| 1436021_at   | NM_001114662 | Mfsd4    | major facilitator superfamily domain containing 4                                                                                   | 2.52 |
| 1419717_at   | NM_011348    | Sema3e   | sema domain, immunoglobulin domain (Ig), short basic domain, secreted, (semaphorin) 3E                                              | 2.53 |
| 1422460_at   | NM_019499    | Mad2l1   | MAD2 mitotic arrest deficient-like 1 (yeast)                                                                                        | 2.54 |
| 1421821_at   | NM_010700    | Ldlr     | low density lipoprotein receptor                                                                                                    | 2.54 |
| 1416661_at   | NM_010123    | Eif3a    | eukaryotic translation initiation factor 3, subunit A                                                                               | 2.54 |
| 1424292_at   | NM_001172092 | Depdc1a  | DEP domain containing 1a                                                                                                            | 2.54 |
| 1418024_at   | NM_053089    | Naa15    | N(alpha)-acetyltransferase 15, NatA auxiliary subunit                                                                               | 2.55 |
| 1422123_s_at | NM_001039185 |          | carcinoembryonic antigen-related cell adhesion molecule 1 /// carcinoembryonic antigen-related cell adhesion molecule 2             | 2.55 |
| 1416596_at   | NM_023557    | Slc44a4  | solute carrier family 44, member 4                                                                                                  | 2.56 |
| 1436704_x_at | NM_138745    | Mthfd1   | methylenetetrahydrofolate dehydrogenase (NADP+ dependent), methenyltetrahydrofolate cyclohydrolase, formyltetrahydrofolate synthase | 2.57 |
| 1452912_at   | NM_183089    | Dscc1    | defective in sister chromatid cohesion 1 homolog (S. cerevisiae)                                                                    | 2.57 |
| 1416802_a_at | NM_026410    | Cdca5    | cell division cycle associated 5                                                                                                    | 2.57 |
| 1450988_at   | NM_010195    | Lgr5     | leucine rich repeat containing G protein coupled receptor 5                                                                         | 2.57 |
| 1448777_at   | NM_008564    | Mcm2     | minichromosome maintenance deficient 2 mitotin (S. cerevisiae)                                                                      | 2.57 |
| 1436335_at   | NM_001113360 | Plch2    | phospholipase C, eta 2                                                                                                              | 2.58 |
| 1418264_at   | NM_021790    | Cenpk    | centromere protein K                                                                                                                | 2.60 |
| 1415945_at   | NM_008566    | Mcm5     | minichromosome maintenance deficient 5, cell division cycle 46 (S. cerevisiae)                                                      | 2.60 |
| 1418076_at   | NM_011176    | St14     | suppression of tumorigenicity 14 (colon carcinoma)                                                                                  | 2.60 |
| 1420352_at   | NM_133731    | Prss22   | protease, serine, 22                                                                                                                | 2.61 |
| 1449708_s_at | NM_007691    | Chek1    | checkpoint kinase 1 homolog (S. pombe)                                                                                              | 2.62 |
| 1450780_s_at | NM_010441    | Hmga2    | high mobility group AT-hook 2                                                                                                       | 2.63 |
| 1460682_s_at | NM_001039185 |          | carcinoembryonic antigen-related cell adhesion molecule 1 /// carcinoembryonic antigen-related cell adhesion molecule 2             | 2.63 |
| 1422533_at   | NM_020010    | Cyp51    | cytochrome P450, family 51                                                                                                          | 2.63 |
| 1448235_s_at | NM_001111282 |          | high-mobility group (nonhistone chromosomal) protein 1-like 1                                                                       | 2.64 |
| 1434695_at   | NM_029766    | Dtl      | denticleless homolog (Drosophila)                                                                                                   | 2.64 |
| 1439793_at   | NM_016975    | Gja3     | gap junction protein, alpha 3                                                                                                       | 2.64 |
| 1428859_at   | NM_153783    | Paox     | polyamine oxidase (exo-N4-amino)                                                                                                    | 2.64 |
| 1417588_at   | NM_015736    | Galnt3   | UDP-N-acetyl-alpha-D-galactosamine:polypeptide N-acetylgalactosaminyltransferase 3                                                  | 2.65 |
| 1448743_at   | NM_138744    | Ssx2ip   | synovial sarcoma, X breakpoint 2 interacting protein                                                                                | 2.68 |
| 1418457_at   | NM_019568    | Cxcl14   | chemokine (C-X-C motif) ligand 14                                                                                                   | 2.68 |
| 1448130_at   | NM_010191    | Fdft1    | farnesyl diphosphate farnesyl transferase 1                                                                                         | 2.68 |
| 1439476_at   | NM_007883    | Dsg2     | desmoglein 2                                                                                                                        | 2.68 |
| 1450494_x_at | NM_001039185 | Ceacam1  | carcinoembryonic antigen-related cell adhesion molecule 1                                                                           | 2.68 |
| 1438009_at   | NM_001177544 |          | predicted gene 11276 /// histone cluster 1, H2ao                                                                                    | 2.69 |
| 1426301_at   | NM_009655    | Alcam    | activated leukocyte cell adhesion molecule                                                                                          | 2.71 |
| 1425452_s_at | NM_029007    | Fam84a   | family with sequence similarity 84, member A                                                                                        | 2.71 |
| 1450035_a_at | NM_018785    | Prpf40a  | PRP40 pre-mRNA processing factor 40 homolog A (yeast)                                                                               | 2.71 |
| 1422760_at   | NM_011061    | Padi4    | peptidyl arginine deiminase, type IV                                                                                                | 2.72 |
| 1416558_at   | NM_010790    | Melk     | maternal embryonic leucine zipper kinase                                                                                            | 2.73 |
| 1417812_a_at | NM_008484    | Lamb3    | laminin, beta 3                                                                                                                     | 2.74 |
| 1439568_at   | NM_015764    | Greb1    | gene regulated by estrogen in breast cancer protein                                                                                 | 2.74 |
| 1448899_s_at | NM_009013    | Rad51ap1 | RAD51 associated protein 1                                                                                                          | 2.74 |
| 1418601_at   | NM_011921    | Aldh1a7  | aldehyde dehydrogenase family 1, subfamily A7                                                                                       | 2.75 |
| 1417738_at   | NM_016899    | Rab25    | RAB25, member RAS oncogene family                                                                                                   | 2.76 |
| 1435494_s_at | NM_023842    | Dsp      | desmoplakin                                                                                                                         | 2.76 |



| Probe Set ID | Accession_ID | Gene      | Description                                                                                        | Fold |
|--------------|--------------|-----------|----------------------------------------------------------------------------------------------------|------|
| 1442058_s_at | NM_008949    | Psmc3ip   | proteasome (prosome, macropain) 26S subunit, ATPase 3, interacting protein                         | 2.76 |
| 1420579_s_at | NM_021050    | Cftr      | cystic fibrosis transmembrane conductance regulator homolog                                        | 2.77 |
| 1448229_s_at | NM_009829    | Ccnd2     | cyclin D2                                                                                          | 2.77 |
| 1449484_at   | NM_011491    | Stc2      | stanniocalcin 2                                                                                    | 2.77 |
| 1419593_at   | NM_015764    | Greb1     | gene regulated by estrogen in breast cancer protein                                                | 2.77 |
| 1441963_at   | NM_197945    | Prosapip1 | ProSAPiP1 protein                                                                                  | 2.77 |
| 1419230_at   | NM_010661    | Krt12     | keratin 12                                                                                         | 2.77 |
| 1425029_a_at | NM_001083341 | Mboat2    | membrane bound O-acyltransferase domain containing 2                                               | 2.78 |
| 1440888_at   | NM_001081147 | Oxtr      | oxytocin receptor                                                                                  | 2.79 |
| 1432339_at   | AK017023     |           | RIKEN cDNA 4933432103 gene                                                                         | 2.80 |
| 1436708_x_at | NM_008565    | Mcm4      | minichromosome maintenance deficient 4 homolog (S. cerevisiae)                                     | 2.81 |
| 1426573_at   | NM_145494    |           | NAD-dependent malic enzyme, mitochondrial-like                                                     | 2.82 |
| 1435493_at   | NM_023842    | Dsp       | desmoplakin                                                                                        | 2.83 |
| 1451064_a_at | NM_177420    | Psat1     | phosphoserine aminotransferase 1                                                                   | 2.85 |
| 1454788_at   | NM_177305    | Arl4c     | ADP-ribosylation factor-like 4C                                                                    | 2.87 |
| 1422851_at   | NM_010441    | Hmga2     | high mobility group AT-hook 2                                                                      | 2.88 |
| 1452257_at   | NM_001122683 | Bdh1      | 3-hydroxybutyrate dehydrogenase, type 1                                                            | 2.88 |
| 1438852_x_at | NM_008567    | Mcm6      | minichromosome maintenance deficient 6 (MIS5 homolog, S. pombe) (S. cerevisiae)                    | 2.88 |
| 1437502_x_at | NM_009846    | Cd24a     | CD24a antigen                                                                                      | 2.90 |
| 1437497_a_at | NM_010480    | Hsp90aa1  | heat shock protein 90, alpha (cytosolic), class A member 1                                         | 2.90 |
| 1423418_at   | NM_134469    | Fdps      | farnesyl diphosphate synthetase                                                                    | 2.91 |
| 1429364_at   | NM_029482    |           | RIKEN cDNA 4930579G24 gene                                                                         | 2.92 |
| 1426572_at   | NM_145494    |           | NAD-dependent malic enzyme, mitochondrial-like /// malic enzyme 2, NAD(+)-dependent, mitochondrial | 2.93 |
| 1429413_at   | NM_027468    | Cpm       | carboxypeptidase M                                                                                 | 2.93 |
| 1448226_at   | NM_009104    | Rrm2      | ribonucleotide reductase M2                                                                        | 2.94 |
| 1424629_at   | NM_009764    | Brca1     | breast cancer 1                                                                                    | 2.95 |
| 1418937_at   | NM_010050    | Dio2      | deiodinase, iodothyronine, type II                                                                 | 2.97 |
| 1419152_at   | NM_026515    |           | RIKEN cDNA 2810417H13 gene                                                                         | 2.97 |
| 1436186_at   | NM_001013368 | E2f8      | E2F transcription factor 8                                                                         | 2.97 |
| 1423952_a_at | NM_033073    | Krt7      | keratin 7                                                                                          | 2.98 |
| 1455516_at   | NM_153409    | Csrnp3    | cysteine-serine-rich nuclear protein 3                                                             | 3.00 |
| 1426911_at   | NM_013505    | Dsc2      | desmocollin 2                                                                                      | 3.00 |
| 1441971_at   | AW543723     |           |                                                                                                    | 3.00 |
| 1430143_at   | AK015205     |           | RIKEN cDNA 4930426D05 gene                                                                         | 3.00 |
| 1422535_at   | NM_001037134 | Ccne2     | cyclin E2                                                                                          | 3.03 |
| 1418252_at   | NM_008812    | Padi2     | peptidyl arginine deiminase, type II                                                               | 3.04 |
| 1438799_at   | NR_015388    | Dlx6os1   | Dlx6 opposite strand transcript 1                                                                  | 3.05 |
| 1454607_s_at | NM_177420    | Psat1     | phosphoserine aminotransferase 1                                                                   | 3.07 |
| 1437110_at   | NM_026054    |           | RIKEN cDNA 2810474O19 gene                                                                         | 3.08 |
| 1457044_at   | NM_001163136 | Macc1     | metastasis associated in colon cancer 1                                                            | 3.09 |
| 1417019_a_at | NM_001025779 | Cdc6      | cell division cycle 6 homolog (S. cerevisiae)                                                      | 3.10 |
| 1451527_at   | NM_029620    | Pcolce2   | procollagen C-endopeptidase enhancer 2                                                             | 3.12 |
| 1450871_a_at | NM_001024468 | Bcat1     | branched chain aminotransferase 1, cytosolic                                                       | 3.14 |
| 1415993_at   | NM_009270    | Sqle      | squalene epoxidase                                                                                 | 3.15 |
| 1436115_at   | NM_001033248 | Gm266     | predicted gene 266                                                                                 | 3.18 |
| 1436512_at   | NM_177305    | Arl4c     | ADP-ribosylation factor-like 4C                                                                    | 3.29 |
| 1419072_at   | NM_026672    | Gstm7     | glutathione S-transferase, mu 7                                                                    | 3.32 |
| 1416123_at   | NM_009829    | Ccnd2     | cyclin D2                                                                                          | 3.34 |
| 1417789_at   | NM_011330    | Ccl11     | chemokine (C-C motif) ligand 11                                                                    | 3.34 |
| 1434278_at   | NM_001164190 | Mtm1      | X-linked myotubular myopathy gene 1                                                                | 3.38 |

| Probe Set ID | Accession_ID | Gene     | Description                                                                         | Fold |
|--------------|--------------|----------|-------------------------------------------------------------------------------------|------|
| 1448752_at   | NM_009801    | Car2     | carbonic anhydrase 2                                                                | 3.39 |
| 1427334_s_at | NM_026054    |          | RIKEN cDNA 2810474O19 gene                                                          | 3.39 |
| 1418509_at   | NM_007621    | Cbr2     | carbonyl reductase 2                                                                | 3.40 |
| 1449199_at   | NM_013605    | Muc1     | mucin 1, transmembrane                                                              | 3.44 |
| 1452661_at   | NM_011638    | Tfrc     | transferrin receptor                                                                | 3.46 |
| 1424649_a_at | NM_001168679 | Tspan8   | tetraspanin 8                                                                       | 3.49 |
| 1460463_at   | XM_001476279 | H60c     | histocompatibility 60c                                                              | 3.51 |
| 1437760_at   | NM_172693    | Galnt12  | UDP-N-acetyl-alpha-D-galactosamine:polypeptide N-acetylgalactosaminyltransferase 12 | 3.52 |
| 1435486_at   | NM_001195046 | Pak3     | p21 protein (Cdc42/Rac)-activated kinase 3                                          | 3.52 |
| 1415810_at   | NM_001111078 | Uhrf1    | ubiquitin-like, containing PHD and RING finger domains, 1                           | 3.53 |
| 1416271_at   | NM_022032    | Perp     | PERP, TP53 apoptosis effector                                                       | 3.61 |
| 1448881_at   | NM_017370    | Hp       | haptoglobin                                                                         | 3.63 |
| 1455186_a_at | NM_029821    |          | RIKEN cDNA 1190003J15 gene                                                          | 3.63 |
| 1433579_at   | NM_178715    | Tmem30b  | transmembrane protein 30B                                                           | 3.63 |
| 1418938_at   | NM_010050    | Dio2     | deiodinase, iodothyronine, type II                                                  | 3.69 |
| 1425753_a_at | NM_001040691 | Ung      | uracil DNA glycosylase                                                              | 3.69 |
| 1426858_at   | NM_008381    | Inhbb    | inhibin beta-B                                                                      | 3.70 |
| 1450646_at   | NM_020010    | Cyp51    | cytochrome P450, family 51                                                          | 3.80 |
| 1425538_x_at | NM_001039185 | Ceacam1  | carcinoembryonic antigen-related cell adhesion molecule 1                           | 3.87 |
| 1431786_s_at | NM_029821    |          | RIKEN cDNA 1190003J15 gene                                                          | 3.90 |
| 1417541_at   | NM_008234    | Hells    | helicase, lymphoid specific                                                         | 3.91 |
| 1452716_at   | NM_027464    |          | RIKEN cDNA 5730469M10 gene                                                          | 3.93 |
| 1420378_at   | NM_009160    | Sftpd    | surfactant associated protein D                                                     | 3.94 |
| 1427630_x_at | NM_001039185 | Ceacam1  | carcinoembryonic antigen-related cell adhesion molecule 1                           | 3.96 |
| 1424502_at   | NM_146050    | Oit1     | oncoprotein induced transcript 1                                                    | 3.97 |
| 1423597_at   | NM_001038999 | Atp8a1   | ATPase, aminophospholipid transporter (APLT), class I, type 8A, member 1            | 4.01 |
| 1449254_at   | NM_009263    | Spp1     | secreted phosphoprotein 1                                                           | 4.08 |
| 1450194_a_at | NM_010848    | Myb      | myeloblastosis oncogene                                                             | 4.16 |
| 1418449_at   | NM_133664    | Lad1     | ladinin                                                                             | 4.17 |
| 1434877_at   | NM_008730    | Nptx1    | neuronal pentraxin 1                                                                | 4.17 |
| 1418649_at   | NM_028133    | Egln3    | EGL nine homolog 3 (C. elegans)                                                     | 4.22 |
| 1425675_s_at | NM_001039185 | Ceacam1  | carcinoembryonic antigen-related cell adhesion molecule 1                           | 4.24 |
| 1418979_at   | NM_134072    | Akr1c14  | aldo-keto reductase family 1, member C14                                            | 4.27 |
| 1423078_a_at | NM_025436    | Sc4mol   | sterol-C4-methyl oxidase-like                                                       | 4.31 |
| 1438512_at   | NM_001193274 | BC048679 | cDNA sequence BC048679                                                              | 4.32 |
| 1451895_a_at | NM_053272    | Dhcr24   | 24-dehydrocholesterol reductase                                                     | 4.36 |
| 1426302_at   | NM_145403    | Tmprss4  | transmembrane protease, serine 4                                                    | 4.45 |
| 1419332_at   | NM_019397    | Egfl6    | EGF-like-domain, multiple 6                                                         | 4.47 |
| 1416916_at   | NM_001163131 | Elf3     | E74-like factor 3                                                                   | 4.50 |
| 1417314_at   | NM_001142706 |          | complement component 2 (within H-2S) /// complement factor B                        | 4.51 |
| 1448566_at   | NM_016917    | Slc40a1  | solute carrier family 40 (iron-regulated transporter), member 1                     | 4.53 |
| 1426566_s_at | NM_001034029 | Il17re   | interleukin 17 receptor E                                                           | 4.54 |
| 1451122_at   | NM_145360    | Idi1     | isopentenyl-diphosphate delta isomerase                                             | 4.82 |
| 1447774_x_at | NM_027464    |          | RIKEN cDNA 5730469M10 gene                                                          | 4.93 |
| 1421317_x_at | NM_010848    | Myb      | myeloblastosis oncogene                                                             | 4.98 |
| 1434280_at   | BG976607     |          |                                                                                     | 5.09 |
| 1448265_x_at | NM_007962    | Mpzl2    | myelin protein zero-like 2                                                          | 5.23 |
| 1417895_a_at | NM_025452    | Tmem54   | transmembrane protein 54                                                            | 5.35 |
| 1423804_a_at | NM_145360    | Idi1     | isopentenyl-diphosphate delta isomerase                                             | 5.57 |
| 1455531_at   | NM_001114662 | Mfsd4    | major facilitator superfamily domain containing 4                                   | 5.67 |
| 1417061_at   | NM_016917    | Slc40a1  | solute carrier family 40 (iron-regulated transporter), member 1                     | 5.81 |
| 1426872_at   | NM_001122603 | Fcgbp    | Fc fragment of IgG binding protein                                                  | 5.93 |

| Probe Set ID | Accession_ID | Gene    | Description                                                                  | Fold  |
|--------------|--------------|---------|------------------------------------------------------------------------------|-------|
| 1416236_a_at | NM_007962    | Mpzl2   | myelin protein zero-like 2                                                   | 6.00  |
| 1455454_at   | NM_001013785 | Akr1c19 | aldo-keto reductase family 1, member C19                                     | 6.32  |
| 1417155_at   | NM_008709    | Mycn    | v-myc myelocytomatosis viral related oncogene, neuroblastoma derived (avian) | 7.73  |
| 1424357_at   | NM_144936    | Tmem45b | transmembrane protein 45b                                                    | 8.01  |
| 1423323_at   | NM_020047    | Tacstd2 | tumor-associated calcium signal transducer 2                                 | 8.06  |
| 1449833_at   | NM_011472    | Sprr2f  | small proline-rich protein 2F                                                | 8.32  |
| 1419323_at   | NM_011059    | Padi1   | peptidyl arginine deiminase, type I                                          | 8.36  |
| 1434719_at   | NM_175628    | A2m     | alpha-2-macroglobulin                                                        | 8.53  |
| 1438555_x_at | NM_080457    | Muc4    | mucin 4                                                                      | 9.16  |
| 1424733_at   | NM_001008497 | P2ry14  | purinergic receptor P2Y, G-protein coupled, 14                               | 9.23  |
| 1420401_a_at | NM_019511    | Ramp3   | receptor (calcitonin) activity modifying protein 3                           | 9.54  |
| 1427042_at   | NM_178920    | Mal2    | mal, T-cell differentiation protein 2                                        | 9.55  |
| 1422604_at   | NM_009474    | Uox     | urate oxidase                                                                | 12.22 |
| 1450009_at   | NM_008522    | Ltf     | lactotransferrin                                                             | 12.75 |
| 1453503_at   | NM_030061    | Spink12 | serine peptidase inhibitor, Kazal type 11                                    | 13.04 |
| 1423271_at   | NM_008125    | Gjb2    | gap junction protein, beta 2                                                 | 17.09 |
| 1455996_x_at | NM_009475    | Prap1   | proline-rich acidic protein 1                                                | 23.07 |
| 1419167_at   | NM_009475    | Prap1   | proline-rich acidic protein 1                                                | 30.47 |
| 1416306_at   | NM_017474    | Clca3   | chloride channel calcium activated 3                                         | 36.21 |
| 1427747_a_at | NM_008491    | Lcn2    | lipocalin 2                                                                  | 62.12 |
